# Supplementary material for: Differential RNA Editing and Intron Splicing in Soybean Mitochondria during Nodulation
Source: MDPI journal article supplement (doi:10.3390/ijms21249378), 2020-12-09
Supplement: s1 [file s1]

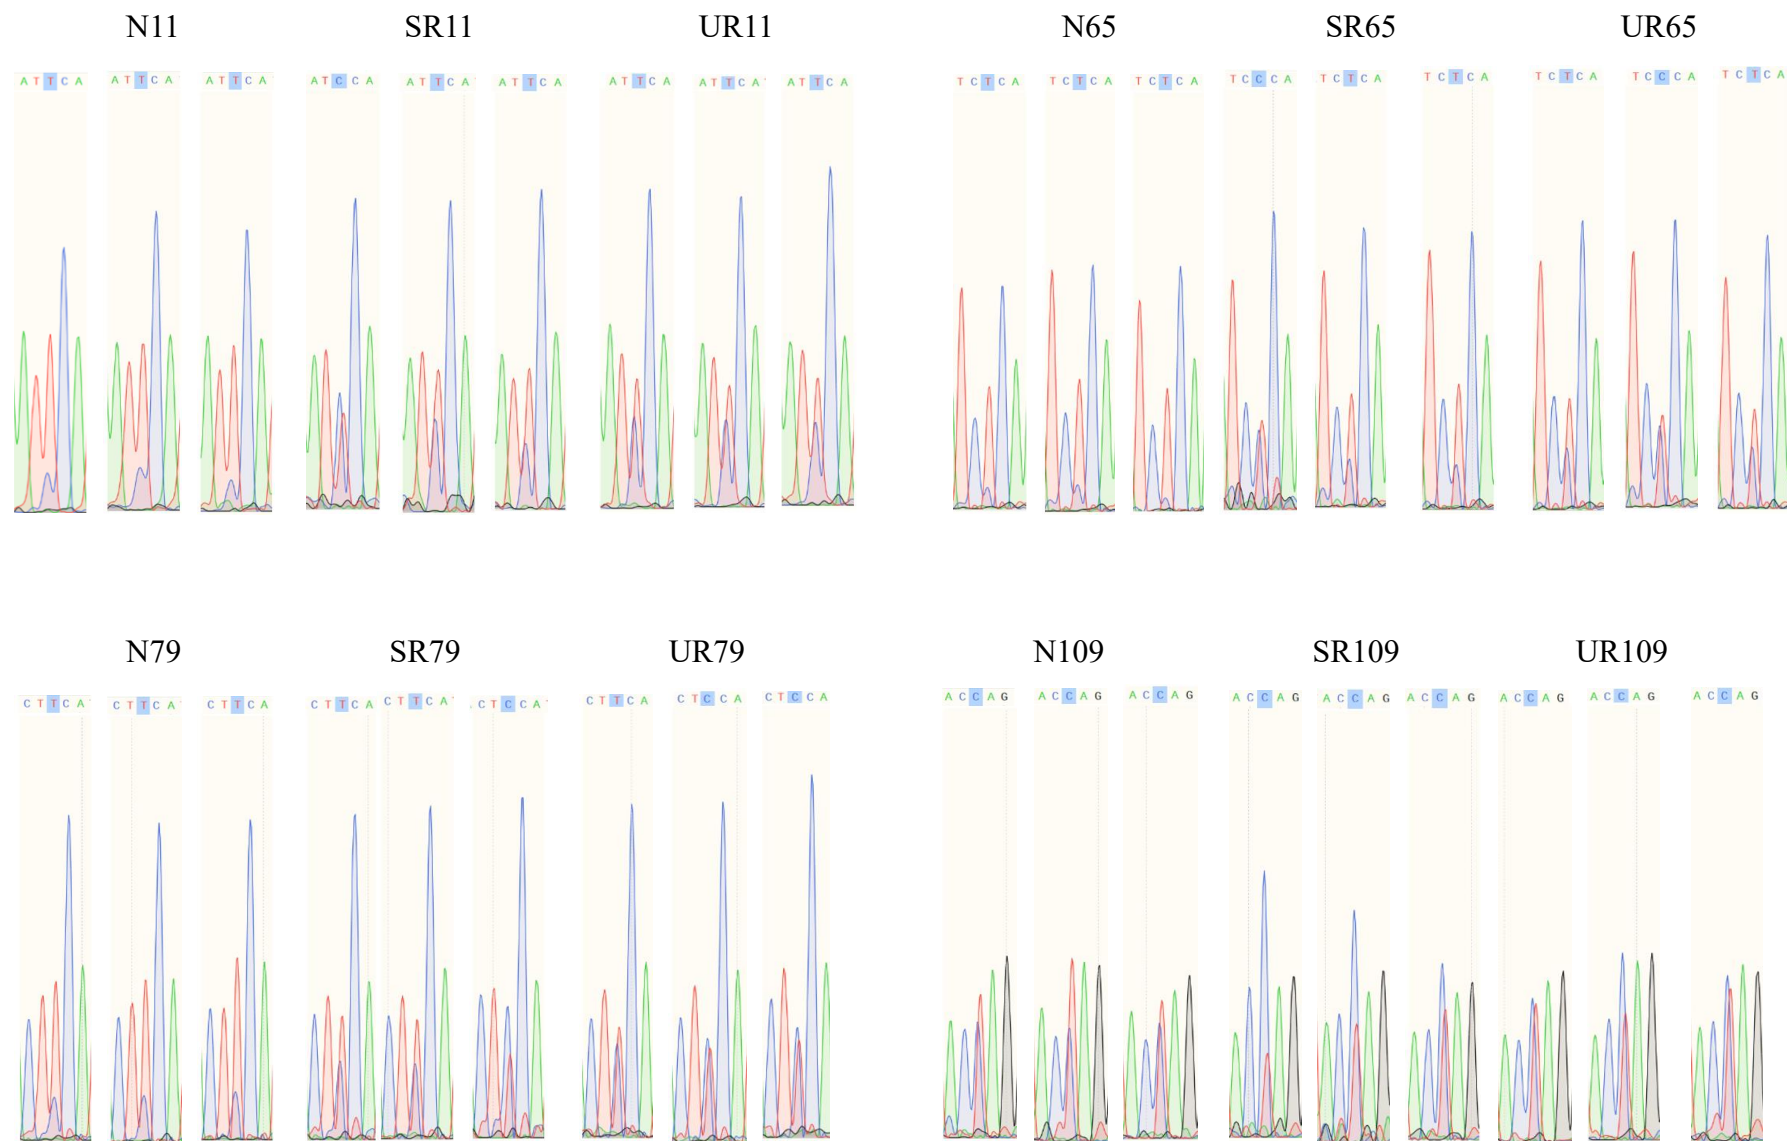

**Supplementary Figure S1.** Sanger sequencing results of three biological replicates of RNA editing sites on *matR* transcripts.

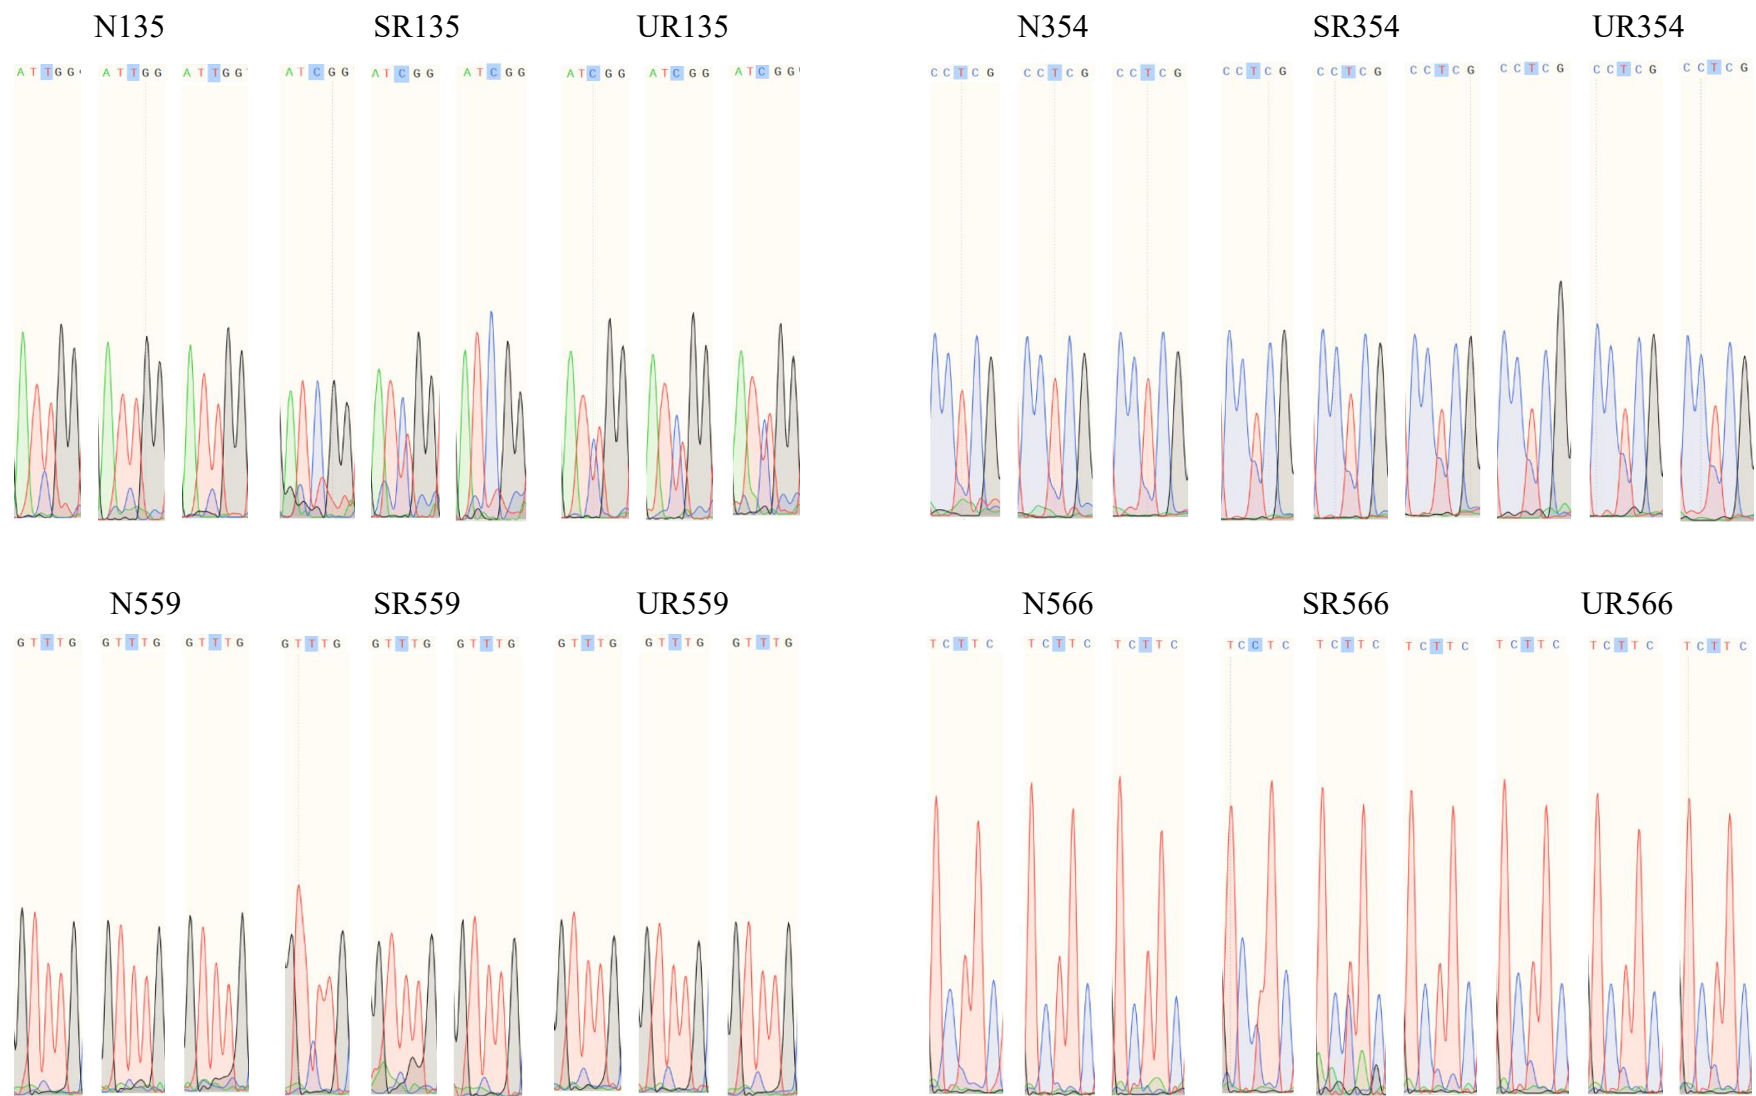

**Supplementary Figure S1.** Sanger sequencing results of three biological replicates of RNA editing sites on *matR* transcripts.

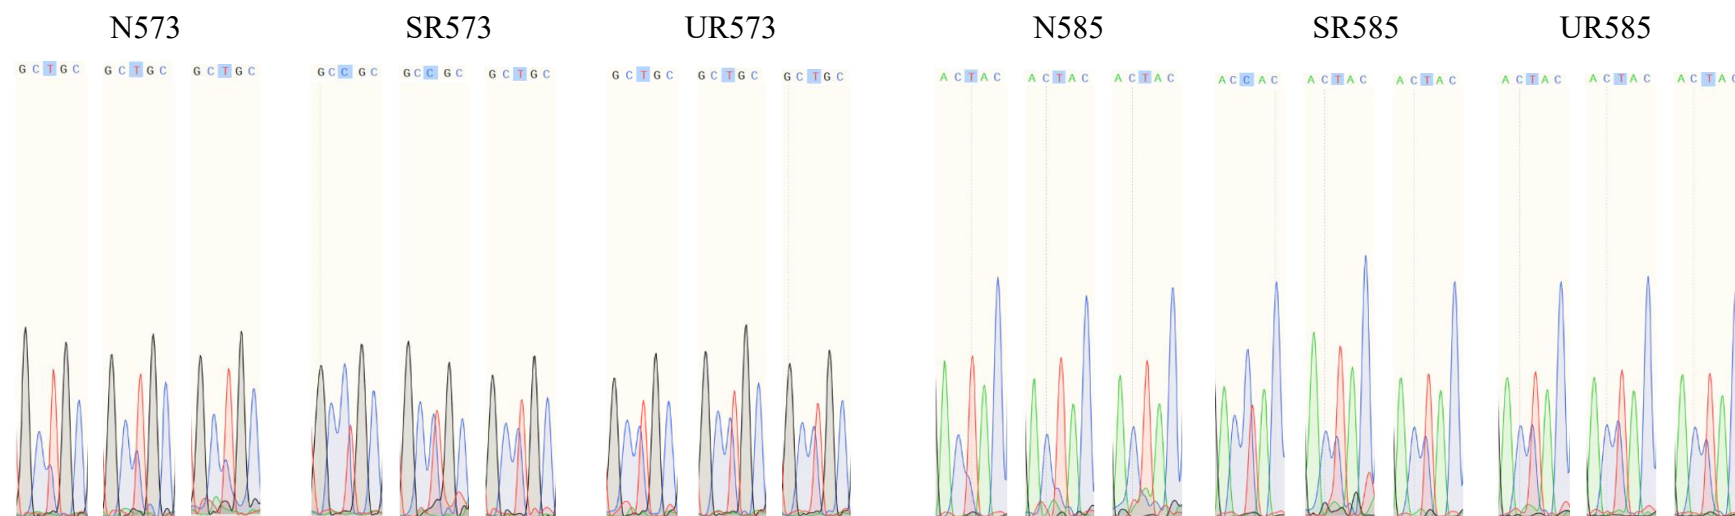

**Supplementary Figure S1.** Sanger sequencing results of three biological replicates of RNA editing sites on *matR* transcripts.
