# Supplementary material for: Differential RNA Editing and Intron Splicing in Soybean Mitochondria during Nodulation
Source: Int J Mol Sci. 2020 Dec 9;21(24):9378. doi: 10.3390/ijms21249378 (PMC7764374; doi:10.3390/ijms21249378)
Supplement: Supplementary file 1 [file ijms-21-09378-s001.zip › Supplementary Tables S1 to S5.xlsx]

## Sheet: Table S1
Table S1. Normalized read count for each mitochondrial transcript in the three tissues.
Gene ID	Gene Name	Function description	Start	End	Length										Normalized read count
						UR-FPKM	SR-FPKM	N-FPKM	SR/UR	p-value	N/UR	p-value	N/SR	p-value	Root-1	Root-2	Root-3	Stripped-root-1	Stripped-root-2	Stripped-root-3	Nodule-1	Nodule-2	Nodule-3
GlmaxMp01	ccmC	cytochrome c biogenesis C	1653	2393	741	15863.3	20620	10842.3	1.29985	0.00119486	0.683479	8.9337e-05	0.525814	4.70999e-05	11496.4	11593.5	12174.3	15029.2	16013.2	14795.8	8211.52	8011.38	7879.43
GlmaxMp02	orf104a	hypothetical protein	3110	3424	315	230.828	155.578	108.071	0.674002	0.250067	0.468191	0.0933944	0.694643	0.120676	105.268	49.2893	63.575	38.5255	56.3714	52.1247	30.6482	26.8961	44.5832
GlmaxMp03	orf150	hypothetical protein	4013	4465	453	51.3683	70.7054	69.4621	1.37644	0.365324	1.35224	0.383	0.982416	0.891992	23.6316	9.20067	36.9773	28.5374	29.4112	38.14	36.1211	28.1187	30.1592
GlmaxMp04	cox3	cytochrome c oxidase subunit III	10907	11704	798	31643.2	31486.4	60519.6	0.995044	0.943415	1.91256	0.000200359	1.92208	8.7971e-06	28474.6	23837.6	23441.7	24396.6	25557.1	25424.8	46881.3	49238.3	48764.2
GlmaxMp05-1	nad5	NADH dehydrogenase subunit 5	252035;253124	252264;254339	1446	17739.2	26993.8	25170.5	1.5217	0.0135928	1.41892	0.0254914	0.932454	0.0362444	26659.7	19886.9	30406	40269.1	37550.1	39279.8	36968.8	36287.2	35933.4
GlmaxMp05-2	nad5	NADH dehydrogenase subunit 5	12450	12471	22	26303.3	42023.2	55653.5	1.59764	0.0040202	2.11584	0.000153239	1.32435	0.00331513	635.189	600.015	500.815	840.426	966.892	966.214	1260.95	1182.21	1229.97
GlmaxMp05-3	nad5	NADH dehydrogenase subunit 5	267594;268909	267988;269055	542	64668.6	59609.6	58656.9	0.92177	0.333758	0.907038	0.264376	0.984018	0.171996	31443.6	39839.6	33868	32442	32118.8	32364.4	31417.1	32374.4	31584.6
GlmaxMp06	orf271	hypothetical protein	18135	18950	816	5967.06	6299.02	2541.04	1.05563	0.78688	0.425846	0.0402572	0.403403	3.17978e-06	6648	3486.72	4472.63	5014.73	5280.53	5124.75	2125.12	2020.27	2075.09
GlmaxMp07	rp15	ribosomal protein subunit L5	19120	19677	558	15181.2	19217	10239.5	1.26584	0.212765	0.674486	0.145381	0.532839	1.64576e-05	10464.1	5492.8	9456.46	10712.9	10904.2	10552.1	5958.15	5813.85	5369
GlmaxMp08	rps14	ribosomal protein subunit S14	19685	19987	303	24486.1	25458.9	14703.9	1.03973	0.825582	0.600499	0.0768856	0.577553	2.28535e-06	8905.18	4933.53	8419.15	7715.8	7846.04	7580.33	4506.38	4420.14	4439.31
GlmaxMp09	cob	apocytochrome b	20904	22076	1173	44752.3	46047.9	37894.6	1.02895	0.739756	0.846764	0.134557	0.82294	0.00121425	60602.2	46523.8	50357.2	54610.6	54898.4	52533.5	42658.4	45192.3	45500.5
GlmaxMp10	orf129	hypothetical protein	28961	29350	390	82.8964	119.915	119.825	1.44656	0.280996	1.44548	0.212904	0.999255	0.99774	42.2504	19.0585	35.6798	31.3911	45.3422	63.5667	38.3102	41.5668	60.3185
GlmaxMp11	orf152	hypothetical protein	32652	33110	459	112.352	104.619	65.395	0.931171	0.76624	0.582052	0.0610621	0.625075	0.108426	66.5982	41.403	46.7082	64.2091	40.4403	39.4114	24.0807	30.5638	35.4043
GlmaxMp12	orf100a	hypothetical protein	38355	38657	303	55.0182	85.5133	84.4298	1.55427	0.0856572	1.53458	0.291528	0.98733	0.967171	12.1739	16.4298	21.4079	24.2568	31.8621	21.6127	13.1349	26.8961	36.7156
GlmaxMp13	orf287	hypothetical protein	39168	40031	864	15.3614	17.9389	42.6751	1.16779	0.596916	2.77807	0.105997	2.37891	0.142923	15.0383	9.85786	14.9207	14.2687	22.0584	10.1707	16.4187	39.1217	55.0734
GlmaxMp14	orf202	hypothetical protein	40510	41118	609	66.096	99.3497	96.1582	1.50311	0.00526637	1.45483	0.0230616	0.967876	0.74975	36.5216	42.7174	41.5184	54.221	63.7242	63.5667	49.256	64.7953	61.6298
GlmaxMp15	nad3	NADH dehydrogenase subunit 3	42927	43283	357	14914.2	11531.9	15943	0.77322	0.00633145	1.06898	0.0545079	1.38251	0.00219228	5215.06	5228.61	5529.4	4005.94	3828.35	4516.42	5701.11	5531.44	5842.37
GlmaxMp16	rps12	ribosomal protein S12	43332	43709	378	10421.4	11109.9	19812.8	1.06607	0.572413	1.90117	0.000839	1.78335	0.000248844	4341.05	3214.65	4262.12	4017.35	3946	4635.29	7564.08	7195.33	7708.31
GlmaxMp17	atp4	ATPase subunit 4	45493	46074	582	63055.9	62440.5	45260.8	0.990242	0.961321	0.717789	0.206656	0.724862	0.00323153	49463.4	26161.8	34470.3	36826.1	38300.7	33894.4	27043.7	27453.6	24528
GlmaxMp18	rps10	ribosomal protein S10	47253;50332	47502;50444	363	92368.5	98203.4	121073	1.06317	0.689817	1.31076	0.108017	1.23287	0.00360934	43117.3	30484.4	26987.6	36674.1	35623.7	34645.8	44948.3	45384.2	41515.5
GlmaxMp19	cox1	cytochrome c oxidase subunit 1	50644	52227	1584	84471.4	76559.9	94938.7	0.906341	0.151241	1.12392	0.0862898	1.24006	0.00107869	146489	131580	123338	125123	120513	118177	151668	154425	145055
GlmaxMp20-1	nad1	NADH dehydrogenase subunit 1	163153	163539	387	21809.7	25541.4	25445.4	1.1711	0.00992846	1.1667	0.0151379	0.99624	0.885203	8311.88	8029.56	8979.64	9981.67	9615	10056.9	10112.8	9972.36	9456.89
GlmaxMp20-2	nad1	NADH dehydrogenase subunit 1	53706;55229	53786;55420	273	12430.4	21952.3	27132.5	1.76601	0.000336731	2.18275	0.000177501	1.23598	0.00218585	3066.38	3291.87	3822.28	6051.35	5912.87	6014.68	7782.45	7326.76	7112.34
GlmaxMp20-3	nad1	NADH dehydrogenase subunit 1	337279;340687	337537;340745	318	37780.3	44016.8	44095.7	1.16507	0.0399268	1.16716	0.0467687	1.00179	0.949359	12968.4	12254.3	10819.8	14143.1	13612.5	14236.4	14579.8	14003.7	13483.8
GlmaxMp21	ccmFc	cytochrome c biogenesis FC	57359;62238	58137;62787	1329	5695	4793.31	5716.29	0.84167	0.0781785	1.00374	0.959419	1.19256	0.00193586	8570.39	7015.18	7120.4	6246.84	6535.4	6328.7	7887.53	7479.57	7423.76
GlmaxMp22	atp6-1	ATPase subunit 6	63192	63911	720	65879.2	43319.5	36976.3	0.657559	0.198991	0.561275	0.121409	0.853573	0.0308163	28422.4	64834.5	49042.3	29852.3	31559.4	32158.4	24745.7	26227.4	28895.8
GlmaxMp23	orf103a-2	hypothetical protein	68050	68361	312	11.7734	40.8936	45.1471	3.47339	0.0304096	3.83466	0.0857668	1.10401	0.802991	6.44498	2.62876	1.94617	17.1224	12.2546	8.89934	5.47289	17.1157	19.6691
GlmaxMp24	orf110a	hypothetical protein	72935	73267	333	269.636	283.373	184.898	1.05094	0.586789	0.685731	0.0667245	0.65249	0.0354452	100.971	79.5201	88.8753	95.6003	85.7825	101.707	55.8235	48.9021	79.9876
GlmaxMp25	orf110e	hypothetical protein	73183	73515	333	643.164	534.895	497.185	0.831662	0.269264	0.773029	0.127989	0.929499	0.667938	240.613	178.099	223.81	161.236	153.183	219.941	154.335	143.039	199.313
GlmaxMp26	orf109	hypothetical protein	78378	78707	330	1424.48	2073.75	1095.48	1.4558	0.00247527	0.769037	0.0296141	0.528259	9.02296e-05	507.721	413.373	489.138	659.214	702.191	691.606	351.359	341.092	392.07
GlmaxMp27	orf104b	hypothetical protein	83150	83464	315	57.4249	95.9905	135.831	1.67158	0.0538728	2.36537	0.165837	1.41505	0.44284	15.0383	23.6589	15.5694	37.0986	28.1857	25.4267	18.6078	41.5668	68.1861
GlmaxMp28	nad4	NADH dehydrogenase subunit 4	94039;96697;100410;102333	94127;97119;100924;102793	1488	35454	32325.1	35480.8	0.911747	0.200999	1.00076	0.990428	1.09762	0.0058462	47783.8	52267.7	58215.2	47569.7	47891.2	48838.3	53661.1	51220	53505.1
GlmaxMp29	orf106a	hypothetical protein	103968	104288	321	849.785	887.992	1340.5	1.04496	0.750654	1.57746	0.0208033	1.50959	0.00571576	292.173	205.701	320.47	295.362	295.337	264.438	446.588	381.436	462.879
GlmaxMp30	orf114b	hypothetical protein	110588	110932	345	328.177	549.418	508.196	1.67415	0.0543208	1.54854	0.100012	0.92497	0.268895	133.912	58.49	147.26	192.627	177.692	198.328	171.849	161.377	192.757
GlmaxMp31-1	nad2	NADH dehydrogenase subunit 2	133180;134817	133571;134969	545	12564.5	19324.1	16625.8	1.53798	0.00908806	1.32323	0.0483776	0.860366	0.000682173	5852.4	6314.94	8375.68	10600.2	10398.1	10596.6	9331.82	8867.78	8983.52
GlmaxMp31-2	nad2	NADH dehydrogenase subunit 2	318267;319933;323075	318455;320504;323235	922	18418.2	26563	22665.5	1.44221	0.00145546	1.2306	0.0156622	0.853273	8.2213e-05	15208	17260.1	18476.6	24258.9	24512.4	24702	21187.7	20571.9	20933.1
GlmaxMp32	nad4L-1	NADH dehydrogenase subunit 4L	145776	146078	303	30658.8	51842.8	39577.6	1.69096	0.0354686	1.2909	0.257205	0.763416	0.00669625	12895.7	6039.25	8933.91	16015.2	16429.8	14680.1	12011.3	12830.7	11134
GlmaxMp33	nad6	NADH dehydrogenase subunit 6	159159	159818	660	23423.4	22294.8	22817.1	0.951818	0.838248	0.974116	0.91283	1.02343	0.427671	9649.21	21475.3	15253.8	14997.1	14757.7	14389	14446.8	15077.1	15654
GlmaxMp34	orf189	hypothetical protein	160095	160664	570	9310.78	8510.45	7659.95	0.914042	0.39024	0.822697	0.110986	0.900065	0.0296834	5436.34	6024.47	4460.63	5085.36	4826.49	4641.01	4466.42	4399.97	4232.13
GlmaxMp35	ccmB	cytochrome c biogenesis B	164245	164865	621	11720.8	11675.8	8205.8	0.996159	0.972517	0.700105	0.0452619	0.702805	0.00260706	7910.5	5830.27	8095.11	7680.84	6877.31	7193.85	5471.25	5113.94	4702.22
GlmaxMp36	orf117	hypothetical protein	167338	167691	354	957.171	1502.26	792.145	1.56948	0.0319764	0.82759	0.36179	0.527302	0.00101861	381.686	230.674	404.155	569.321	540.43	485.65	311.955	259.181	270.122
GlmaxMp37	orf110b	hypothetical protein	168326	168658	333	771.693	1169.73	598.953	1.51579	0.018676	0.776155	0.174692	0.512046	3.54179e-05	227.723	218.187	325.011	400.95	381.12	386.486	198.119	212.724	187.512
GlmaxMp38	nad7	NADH dehydrogenase subunit 7	170007;171050;172450;173972;176249	170149;171118;172916;174215;176510	1185	35141.9	33429.7	26598.8	0.951279	0.670354	0.756898	0.0820462	0.795663	0.00297855	49032.7	34093.7	41802.8	37802.8	39846	41193.8	32695.6	30050.3	31812.8
GlmaxMp39	atp1-1	ATPase subunit 1	176598	178124	1527	14243.4	18485.1	18024.7	1.2978	0.000886476	1.26548	0.00286512	0.975097	0.253754	22205.7	20337.7	22705.4	28411.1	28028.2	28240.8	28345.7	26572.2	27653.4
GlmaxMp40	orf172-1	hypothetical protein	178245	178763	519	3978.17	11659.3	13873.8	2.93083	3.00878e-05	3.48748	6.76374e-05	1.18993	0.022078	2283.44	2002.35	1908.22	6125.55	5758.46	6269.59	7753.44	6888.47	6959.57
GlmaxMp41	orf167	hypothetical protein	183626	184129	504	117.767	271.979	297.113	2.30946	0.00354848	2.52289	0.00340522	1.09241	0.422856	59.4371	43.3746	75.252	128.418	154.409	128.405	154.335	128.368	166.531
GlmaxMp42	orf102	hypothetical protein	184427	184735	309	121.478	111.184	137.895	0.915262	0.426121	1.13515	0.708424	1.24024	0.553446	40.8182	33.5167	38.2747	34.2449	29.4112	39.4114	18.6078	48.9021	60.3185
GlmaxMp43	orf160a	hypothetical protein	185646	186128	483	24.4729	40.9714	61.9535	1.67415	0.0753884	2.53152	0.155829	1.51212	0.396014	10.0255	10.5151	14.9207	25.6837	17.1565	16.5273	13.1349	28.1187	48.5171
GlmaxMp44	orf113	hypothetical protein	192270	192611	342	495.245	422.262	211.674	0.852633	0.577232	0.427413	0.0859383	0.501286	0.0105465	242.761	103.179	162.181	146.968	129.899	156.374	44.8777	83.1335	89.1665
GlmaxMp45	orf160b	hypothetical protein	205230	205712	483	17185.3	8921.45	6952.73	0.519132	0.0958112	0.404574	0.053425	0.779328	0.0685563	11746.7	5614.05	7540.77	3903.2	4074.67	4949.31	2948.79	3610.2	3515.52
GlmaxMp46	nad4L-2	NADH dehydrogenase subunit 4L	205886	206188	303	29684.8	47502	36862.6	1.60021	0.0574811	1.2418	0.352637	0.776022	0.00948433	12736	5908.14	8339.35	14518.4	15065.9	13595	11189.3	12094.1	10224.6
GlmaxMp47	orf151	hypothetical protein	233099	233554	456	0	0	0							0	0	0	0	0	0	0	0	0
GlmaxMp48	orf261	hypothetical protein	238350	239135	786	20605.3	17453.7	12016.4	0.847049	0.309831	0.583168	0.0296722	0.688471	0.00312965	20087.9	13239.8	15259.6	12541.5	13846.5	14767.8	9080.07	9678.95	9575.56
GlmaxMp49	orf103a-1	hypothetical protein	243522	243833	312	12.8624	26.7646	27.7256	2.08084	0.263856	2.15555	0.129907	1.03591	0.931482	7.16109	0.985786	3.89235	9.27465	3.06366	12.7133	9.30391	5.50148	11.1458
GlmaxMp50	orf139-1	hypothetical protein	243644	244063	420	25.3421	23.6887	15.5482	0.934758	0.788952	0.613531	0.407591	0.656352	0.483733	13.9641	9.85786	8.10906	9.98809	12.8674	6.99234	1.64187	14.6706	3.27818
GlmaxMp51	ccmFn	cytochrome c biogenesis FN	244468	246204	1737	4048.38	2981.79	1585.6	0.736539	0.00618831	0.391662	0.00020092	0.53176	0.000251155	6772.96	7649.7	6673.43	4867.05	5244.99	5426.06	2924.71	2552.69	2785.14
GlmaxMp52	rps4	ribosomal protein S4	249448	250488	1041	6736.84	15174.4	16295.7	2.25246	0.00614951	2.4189	0.00410334	1.07389	0.0124998	9130.39	3735.47	8173.28	15768.3	15823.8	15797.6	17503.9	16696.4	16691.2
GlmaxMp53	rps1	ribosomal protein S1	251220	251837	618	9695.39	21172.9	17873.5	2.18381	0.00380713	1.84351	0.0134636	0.844169	0.00504662	7060.12	3677.64	7237.5	13471.1	12782.2	13001.3	11538.5	10492.6	11106.5
GlmaxMp54	orf101a	hypothetical protein	254685	254990	306	3645.91	8741.33	6967.22	2.39757	0.000204293	1.91097	0.00271378	0.797043	0.00684148	1342.35	959.827	1044.77	2629.72	2736.46	2658.36	2323.24	1980.53	2092.13
GlmaxMp55	atp1-2	ATPase subunit 1	256531	258057	1527	14432	18852.3	18238.8	1.30628	0.000807313	1.26378	0.00431145	0.967459	0.29112	22378.3	20711	23023.7	29321.5	28415.5	28625.4	29065.4	26571.6	27915
GlmaxMp56	orf172-2	hypothetical protein	258178	258696	519	4076.27	11545	13786	2.83226	5.92156e-05	3.38202	8.106e-05	1.19411	0.0192197	2420.57	2013.09	1913.09	6042.79	5703.93	6228.9	7647.81	6738.1	7078.9
GlmaxMp57	orf107a	hypothetical protein	262477	262800	324	121.131	99.6463	126.066	0.822631	0.546929	1.04074	0.905205	1.26514	0.475027	55.1404	24.9732	37.626	38.5255	37.9894	20.3414	31.7428	31.7864	59.0072
GlmaxMp58	orf105a	hypothetical protein	263800	264117	318	78.7663	146.863	175.584	1.86454	0.0410736	2.22918	0.0184255	1.19556	0.212705	37.2377	21.6873	16.2181	44.233	53.9205	41.954	45.9723	59.9051	61.6298
GlmaxMp59	orf107b	hypothetical protein	282026	282349	324	67.9722	66.6471	54.7466	0.980505	0.94213	0.805426	0.534984	0.82144	0.412168	31.5088	13.801	20.7592	19.9762	25.7348	19.07	18.6078	11.003	23.6029
GlmaxMp60	orf100b	hypothetical protein	283975	284277	303	15.7008	22.8296	36.944	1.45404	0.332468	2.353	0.387146	1.61825	0.563476	6.44498	3.28595	4.54107	7.13435	9.80372	3.814	8.75662	1.22255	23.6029
GlmaxMp61	nad9	NADH dehydrogenase subunit 9	289148	289720	573	96047	47663.8	53625.6	0.496255	0.0614957	0.558327	0.0896987	1.12508	0.165134	34871.7	71512.5	58720.6	26257.3	27174.7	28502.1	28311.8	29381.6	34489.1
GlmaxMp62	orf105b	hypothetical protein	291547	291864	318	429.511	734.472	251.517	1.71002	0.0135945	0.585589	0.0273931	0.342446	0.000995443	167.57	116.98	125.204	201.189	241.417	258.081	68.9584	83.1335	87.8552
GlmaxMp63	orf110c	hypothetical protein	294619	294951	333	49.1174	135.167	153.926	2.75192	0.00210834	3.13385	0.00750919	1.13878	0.381581	15.0383	23.0017	11.0283	41.3792	45.3422	48.3107	41.594	62.3502	49.8283
GlmaxMp64	orf101b	hypothetical protein	299196	299501	306	116.171	92.1381	118.753	0.793125	0.331474	1.02222	0.962519	1.28886	0.602429	45.831	37.4599	23.3541	27.1105	26.9602	30.512	7.66204	48.9021	52.4509
GlmaxMp65	orf136a	hypothetical protein	300598	301008	411	156.659	217.938	163.183	1.39116	0.296829	1.04165	0.911609	0.748759	0.327384	90.2298	33.5167	69.4135	64.2091	106.615	97.8928	37.2156	89.2463	74.7425
GlmaxMp66	orf103b	hypothetical protein	302060	302371	312	168.023	136.928	191.535	0.814938	0.575674	1.13994	0.71688	1.3988	0.299789	75.1915	26.2876	55.7903	57.0748	36.7639	34.326	35.0265	72.1306	72.1199
GlmaxMp67	orf215	hypothetical protein	304939	305586	648	723.165	654.592	444.923	0.905176	0.691565	0.615243	0.165219	0.679695	0.00324687	667.414	315.452	422.968	425.207	425.236	422.083	259.415	275.074	330.44
GlmaxMp68	orf106b	hypothetical protein	306632	306952	321	234.361	284.811	228.523	1.21527	0.427808	0.975089	0.930258	0.802366	0.293089	103.12	47.3177	75.252	108.442	87.008	78.8227	49.256	85.5787	85.2327
GlmaxMp69	rpl16	ribosomal protein L16	308110	308625	516	14345.7	12113.2	16403.3	0.844377	0.412572	1.14343	0.449136	1.35417	0.000371277	9771.31	5494.44	6941.35	6107	6467.39	6176.78	8330.83	8793.21	8268.22
GlmaxMp70	rps3	ribosomal protein S3	308516;311507	310130;311580	1689	7628.55	9221.63	7645.09	1.20883	0.401554	1.00217	0.992717	0.829039	0.00067043	17059.9	7395.37	14198.6	15317.4	15822	15586.6	13354.4	12842.9	12540.3
GlmaxMp71	orf114a	hypothetical protein	328168	328512	345	175.509	1768.79	1580.52	10.078	0.00470266	9.00534	0.000507985	0.893562	0.57112	90.2298	46.6605	44.762	724.85	685.035	420.812	559.329	614.944	461.568
GlmaxMp72	atp9	ATPase subunit 9	328658	328882	225	211588	222168	267280	1.05	0.282023	1.26321	0.00536298	1.20306	0.00248037	49539.7	49315.6	43966.7	50407.7	48812.7	50742.8	58781	62888.7	58744.3
GlmaxMp73	matR	maturase	338030	340036	2007	4469.66	5672.76	6168.63	1.26917	0.000589443	1.38011	0.00432422	1.08741	0.161497	9330.19	8753.45	8828.17	11547.7	11551.2	11056.8	13078.6	11280.5	12782.3
GlmaxMp74	orf100c	hypothetical protein	348633	348935	303	163.876	137.17	158.589	0.837032	0.430593	0.967737	0.908686	1.15615	0.647591	54.4243	36.8027	57.7365	28.5374	46.5677	49.582	30.6482	44.0119	69.4974
GlmaxMp75	orf136b	hypothetical protein	350934	351344	411	832.355	1084.47	650.357	1.3029	0.238292	0.781346	0.371612	0.599699	0.000653474	448.284	201.1	376.909	473.721	436.266	427.168	262.699	249.401	289.791
GlmaxMp76	cox2	cytochrome c oxidase subunit 2	352394	353176	783	1002.76	1103.25	998.893	1.10021	0.524116	0.996147	0.980339	0.905414	0.158659	797.746	590.157	967.573	914.623	814.934	861.965	754.164	735.976	856.26
GlmaxMp77	orf241	hypothetical protein	353250	353975	726	2356.5	3023.13	2545.04	1.28289	0.0324299	1.08001	0.416097	0.841856	0.000492041	2005.11	1524.03	1603.32	2205.94	2226.06	2152.37	1797.3	1877.23	1868.56
GlmaxMp78	atp1-3	ATPase subunit 1	355252	356778	1527	14403.2	18767.8	18159.9	1.30303	0.00130839	1.26082	0.00564614	0.967605	0.260526	22496.6	20409.6	23075	28906	28294.8	28774.8	28922	26552	27716.3
GlmaxMp79	orf172-3	hypothetical protein	356899	357417	519	4132.48	11624.6	13713.6	2.81298	7.23416e-05	3.31849	0.000163118	1.17971	0.0393878	2468.91	2042.66	1922.71	6017.82	5763.77	6317.9	7753.44	6711.2	6887.45
GlmaxMp80	atp6-2	ATPase subunit 6	361726	362445	720	65984.5	43649.5	37086.9	0.661513	0.201155	0.562055	0.120019	0.849651	0.0399249	28625.7	64827.9	49072.8	29683.9	31687.5	32911.7	24746.2	26297.1	29064.3
GlmaxMp81	orf110d	hypothetical protein	367618	367950	333	167.21	197.249	111.01	1.17965	0.357682	0.663893	0.310316	0.562789	0.0932863	67.3143	36.8027	62.9263	68.4897	63.7242	64.8381	10.9458	50.1246	49.8283
GlmaxMp82	atp8	ATPase subunit 8	375464	375946	483	130820	96521.3	90835.3	0.737817	0.136818	0.694353	0.10297	0.941091	0.279331	46357	76683.6	66517.6	46035.1	46521.7	47302.5	40734.7	42859	48026.6
GlmaxMp83	orf145	hypothetical protein	386742	387179	438	487.237	394.903	190.561	0.810495	0.130893	0.391105	0.00590381	0.482551	0.00423498	244.193	175.47	220.566	186.92	165.438	166.545	65.6747	74.5757	110.147
GlmaxMp84	orf103c	hypothetical protein	393005	393316	312	0	0	0							0	0	0	0	0	0	0	0	0
GlmaxMp85	orf178	hypothetical protein	393732	394268	537	1710.69	1513.29	804.122	0.884609	0.174873	0.470057	0.0011925	0.531372	0.000312117	954.573	994.987	806.365	763.375	810.032	864.508	459.723	409.555	426.163
GlmaxMp86	orf139-2	hypothetical protein	394673	395092	420	35.4587	29.1586	18.7139	0.822328	0.51293	0.527766	0.144279	0.641796	0.0798314	21.8413	10.1865	12.6501	14.2687	11.0292	11.442	6.02018	11.003	6.55636
GlmaxMp87	orf103d	hypothetical protein	394903	395214	312	17.12	22.318	27.0407	1.30362	0.337369	1.57948	0.120669	1.21161	0.141598	7.8772	2.95736	5.1898	7.13435	6.12732	7.62801	7.66204	9.78042	7.86763
GlmaxMp88	mttB	transport membrane protein	400971	401693	723	5521.61	6481.82	5031.61	1.1739	0.0341607	0.911258	0.130743	0.776264	0.00318658	3682.95	4037.78	4255.63	4695.83	4928.82	4434.42	3650.42	3776.46	3486.67
Transcripts with yellow color represents differential expression between N and R, SR and R, or SR and N (fold change > 1.5 or <0.067, p-value <0.05).

## Sheet: Table S2
Table S2. RNA edited sites in the mitochondrial genome identified in this study. (648 sites with >=15% editing in at least 1 condition)
Position	SNP	Strand	Gene	Gene name	Gene description	Tran-splicing?	Overlapped feature	Codon change	Amino acid change	Non-synonymous?							Root average edited percent (%)							Stripped root average edited percent (%)							Nodule average edited percent (%)				Gene name	Position
											Total reads	Edited percent (%)	Total reads	Edited percent (%)	Total reads	Edited percent (%)		Total reads	Edited percent (%)	Total reads	Edited percent (%)	Total reads	Edited percent (%)		Total reads	Edited percent (%)	Total reads	Edited percent (%)	Total reads	Edited percent (%)		SR - R	N - R	N - SR
1728	C<->T	+	GlmaxMp01	ccmC	cytochrome c biogenesis C	no	CDS	CGG<->TGG	R<->W	yes	1694	96.1	2042	97.8	2913	96.33	96.7433	1589	94.21	1926	94.5	1833	93.84	94.1833	1080	94.54	964	92.53	849	93.76	93.61	-2.56	-3.13333	-0.573333	ccmC	1728
1755	C<->T	+	GlmaxMp01	ccmC	cytochrome c biogenesis C	no	CDS	CAT<->TAT	H<->Y	yes	1689	94.08	2112	97.02	3014	95.16	95.42	1685	93.36	2103	92.55	2018	91.04	92.3167	1140	92.38	1025	90.07	876	92.7	91.7167	-3.10333	-3.70333	-0.6	ccmC	1755
1767	C<->T	+	GlmaxMp01	ccmC	cytochrome c biogenesis C	no	CDS	CGG<->TGG	R<->W	yes	1835	94.39	2297	97.61	3256	96.31	96.1033	1729	95.21	2174	94.76	2071	93.68	94.55	1161	95.44	1031	92.74	901	95.23	94.47	-1.55333	-1.63333	-0.08	ccmC	1767
1785	C<->T	+	GlmaxMp01	ccmC	cytochrome c biogenesis C	no	CDS	CTT<->TTT	L<->F	yes	1897	93.62	2261	97.26	3169	95.55	95.4767	1811	96.36	2262	95.53	2093	93.94	95.2767	1188	96.56	1041	95	908	95.71	95.7567	-0.2	0.28	0.48	ccmC	1785
1831	C<->T	+	GlmaxMp01	ccmC	cytochrome c biogenesis C	no	CDS	GCG<->GTG	A<->V	yes	2279	96.93	2311	98.49	3195	97.4	97.6067	1659	95.96	2044	95.02	1910	94.46	95.1467	1057	96.41	916	95.97	824	94.42	95.6	-2.46	-2.00667	0.453333	ccmC	1831
1836	C<->T	+	GlmaxMp01	ccmC	cytochrome c biogenesis C	no	CDS	CGG<->TGG	R<->W	yes	2361	97.12	2490	98.76	3293	97.48	97.7867	1581	95.26	1957	95.71	1794	94.88	95.2833	1034	93.73	868	95.16	786	92.24	93.71	-2.50333	-4.07667	-1.57333	ccmC	1836
1933	C<->T	+	GlmaxMp01	ccmC	cytochrome c biogenesis C	no	CDS	ACA<->ATA	T<->I	yes	4276	97.64	3119	98.49	4056	97.83	97.9867	1687	96.33	2073	95.71	1909	95.18	95.74	1210	95.62	1000	95.3	910	95.06	95.3267	-2.24667	-2.66	-0.413333	ccmC	1933
1983	C<->T	+	GlmaxMp01	ccmC	cytochrome c biogenesis C	no	CDS	CGG<->TGG	R<->W	yes	5107	96.22	3069	97.46	3993	95.67	96.45	1840	91.97	2194	91.39	2059	91.31	91.5567	1316	93.55	1150	91.66	1068	92.7	92.6367	-4.89333	-3.81333	1.08	ccmC	1983
2047	C<->T	+	GlmaxMp01	ccmC	cytochrome c biogenesis C	no	CDS	TCG<->TTG	S<->L	yes	4532	98.15	2979	99.36	3548	98.31	98.6067	2903	97.66	3283	97.81	3134	97.89	97.7867	1976	98.43	1807	97.9	1578	97.47	97.9333	-0.82	-0.673333	0.146667	ccmC	2047
2052	C<->T	+	GlmaxMp01	ccmC	cytochrome c biogenesis C	no	CDS	CTG<->TTG	L<->L	no	4644	17.59	3190	21.76	3744	18.83	19.3933	2937	10.45	3333	9.75	3194	10.14	10.1133	2021	14.35	1836	15.84	1602	14.78	14.99	-9.28	-4.40333	4.87667	ccmC	2052
2073	C<->T	+	GlmaxMp01	ccmC	cytochrome c biogenesis C	no	CDS	CGT<->TGT	R<->C	yes	3908	89.51	3069	96.16	3730	92.44	92.7033	3002	95.9	3378	96.57	3213	95.62	96.03	2048	97.9	1913	96.97	1602	96.51	97.1267	3.32667	4.42333	1.09667	ccmC	2073
2088	C<->T	+	GlmaxMp01	ccmC	cytochrome c biogenesis C	no	CDS	CCT<->TCT	P<->S	yes	4063	97.27	3408	99.18	3932	98.32	98.2567	3344	97.01	3759	97.95	3504	97.43	97.4633	2248	97.78	2101	97.34	1765	97.05	97.39	-0.793333	-0.866667	-0.0733333	ccmC	2088
2098	C<->T	+	GlmaxMp01	ccmC	cytochrome c biogenesis C	no	CDS	CCG<->CTG	P<->L	yes	3734	94.73	3230	98.67	3744	97.46	96.9533	3270	96.79	3672	96.76	3385	97.23	96.9267	2205	97.01	2061	95.92	1702	96.94	96.6233	-0.0266667	-0.33	-0.303333	ccmC	2098
2103	C<->T	+	GlmaxMp01	ccmC	cytochrome c biogenesis C	no	CDS	CCT<->TCT	P<->S	yes	3620	80.25	3347	88.44	3780	83.37	84.02	3147	84.59	3572	85.48	3254	85.94	85.3367	2126	80.17	2002	79.63	1658	81.8	80.5333	1.31667	-3.48667	-4.80333	ccmC	2103
2110	C<->T	+	GlmaxMp01	ccmC	cytochrome c biogenesis C	no	CDS	TCA<->TTA	S<->L	yes	3831	94.08	3650	98.14	4074	97.23	96.4833	3147	96.09	3583	95.79	3231	96.26	96.0467	2113	97.44	1998	95.75	1665	96.58	96.59	-0.436667	0.106667	0.543333	ccmC	2110
2115	C<->T	+	GlmaxMp01	ccmC	cytochrome c biogenesis C	no	CDS	CGT<->TGT	R<->C	yes	3826	93.67	3709	97.92	4105	96.62	96.07	3141	94.59	3592	94.96	3234	95.15	94.9	2123	95.05	2016	92.91	1672	93.42	93.7933	-1.17	-2.27667	-1.10667	ccmC	2115
2119	C<->T	+	GlmaxMp01	ccmC	cytochrome c biogenesis C	no	CDS	GCT<->GTT	A<->V	yes	3683	82.27	3716	90.88	4090	86.95	86.7	3151	87.98	3601	88.58	3238	87.28	87.9467	2130	80.99	2008	80.09	1671	82.74	81.2733	1.24667	-5.42667	-6.67333	ccmC	2119
2125	C<->T	+	GlmaxMp01	ccmC	cytochrome c biogenesis C	no	CDS	CCG<->CTG	P<->L	yes	3617	91.95	3772	97.16	4106	95.3	94.8033	3058	92.05	3536	92.51	3158	92.53	92.3633	2051	92.35	1962	91.54	1617	93.01	92.3	-2.44	-2.50333	-0.0633333	ccmC	2125
2129	C<->T	+	GlmaxMp01	ccmC	cytochrome c biogenesis C	no	CDS	ATC<->ATT	I<->I	no	3827	42.23	3971	42.99	4227	36.31	40.51	3216	27.29	3736	25.65	3328	23.99	25.6433	2195	14.02	2098	16.11	1721	15.03	15.0533	-14.8667	-25.4567	-10.59	ccmC	2129
2149	C<->T	+	GlmaxMp01	ccmC	cytochrome c biogenesis C	no	CDS	TCT<->TTT	S<->F	yes	4222	93.72	4652	97.91	4790	96.33	95.9867	3209	96.76	3716	97.23	3399	96.86	96.95	2256	96.86	2144	95.25	1757	95.34	95.8167	0.963333	-0.17	-1.13333	ccmC	2149
2200	C<->T	+	GlmaxMp01	ccmC	cytochrome c biogenesis C	no	CDS	TCT<->TTT	S<->F	yes	4167	96.04	5774	99	5416	97.66	97.5667	3553	97.3	3984	96.79	3707	97.11	97.0667	2443	98.36	2349	97.02	1951	97.54	97.64	-0.5	0.0733333	0.573333	ccmC	2200
2220	C<->T	+	GlmaxMp01	ccmC	cytochrome c biogenesis C	no	CDS	CCT<->TCT	P<->S	yes	4305	96.61	6254	99.57	5838	98.53	98.2367	3722	96.08	4167	96.09	3885	96.53	96.2333	2599	98.15	2442	97.26	2076	97.35	97.5867	-2.00333	-0.65	1.35333	ccmC	2220
2227	C<->T	+	GlmaxMp01	ccmC	cytochrome c biogenesis C	no	CDS	CCC<->CTC	P<->L	yes	4238	94.24	6271	98.39	5757	96.37	96.3333	3695	94.67	4118	93.91	3786	94.61	94.3967	2599	95.19	2431	93.59	2098	93.76	94.18	-1.93667	-2.15333	-0.216667	ccmC	2227
2260	C<->T	+	GlmaxMp01	ccmC	cytochrome c biogenesis C	no	CDS	CCC<->CTC	P<->L	yes	3734	95.72	5665	98.92	5256	97.89	97.51	3414	97.8	4518	97.7	3884	96.73	97.41	2639	98.18	2333	97.17	2122	97.03	97.46	-0.1	-0.05	0.05	ccmC	2260
2266	C<->T	+	GlmaxMp01	ccmC	cytochrome c biogenesis C	no	CDS	TCA<->TTA	S<->L	yes	3677	96.87	5626	99.11	5227	98.47	98.15	3420	98.51	4513	98.27	3886	98.18	98.32	2649	98.76	2353	97.58	2120	97.97	98.1033	0.17	-0.0466667	-0.216667	ccmC	2266
2271	C<->T	+	GlmaxMp01	ccmC	cytochrome c biogenesis C	no	CDS	CGT<->TGT	R<->C	yes	3862	96.09	5885	98.71	5475	97.99	97.5967	3330	97.75	4428	97.61	3796	97.58	97.6467	2589	98.19	2301	96.05	2080	96.63	96.9567	0.05	-0.64	-0.69	ccmC	2271
2276	C<->T	+	GlmaxMp01	ccmC	cytochrome c biogenesis C	no	CDS	ATC<->ATT	I<->I	no	3775	95.15	5795	97.77	5391	96.77	96.5633	3371	95.7	4501	95.47	3872	95.2	95.4567	2654	96.38	2340	95	2130	95.08	95.4867	-1.10667	-1.07667	0.03	ccmC	2276
2302	C<->T	+	GlmaxMp01	ccmC	cytochrome c biogenesis C	no	CDS	CCT<->CTT	P<->L	yes	3605	97.78	5754	99.06	5355	99.14	98.66	2818	98.4	3890	98.35	3288	98.57	98.44	2216	98.47	1877	96.91	1805	97.18	97.52	-0.22	-1.14	-0.92	ccmC	2302
2317	C<->T	+	GlmaxMp01	ccmC	cytochrome c biogenesis C	no	CDS	CCC<->TTC	P<->F	yes	4099	95.49	5846	97.79	5836	97.31	96.8633	2713	96.72	3813	97.06	3180	96.51	96.7633	2180	96.83	1818	95.82	1774	96.51	96.3867	-0.1	-0.476667	-0.376667	ccmC	2317
2325	C<->T	+	GlmaxMp01	ccmC	cytochrome c biogenesis C	no	CDS	CCT<->TCT	P<->S	yes	4248	96.49	5895	98.13	5944	97.36	97.3267	2696	95.44	3828	94.15	3192	94.9	94.83	2202	93.19	1859	91.72	1799	92.28	92.3967	-2.49667	-4.93	-2.43333	ccmC	2325
11151	C<->T	+	GlmaxMp04	cox3	cytochrome c oxidase subunit III	no	CDS	CCT<->CTT	P<->L	yes	5740	97.06	5850	96.92	6624	97.36	97.1133	3163	98.1	3854	97.33	3756	97.6	97.6767	7014	99.63	7067	99.28	6641	99.28	99.3967	0.563333	2.28333	1.72	cox3	11151
11163	C<->T	+	GlmaxMp04	cox3	cytochrome c oxidase subunit III	no	CDS	TCT<->TTT	S<->F	yes	6587	96.27	6654	96.48	7154	96.63	96.46	3243	96.11	3991	95.79	3907	95.98	95.96	7123	99.23	7204	99.02	6879	99.1	99.1167	-0.5	2.65667	3.15667	cox3	11163
11169	C<->T	+	GlmaxMp04	cox3	cytochrome c oxidase subunit III	no	CDS	CCG<->CTG	P<->L	yes	6775	97.3	6793	96.85	7246	96.96	97.0367	3254	95.64	4014	94.9	3932	95.25	95.2633	7175	96.36	7214	96.59	6891	96.57	96.5067	-1.77333	-0.53	1.24333	cox3	11169
11195	C<->T	+	GlmaxMp04	cox3	cytochrome c oxidase subunit III	no	CDS	CTT<->TTT	L<->F	yes	7198	98.58	7024	98.32	7137	98.32	98.4067	3433	98.28	4252	97.93	4163	97.98	98.0633	7266	99.34	7370	99.23	7186	99.28	99.2833	-0.343333	0.876667	1.22	cox3	11195
11210	C<->T	+	GlmaxMp04	cox3	cytochrome c oxidase subunit III	no	CDS	CGG<->TGG	R<->W	yes	5996	98.13	6040	97.86	6404	97.74	97.91	3156	96.65	3947	96.68	3917	96.84	96.7233	6694	98.81	6776	98.64	6648	98.78	98.7433	-1.18667	0.833333	2.02	cox3	11210
11217	C<->T	+	GlmaxMp04	cox3	cytochrome c oxidase subunit III	no	CDS	TCT<->TTT	S<->F	yes	5195	98.33	5617	97.97	5789	98.01	98.1033	2798	97.08	3530	97.12	3504	97.55	97.25	5791	99.29	5889	99.17	5831	98.97	99.1433	-0.853333	1.04	1.89333	cox3	11217
11220	C<->T	+	GlmaxMp04	cox3	cytochrome c oxidase subunit III	no	CDS	TCT<->TTT	S<->F	yes	5131	96.96	5517	96.63	5631	96.79	96.7933	2783	95.02	3483	95.24	3475	94.81	95.0233	5748	98.82	5811	98.87	5780	98.6	98.7633	-1.77	1.97	3.74	cox3	11220
11294	C<->T	+	GlmaxMp04	cox3	cytochrome c oxidase subunit III	no	CDS	CGG<->TGG	R<->W	yes	7194	97.41	7211	97.57	7424	97.87	97.6167	3310	97.25	4164	97.57	4044	97.03	97.2833	8506	99.37	8124	99.48	7186	99.36	99.4033	-0.333333	1.78667	2.12	cox3	11294
11319	C<->T	+	GlmaxMp04	cox3	cytochrome c oxidase subunit III	no	CDS	CCT<->CTT	P<->L	yes	7483	98.73	7259	98.48	7519	98.8	98.67	3242	97.07	4016	96.89	3902	97.05	97.0033	8223	98.38	7894	98.23	7056	98.29	98.3	-1.66667	-0.37	1.29667	cox3	11319
11418	C<->T	+	GlmaxMp04	cox3	cytochrome c oxidase subunit III	no	CDS	TCA<->TTA	S<->L	yes	6424	97.37	6577	96.08	6580	96.61	96.6867	4642	90.5	5634	90.95	5473	93.06	91.5033	8919	95.5	8959	95.79	8684	96.9	96.0633	-5.18333	-0.623333	4.56	cox3	11418
11509	C<->T	+	GlmaxMp04	cox3	cytochrome c oxidase subunit III	no	CDS	TTC<->TTT	F<->F	no	7373	20.45	7601	21.91	7758	19.09	20.4833	5365	13.84	6607	13.98	6436	13.55	13.79	7236	9.47	7293	10.83	7389	9.93	10.0767	-6.69333	-10.4067	-3.71333	cox3	11509
11660	C<->T	+	GlmaxMp04	cox3	cytochrome c oxidase subunit III	no	CDS	CGG<->TGG	R<->W	yes	4477	99.6	5192	99.61	5312	99.27	99.4933	3480	98.99	4234	99.08	4107	99.15	99.0733	4788	99.65	5005	99.68	5017	99.7	99.6767	-0.42	0.183333	0.603333	cox3	11660
19154	C<->T	+	GlmaxMp07	rp15	ribosomal protein subunit L5	no	CDS	TCA<->TTA	S<->L	yes	2836	88.41	2481	88.43	4344	89.85	88.8967	2731	93.34	3247	92.52	3003	91.52	92.46	1919	89.74	1781	91.75	1483	88.27	89.92	3.56333	1.02333	-2.54	rp15	19154
19166	C<->T	+	GlmaxMp07	rp15	ribosomal protein subunit L5	no	CDS	CCG<->TTG	P<->L	yes	3015	59.7	2600	69.27	4542	66.6	65.19	2565	68.38	3085	67.92	2860	63.22	66.5067	1832	75.4	1696	70.39	1405	73.24	73.01	1.31667	7.82	6.50333	rp15	19166
19183	C<->T	+	GlmaxMp07	rp15	ribosomal protein subunit L5	no	CDS	CAC<->TAC	H<->Y	yes	3134	45.72	2591	53.28	4455	52.17	50.39	2509	59.39	3026	61.2	2808	57.84	59.4767	1798	55.85	1686	51.81	1369	52.22	53.2933	9.08667	2.90333	-6.18333	rp15	19183
19211	C<->T	+	GlmaxMp07	rp15	ribosomal protein subunit L5	no	CDS	TCG<->TTG	S<->L	yes	3337	86.87	2589	88.03	4461	88.86	87.92	2158	90.43	2521	89.58	2305	89	89.67	1595	93.23	1389	93.18	1161	90.01	92.14	1.75	4.22	2.47	rp15	19211
19288	C<->T	+	GlmaxMp07	rp15	ribosomal protein subunit L5	no	CDS	CGC<->TGC	R<->C	yes	3553	84.01	2188	85.42	3836	86.13	85.1867	2200	85.6	2544	85.93	2253	83.9	85.1433	1542	93.64	1314	92.32	1076	91.08	92.3467	-0.0433333	7.16	7.20333	rp15	19288
19436	C<->T	+	GlmaxMp07	rp15	ribosomal protein subunit L5	no	CDS	TCG<->TTG	S<->L	yes	4209	85.41	1928	82.52	3728	86.99	84.9733	2598	79.64	3111	82.08	2823	80.5	80.74	1811	84.4	1546	85.32	1234	85.59	85.1033	-4.23333	0.13	4.36333	rp15	19436
19448	C<->T	+	GlmaxMp07	rp15	ribosomal protein subunit L5	no	CDS	TCG<->TTG	S<->L	yes	4640	85.24	2095	83.98	4077	88.5	85.9067	2646	82.22	3177	84.97	2936	82.15	83.1133	1853	82.86	1590	84.42	1290	83.51	83.5967	-2.79333	-2.31	0.483333	rp15	19448
19631	C<->T	+	GlmaxMp07	rp15	ribosomal protein subunit L5	no	CDS	CCA<->CTA	P<->L	yes	6047	72.38	3661	71.7	6322	69.24	71.1067	2738	58.73	3235	63.11	3185	59.83	60.5567	2239	40.02	1987	42.58	1735	41.38	41.3267	-10.55	-29.78	-19.23	rp15	19631
19634	C<->T	+	GlmaxMp07	rp15	ribosomal protein subunit L5	no	CDS	CCG<->CTG	P<->L	yes	5999	82.45	3653	82.9	6336	81.85	82.4	2707	70.95	3207	74.35	3134	74.12	73.14	2195	57.17	1957	57.05	1703	60.36	58.1933	-9.26	-24.2067	-14.9467	rp15	19634
19694	C<->T	+	GlmaxMp08	rps14	ribosomal protein subunit S14	no	CDS	CAG<->TAG	Q<->U	yes	5443	15.52	3084	18.22	5525	17.82	17.1867	2861	11.24	3345	10.28	3289	10.52	10.68	2274	15.16	1997	14.66	1806	14.22	14.68	-6.50667	-2.50667	4	rps14	19694
19878	C<->T	+	GlmaxMp08	rps14	ribosomal protein subunit S14	no	CDS	TCC<->TTC	S<->F	yes	5451	95.51	3268	95.72	5610	95.61	95.6133	3314	95.27	4076	96.32	3894	95.66	95.75	2624	97.56	2379	95.84	2109	95.83	96.41	0.136667	0.796667	0.66	rps14	19878
19955	C<->T	+	GlmaxMp08	rps14	ribosomal protein subunit S14	no	CDS	CCT<->TCT	P<->S	yes	6872	91.87	4148	93.83	6537	91.74	92.48	2995	94.73	3633	95.63	3449	95.19	95.1833	2381	96.77	2145	94.6	1865	95.72	95.6967	2.70333	3.21667	0.513333	rps14	19955
20944	C<->T	+	GlmaxMp09	cob	apocytochrome b	no	CDS	TCC<->TTC	S<->F	yes	7247	95.87	6844	96.48	7296	96.3	96.2167	5125	93.77	6105	94.84	5461	95.33	94.6467	5318	96.72	4964	96.98	4707	96.73	96.81	-1.57	0.593333	2.16333	cob	20944
21016	C<->T	+	GlmaxMp09	cob	apocytochrome b	no	CDS	TCG<->TTG	S<->L	yes	7498	28.08	6763	30.85	7149	26.86	28.5967	5241	38.75	6226	41.22	5543	37.92	39.2967	5435	13.88	5266	14.4	4894	14.34	14.2067	10.7	-14.39	-25.09	cob	21016
21183	C<->T	+	GlmaxMp09	cob	apocytochrome b	no	CDS	CTC<->TTC	L<->F	yes	6411	98.55	5802	99.29	5776	98.94	98.9267	6550	98.66	7943	98.43	7155	98.67	98.5867	6913	99.08	6744	99.17	6065	98.83	99.0267	-0.34	0.1	0.44	cob	21183
21195	C<->T	+	GlmaxMp09	cob	apocytochrome b	no	CDS	CAC<->TAC	H<->Y	yes	7467	97.78	7333	99.06	7677	98.12	98.32	7009	96.95	8366	97.45	7605	97.55	97.3167	7363	98.45	7121	98.29	6415	98.38	98.3733	-1.00333	0.0533333	1.05667	cob	21195
21222	C<->T	+	GlmaxMp09	cob	apocytochrome b	no	CDS	CAT<->TAT	H<->Y	yes	7639	97.34	7494	98.35	8116	97.38	97.69	7432	97.07	8474	97.41	8029	97.27	97.25	7703	98.07	7527	97.99	6696	98.21	98.09	-0.44	0.4	0.84	cob	21222
21255	C<->T	+	GlmaxMp09	cob	apocytochrome b	no	CDS	CGG<->TGG	R<->W	yes	7511	96.7	7224	97.79	7831	96.53	97.0067	8055	95.57	8344	95.78	8269	95.26	95.5367	8263	98.9	8090	98.85	7668	98.64	98.7967	-1.47	1.79	3.26	cob	21255
21304	C<->T	+	GlmaxMp09	cob	apocytochrome b	no	CDS	ACA<->ATA	T<->I	yes	7810	99.13	7491	99.29	7949	98.74	99.0533	7256	98.36	7041	98.27	7362	98.4	98.3433	7285	98.88	7351	98.82	7247	98.87	98.8567	-0.71	-0.196667	0.513333	cob	21304
21465	C<->T	+	GlmaxMp09	cob	apocytochrome b	no	CDS	CAT<->TAT	H<->Y	yes	7099	98.2	6847	99.12	7158	98.84	98.72	6412	98.53	6341	98.87	6509	98.79	98.73	6515	99.2	6369	99.03	5651	98.94	99.0567	0.01	0.336667	0.326667	cob	21465
21507	C<->T	+	GlmaxMp09	cob	apocytochrome b	no	CDS	CTG<->TTG	L<->L	no	6398	29.15	6960	21.18	8104	19.26	23.1967	5145	11.68	5917	11.88	5311	12.24	11.9333	5104	10.53	5091	10.83	4482	9.39	10.25	-11.2633	-12.9467	-1.68333	cob	21507
21705	C<->T	+	GlmaxMp09	cob	apocytochrome b	no	CDS	CCC<->TCC	P<->S	yes	7595	98.84	7129	99.17	7891	99.21	99.0733	5528	98.97	6631	98.36	6334	98.31	98.5467	5820	99.07	5382	98.98	5046	99.03	99.0267	-0.526667	-0.0466667	0.48	cob	21705
21750	C<->T	+	GlmaxMp09	cob	apocytochrome b	no	CDS	CAT<->TAT	H<->Y	yes	7537	99.35	7482	99.51	7963	99.31	99.39	4743	98.51	5734	98.4	5548	98.5	98.47	5098	99.22	4604	99.41	4327	99.12	99.25	-0.92	-0.14	0.78	cob	21750
21805	C<->T	+	GlmaxMp09	cob	apocytochrome b	no	CDS	CCA<->TTA	P<->L	yes	7542	99.02	7531	99.44	7849	98.99	99.15	4815	98.41	5746	97.74	5410	98.08	98.0767	4987	98.98	4576	99.32	4203	98.67	98.99	-1.07333	-0.16	0.913333	cob	21805
21879	C<->T	+	GlmaxMp09	cob	apocytochrome b	no	CDS	CAC<->TAC	H<->Y	yes	7017	97.38	7583	98.25	7959	95.65	97.0933	5220	95.02	6011	95.34	5649	94.83	95.0633	5321	95.36	5117	96.27	4469	95.32	95.65	-2.03	-1.44333	0.586667	cob	21879
21912	C<->T	+	GlmaxMp09	cob	apocytochrome b	no	CDS	CGC<->TGC	R<->C	yes	7994	99.22	7643	99.33	8000	98.9	99.15	6176	99.04	7107	98.71	6688	98.54	98.7633	6270	99.28	6168	99.48	5408	99.17	99.31	-0.386667	0.16	0.546667	cob	21912
21978	C<->T	+	GlmaxMp09	cob	apocytochrome b	no	CDS	CCT<->TCT	P<->S	yes	7617	98.91	7215	99.57	7264	98.83	99.1033	6096	98.95	6925	98.76	6664	98.58	98.7633	6010	99.37	5949	99.43	5547	99.24	99.3467	-0.34	0.243333	0.583333	cob	21978
21981	C<->T	+	GlmaxMp09	cob	apocytochrome b	no	CDS	CCT<->TCT	P<->S	yes	7572	97.77	7203	99	7216	96.8	97.8567	6076	98.34	6917	97.85	6657	97.73	97.9733	5992	98.98	5949	99.19	5538	98.99	99.0533	0.116667	1.19667	1.08	cob	21981
22021	C<->T	+	GlmaxMp09	cob	apocytochrome b	no	CDS	CCG<->CTG	P<->L	yes	6136	98.92	6008	98.93	6100	98.82	98.89	5515	98.35	5819	98.21	5752	98.18	98.2467	5466	99.32	5532	99.21	4981	99.4	99.31	-0.643333	0.42	1.06333	cob	22021
42931	C<->T	+	GlmaxMp15	nad3	NADH dehydrogenase subunit 3	no	CDS	TCA<->TTA	S<->L	yes	3476	78.16	3509	84.24	3340	81.56	81.32	1398	75.89	1557	74.45	1819	75.43	75.2567	2528	86.48	2112	87.98	2054	86.33	86.93	-6.06333	5.61	11.6733	nad3	42931
43006	C<->T	+	GlmaxMp15	nad3	NADH dehydrogenase subunit 3	no	CDS	CCC<->TTC	P<->F	yes	2828	83.6	3240	89.08	3345	87.47	86.7167	1292	81.81	1348	81.1	1566	80.2	81.0367	2332	90.18	1948	90.31	1931	88.15	89.5467	-5.68	2.83	8.51	nad3	43006
43134	C<->T	+	GlmaxMp15	nad3	NADH dehydrogenase subunit 3	no	CDS	CCT<->TCT	P<->S	yes	2171	81.76	2787	88.81	3376	85.78	85.45	1199	77.08	1377	78.66	1467	81.28	79.0067	2340	88.68	2081	87.6	1933	86.93	87.7367	-6.44333	2.28667	8.73	nad3	43134
43135	C<->T	+	GlmaxMp15	nad3	NADH dehydrogenase subunit 3	no	CDS	CCT<->TTT	P<->F	yes	2183	82.82	2790	89.14	3386	86.71	86.2233	1199	78.9	1378	80.12	1469	82.1	80.3733	2339	89.79	2079	88.12	1932	87.6	88.5033	-5.85	2.28	8.13	nad3	43135
43141	C<->T	+	GlmaxMp15	nad3	NADH dehydrogenase subunit 3	no	CDS	CCG<->TTG	P<->L	yes	2406	82.06	2977	88.21	3552	85.05	85.1067	1219	79.1	1387	79.77	1489	82.14	80.3367	2374	89.1	2120	87.18	1990	85.49	87.2567	-4.77	2.15	6.92	nad3	43141
43156	C<->T	+	GlmaxMp15	nad3	NADH dehydrogenase subunit 3	no	CDS	TCC<->TTC	S<->F	yes	2349	81.06	2410	86.98	3000	85.94	84.66	1241	80.05	1393	82.34	1496	86.11	82.8333	2358	92.88	2102	92.34	1969	91.17	92.13	-1.82667	7.47	9.29667	nad3	43156
43173	C<->T	+	GlmaxMp15	nad3	NADH dehydrogenase subunit 3	no	CDS	CCT<->TCT	P<->S	yes	2886	80.34	2681	88.63	3499	85.8	84.9233	1092	73.95	1246	78.83	1349	79.47	77.4167	2089	89.57	1917	88.58	1782	88.27	88.8067	-7.50667	3.88333	11.39	nad3	43173
43177	C<->T	+	GlmaxMp15	nad3	NADH dehydrogenase subunit 3	no	CDS	CCC<->CTC	P<->L	yes	3137	80.88	2828	87.91	3576	85.05	84.6133	1110	75.86	1264	79.13	1370	81.02	78.67	2142	91.66	1936	90.75	1810	90.44	90.95	-5.94333	6.33667	12.28	nad3	43177
43192	C<->T	+	GlmaxMp15	nad3	NADH dehydrogenase subunit 3	no	CDS	CCG<->CTG	P<->L	yes	3564	77.97	3099	86.29	3916	82.46	82.24	1103	73.37	1275	77.54	1407	79.32	76.7433	2219	87.31	2032	86.58	1882	87.53	87.14	-5.49667	4.9	10.3967	nad3	43192
43201	C<->T	+	GlmaxMp15	nad3	NADH dehydrogenase subunit 3	no	CDS	TCT<->TTT	S<->F	yes	3861	84.62	3286	89.9	4136	87.09	87.2033	1136	78.35	1329	80.83	1461	82.9	80.6933	2297	91.08	2093	89.97	1957	90.3	90.45	-6.51	3.24667	9.75667	nad3	43201
43243	C<->T	+	GlmaxMp15	nad3	NADH dehydrogenase subunit 3	no	CDS	TCT<->TTT	S<->F	yes	4102	82.3	3175	87.46	4000	86.42	85.3933	1126	82.55	1273	83.9	1421	87.27	84.5733	2308	93.68	2078	93.46	1950	92.38	93.1733	-0.82	7.78	8.6	nad3	43243
43270	C<->T	+	GlmaxMp15	nad3	NADH dehydrogenase subunit 3	no	CDS	TCG<->TTG	S<->L	yes	4412	88.58	3314	90.59	4242	90.62	89.93	1215	86.6	1351	87.05	1491	89.54	87.73	2417	95.32	2254	95.08	2081	95.1	95.1667	-2.2	5.23667	7.43667	nad3	43270
43275	C<->T	+	GlmaxMp15	nad3	NADH dehydrogenase subunit 3	no	CDS	CGG<->TGG	R<->W	yes	4404	86.54	3265	89.86	4176	89.56	88.6533	1227	86.63	1364	87.34	1511	89.48	87.8167	2472	92.08	2268	91.38	2110	90.36	91.2733	-0.836667	2.62	3.45667	nad3	43275
43402	C<->T	+	GlmaxMp16	rps12	ribosomal protein S12	no	CDS	TCG<->TTG	S<->L	yes	3485	83.82	2539	88.11	3467	88.9	86.9433	1741	83.92	1922	84.4	2106	86.24	84.8533	4044	92.24	3350	92.72	3488	91.09	92.0167	-2.09	5.07333	7.16333	rps12	43402
43431	C<->T	+	GlmaxMp16	rps12	ribosomal protein S12	no	CDS	CGC<->TGC	R<->C	yes	3806	83.53	2804	87.62	3793	88.14	86.43	1692	79.12	1868	79.11	2067	81.23	79.82	4014	92.08	3401	92.6	3404	90.84	91.84	-6.61	5.41	12.02	rps12	43431
43435	C<->T	+	GlmaxMp16	rps12	ribosomal protein S12	no	CDS	CCG<->CTG	P<->L	yes	3825	78.9	2831	85.06	3812	84	82.6533	1662	73	1844	72.55	2031	75.64	73.73	3956	88.44	3345	89.49	3358	86.32	88.0833	-8.92333	5.43	14.3533	rps12	43435
43477	C<->T	+	GlmaxMp16	rps12	ribosomal protein S12	no	CDS	CCA<->CTA	P<->L	yes	3489	85.76	2987	91.86	3977	90.32	89.3133	1740	84.78	2002	84.64	2246	85.9	85.1067	4705	95.46	4021	95.8	3823	94.59	95.2833	-4.20667	5.97	10.1767	rps12	43477
43527	C<->T	+	GlmaxMp16	rps12	ribosomal protein S12	no	CDS	CAC<->TAC	H<->Y	yes	3332	89.86	3048	93.04	4091	92.37	91.7567	1414	89.62	1697	89.69	1939	91.14	90.15	4302	96.89	3777	96.98	3539	96.44	96.77	-1.60667	5.01333	6.62	rps12	43527
43552	C<->T	+	GlmaxMp16	rps12	ribosomal protein S12	no	CDS	TCG<->TTG	S<->L	yes	2833	73.56	2766	82.72	3865	82.23	79.5033	1348	66.3	1572	67.34	1809	69.01	67.55	3978	86.26	3454	88.45	3251	86.21	86.9733	-11.9533	7.47	19.4233	rps12	43552
43615	C<->T	+	GlmaxMp16	rps12	ribosomal protein S12	no	CDS	TCC<->TTC	S<->F	yes	2251	81.12	2077	87.39	2998	87.7	85.4033	1058	81.1	1201	78.39	1397	82.57	80.6867	2921	93.94	2612	94.19	2478	93.59	93.9067	-4.71667	8.50333	13.22	rps12	43615
45542	C<->T	+	GlmaxMp17	atp4	ATPase subunit 4	no	CDS	CCA<->CTA	P<->L	yes	3519	97.07	3605	97.89	5691	97.56	97.5067	2591	95.83	3187	95.74	2596	95.88	95.8167	2452	96.9	2256	96.72	1721	96.98	96.8667	-1.69	-0.64	1.05	atp4	45542
45545	C<->T	+	GlmaxMp17	atp4	ATPase subunit 4	no	CDS	TCT<->TTT	S<->F	yes	4005	93.56	3966	93.92	6170	93.49	93.6567	2657	91.77	3272	92.34	2689	92.19	92.1	2539	95.4	2324	95.28	1780	95.46	95.38	-1.55667	1.72333	3.28	atp4	45545
45575	C<->T	+	GlmaxMp17	atp4	ATPase subunit 4	no	CDS	TCA<->TTA	S<->L	yes	5411	97.73	4924	98.8	6823	98.55	98.36	3771	97.99	4583	97.3	3792	97.58	97.6233	3591	98.44	3287	97.81	2535	97.95	98.0667	-0.736667	-0.293333	0.443333	atp4	45575
45604	C<->T	+	GlmaxMp17	atp4	ATPase subunit 4	no	CDS	CGT<->TGT	R<->C	yes	7350	98.27	6126	98.76	6794	98.28	98.4367	4809	96.93	5825	96.36	4946	96.5	96.5967	4584	98.1	4154	97.5	3276	97.38	97.66	-1.84	-0.776667	1.06333	atp4	45604
45701	C<->T	+	GlmaxMp17	atp4	ATPase subunit 4	no	CDS	TCG<->TTG	S<->L	yes	8190	97.84	6275	98.69	6950	97.9	98.1433	6915	93.95	8009	93.95	6964	94.05	93.9833	6606	96.79	5981	96.01	4768	96.44	96.4133	-4.16	-1.73	2.43	atp4	45701
45713	C<->T	+	GlmaxMp17	atp4	ATPase subunit 4	no	CDS	CCC<->CTC	P<->L	yes	7780	96.49	6028	98.04	7371	97.22	97.25	6828	94.25	7901	93.79	6948	94.19	94.0767	6592	96.41	5986	95.79	4795	96.21	96.1367	-3.17333	-1.11333	2.06	atp4	45713
45734	C<->T	+	GlmaxMp17	atp4	ATPase subunit 4	no	CDS	CCT<->CTT	P<->L	yes	6840	98.41	6134	99.07	8162	98.86	98.78	6879	95.27	8009	95.01	7156	95.6	95.2933	6729	97.34	6193	96.97	4917	97.38	97.23	-3.48667	-1.55	1.93667	atp4	45734
45737	C<->T	+	GlmaxMp17	atp4	ATPase subunit 4	no	CDS	CCG<->TTG	P<->L	yes	6926	98.38	6200	98.9	8190	98.8	98.6933	6915	95.18	8039	94.72	7213	95.18	95.0267	6780	96.76	6222	96.6	4948	96.71	96.69	-3.66667	-2.00333	1.66333	atp4	45737
45792	C<->T	+	GlmaxMp17	atp4	ATPase subunit 4	no	CDS	ACC<->ACT	T<->T	no	8464	51.16	7566	55.14	7944	52.81	53.0367	7673	32.13	8252	33.68	8207	34.8	33.5367	7635	39.17	7007	41.17	5722	41.99	40.7767	-19.5	-12.26	7.24	atp4	45792
45881	C<->T	+	GlmaxMp17	atp4	ATPase subunit 4	no	CDS	TCA<->TTA	S<->L	yes	8197	98.55	7952	99.06	8758	98.32	98.6433	8315	97.42	8649	97.32	8286	97.61	97.45	8418	97.66	8420	97.5	7636	97.74	97.6333	-1.19333	-1.01	0.183333	atp4	45881
45893	C<->T	+	GlmaxMp17	atp4	ATPase subunit 4	no	CDS	CCA<->CTA	P<->L	yes	8702	98.91	8202	98.95	8779	98.29	98.7167	8532	97.1	8826	97.11	8519	97.5	97.2367	8625	98.52	8756	98.28	7895	98.37	98.39	-1.48	-0.326667	1.15333	atp4	45893
45902	C<->T	+	GlmaxMp17	atp4	ATPase subunit 4	no	CDS	ACT<->ATT	T<->I	yes	8695	98.07	8153	98.34	8776	97.47	97.96	8441	94.78	8435	94.31	8391	94.59	94.56	8582	95.31	8602	95.36	7992	95.34	95.3367	-3.4	-2.62333	0.776667	atp4	45902
47254	C<->T	+	GlmaxMp18	rps10	ribosomal protein S10	no	CDS	ACG<->ATG	T<->M	yes	6147	91.48	5997	92.31	6195	90.57	91.4533	5550	84.35	6353	84.28	5995	84.43	84.3533	7441	89.2	6246	90.18	5629	89.99	89.79	-7.1	-1.66333	5.43667	rps10	47254
47268	C<->T	+	GlmaxMp18	rps10	ribosomal protein S10	no	CDS	CGC<->TGC	R<->C	yes	6211	96.72	5671	97.11	5879	95.65	96.4933	5512	94.39	6150	94.58	5843	94.13	94.3667	7692	96.89	6561	97.32	5770	96.8	97.0033	-2.12667	0.51	2.63667	rps10	47268
47450	C<->T	+	GlmaxMp18	rps10	ribosomal protein S10	no	CDS	ATC<->ATT	I<->I	no	1943	19.2	2875	24.1	3601	21.77	21.69	4496	21.73	5020	21.42	4747	22.46	21.87	6696	15.55	5768	17.31	4765	16.97	16.61	0.18	-5.08	-5.26	rps10	47450
47486	C<->T	+	GlmaxMp18	rps10	ribosomal protein S10	no	CDS	TTC<->TTT	F<->F	no	2214	11.02	2237	19.57	3118	18.44	16.3433	4337	9.76	4830	9.72	4502	11.19	10.2233	6376	5.03	5478	5.85	4543	5.76	5.54667	-6.12	-10.7967	-4.67667	rps10	47486
47490	C<->T	+	GlmaxMp18	rps10	ribosomal protein S10	no	CDS	CGG<->TGG	R<->W	yes	2216	90.03	2126	94.78	2875	92.25	92.3533	4248	93.91	4731	93.57	4401	93.31	93.5967	6213	97.14	5337	96.35	4446	96.22	96.57	1.24333	4.21667	2.97333	rps10	47490
47511	C<->T	+	GlmaxMp18	rps10	ribosomal protein S10	no	intronic	NA	NA	NA	1347	52.93	946	64.59	1359	54.16	57.2267	1218	58	1460	58.81	1284	53.66	56.8233	1661	81.25	1405	80.77	1206	78.46	80.16	-0.403333	22.9333	23.3367	rps10	47511
50383	C<->T	+	GlmaxMp18	rps10	ribosomal protein S10	no	CDS	TCG<->TTG	S<->L	yes	7735	89.34	7714	89.78	7585	88.64	89.2533	8133	87.78	8194	86.6	8152	86.63	87.0033	7916	94.76	8252	94.73	8072	94.69	94.7267	-2.25	5.47333	7.72333	rps10	50383
50412	C<->T	+	GlmaxMp18	rps10	ribosomal protein S10	no	CDS	CGA<->TGA	R<->U	yes	8364	94.85	8145	95.14	7956	93.1	94.3633	8543	93.45	8660	94.03	8726	93.56	93.68	9144	97.19	9117	97.15	8897	96.5	96.9467	-0.683333	2.58333	3.26667	rps10	50412
50654	C<->T	+	GlmaxMp19	cox1	cytochrome c oxidase subunit 1	no	CDS	CCG<->CTG	P<->L	yes	8373	90.87	8115	92.7	8142	92.93	92.1667	8555	93.71	8632	93.39	8645	93.64	93.58	8632	97.78	8784	97.93	8667	97.73	97.8133	1.41333	5.64667	4.23333	cox1	50654
50658	C<->T	+	GlmaxMp19	cox1	cytochrome c oxidase subunit 1	no	CDS	GTC<->GTT	V<->V	no	8457	29.54	8137	29.65	8124	29.95	29.7133	8521	22.94	8594	24.15	8639	23.96	23.6833	8850	21.37	8871	20.5	8680	21.15	21.0067	-6.03	-8.70667	-2.67667	cox1	50658
50885	C<->T	+	GlmaxMp19	cox1	cytochrome c oxidase subunit 1	no	CDS	TCT<->TTT	S<->F	yes	7113	99.04	7369	99.4	7602	98.88	99.1067	7486	98.27	7702	98.47	7783	98.34	98.36	8343	98.45	8210	98.5	8036	98.43	98.46	-0.746667	-0.646667	0.1	cox1	50885
50897	C<->T	+	GlmaxMp19	cox1	cytochrome c oxidase subunit 1	no	CDS	TCT<->TTT	S<->F	yes	7373	97.52	7582	98.39	7810	98	97.97	8053	97.48	8229	97.77	8330	97.47	97.5733	8786	98.7	8640	98.71	8432	98.79	98.7333	-0.396667	0.763333	1.16	cox1	50897
51086	C<->T	+	GlmaxMp19	cox1	cytochrome c oxidase subunit 1	no	CDS	TCA<->TTA	S<->L	yes	8109	99.37	8160	98.92	8405	98.91	99.0667	8374	98.64	8210	98.47	8304	98.53	98.5467	8532	99.47	8594	99.34	8210	99.15	99.32	-0.52	0.253333	0.773333	cox1	51086
51095	C<->T	+	GlmaxMp19	cox1	cytochrome c oxidase subunit 1	no	CDS	TCT<->TTT	S<->F	yes	8069	98.64	8095	98.53	8324	98.55	98.5733	8243	98.42	8092	98.39	8165	98.36	98.39	8326	99.44	8395	99.5	8110	99.27	99.4033	-0.183333	0.83	1.01333	cox1	51095
51158	C<->T	+	GlmaxMp19	cox1	cytochrome c oxidase subunit 1	no	CDS	TCC<->TTC	S<->F	yes	7833	98.46	7822	98.62	8089	98.5	98.5267	8111	98.12	8222	98.01	8348	98.11	98.08	8928	99.33	8570	99.34	8303	99.11	99.26	-0.446667	0.733333	1.18	cox1	51158
51194	C<->T	+	GlmaxMp19	cox1	cytochrome c oxidase subunit 1	no	CDS	TCA<->TTA	S<->L	yes	8264	98.13	8165	98.31	8438	98.01	98.15	8275	98.19	8529	98.03	8497	98.11	98.11	8653	99.43	8747	99.3	8557	98.98	99.2367	-0.04	1.08667	1.12667	cox1	51194
51213	C<->T	+	GlmaxMp19	cox1	cytochrome c oxidase subunit 1	no	CDS	TCC<->TCT	S<->S	no	8172	17.19	8129	14.93	8319	13.4	15.1733	7227	6.98	8000	6.66	7497	7.13	6.92333	8307	3.9	8476	3.83	8221	4.01	3.91333	-8.25	-11.26	-3.01	cox1	51213
51218	C<->T	+	GlmaxMp19	cox1	cytochrome c oxidase subunit 1	no	CDS	CCA<->CTA	P<->L	yes	8067	96.67	8073	96.9	8331	96.77	96.78	7323	97.04	8151	96.75	7660	96.78	96.8567	8400	98.57	8585	98.42	8376	98.68	98.5567	0.0766667	1.77667	1.7	cox1	51218
51233	C<->T	+	GlmaxMp19	cox1	cytochrome c oxidase subunit 1	no	CDS	CCA<->CTA	P<->L	yes	7734	97.19	8173	97.8	8396	97.59	97.5267	8245	97.08	8518	96.79	8392	97.03	96.9667	8595	98.71	8686	98.62	8529	98.51	98.6133	-0.56	1.08667	1.64667	cox1	51233
51311	C<->T	+	GlmaxMp19	cox1	cytochrome c oxidase subunit 1	no	CDS	TCT<->TTT	S<->F	yes	8015	98.76	8259	99.04	8403	98.81	98.87	7748	98.58	7506	98.76	7588	98.89	98.7433	8569	99.24	8676	99.36	7708	99.34	99.3133	-0.126667	0.443333	0.57	cox1	51311
51358	C<->T	+	GlmaxMp19	cox1	cytochrome c oxidase subunit 1	no	CDS	CGG<->TGG	R<->W	yes	8152	98.37	8212	98.68	8273	98.14	98.3967	7072	98.35	7799	97.94	7279	98.13	98.14	8061	98.76	8273	98.73	7957	99.03	98.84	-0.256667	0.443333	0.7	cox1	51358
51389	C<->T	+	GlmaxMp19	cox1	cytochrome c oxidase subunit 1	no	CDS	CCC<->CTC	P<->L	yes	8292	98.17	8453	98.57	8505	98.06	98.2667	8696	98.12	8580	97.96	8817	98.21	98.0967	8886	98.92	8862	98.72	8664	99.14	98.9267	-0.17	0.66	0.83	cox1	51389
51404	C<->T	+	GlmaxMp19	cox1	cytochrome c oxidase subunit 1	no	CDS	TCC<->TTC	S<->F	yes	8386	98.24	8505	98.44	8708	98.38	98.3533	8173	98.73	8084	98.62	8262	98.68	98.6767	8672	99.19	8106	99.16	8009	99.49	99.28	0.323333	0.926667	0.603333	cox1	51404
51829	C<->T	+	GlmaxMp19	cox1	cytochrome c oxidase subunit 1	no	CDS	CAC<->TAC	H<->Y	yes	8430	98.47	8194	98.74	8395	98.51	98.5733	7877	97.83	7872	98.06	7914	97.9	97.93	8384	98.64	8232	98.71	7935	98.64	98.6633	-0.643333	0.09	0.733333	cox1	51829
51922	C<->T	+	GlmaxMp19	cox1	cytochrome c oxidase subunit 1	no	CDS	CTC<->TTC	L<->F	yes	8686	96.67	8367	96.58	8428	96.84	96.6967	8616	93.89	8789	92.94	8806	94.61	93.8133	8909	94.31	8997	95.17	8782	95.73	95.07	-2.88333	-1.62667	1.25667	cox1	51922
52045	C<->T	+	GlmaxMp19	cox1	cytochrome c oxidase subunit 1	no	CDS	CGT<->TGT	R<->C	yes	8670	99.2	8718	99.42	8709	99.17	99.2633	8997	99.33	9085	99.3	9049	99.08	99.2367	9328	99.69	9469	99.77	9131	99.74	99.7333	-0.0266667	0.47	0.496667	cox1	52045
52048	C<->T	+	GlmaxMp19	cox1	cytochrome c oxidase subunit 1	no	CDS	CGT<->TGT	R<->C	yes	8673	99.22	8585	99.34	8733	99.08	99.2133	9032	99.15	9111	99.01	9079	98.92	99.0267	9367	99.7	9495	99.69	9175	99.68	99.69	-0.186667	0.476667	0.663333	cox1	52048
52076	C<->T	+	GlmaxMp19	cox1	cytochrome c oxidase subunit 1	no	CDS	TCA<->TTA	S<->L	yes	8963	99.39	8969	99.63	9066	99.42	99.48	8538	99.35	8790	99.26	8864	99.19	99.2667	9273	99.6	9243	99.33	9147	99.42	99.45	-0.213333	-0.03	0.183333	cox1	52076
55250	C<->T	+	GlmaxMp20-2	nad1	NADH dehydrogenase subunit 1	yes	CDS	CCC<->TCC	P<->S	yes	430	56.74	473	68.29	498	55.22	60.0833	465	67.81	535	69.59	522	70.69	69.3633	727	84.22	596	83.08	499	84	83.7667	9.28	23.6833	14.4033	nad1	55250
55252	C<->T	+	GlmaxMp20-2	nad1	NADH dehydrogenase subunit 1	yes	CDS	CCC<->TTT	P<->F	yes	427	24.36	479	29.65	504	22.62	25.5433	465	24.68	538	23.05	526	25	24.2433	727	40.74	596	44.05	499	43.69	42.8267	-1.3	17.2833	18.5833	nad1	55252
55253	C<->T	+	GlmaxMp20-2	nad1	NADH dehydrogenase subunit 1	yes	CDS	CGT<->TGT	R<->C	yes	434	49.77	485	60	513	47.37	52.38	478	64.64	558	65.83	539	65.74	65.4033	750	75.47	607	77.76	508	77.76	76.9967	13.0233	24.6167	11.5933	nad1	55253
55260	C<->T	+	GlmaxMp20-2	nad1	NADH dehydrogenase subunit 1	yes	CDS	TCG<->TTG	S<->L	yes	561	59.36	643	68.9	682	60.85	63.0367	525	63.43	613	67.1	574	64.93	65.1533	819	76.71	661	78.13	578	78.2	77.68	2.11667	14.6433	12.5267	nad1	55260
55296	C<->T	+	GlmaxMp20-2	nad1	NADH dehydrogenase subunit 1	yes	CDS	TCC<->TTC	S<->F	yes	828	83.09	1157	89.02	1174	87.91	86.6733	512	78.12	613	81.57	574	77.57	79.0867	766	87.73	623	84.48	576	85.07	85.76	-7.58667	-0.913333	6.67333	nad1	55296
55297	C<->T	+	GlmaxMp20-2	nad1	NADH dehydrogenase subunit 1	yes	CDS	TCC<->TTT	S<->F	yes	836	62.68	1164	75.09	1188	65.91	67.8933	514	46.3	614	47.73	578	43.77	45.9333	774	59.2	641	58.19	585	64.68	60.69	-21.96	-7.20333	14.7567	nad1	55297
55333	C<->T	+	GlmaxMp20-2	nad1	NADH dehydrogenase subunit 1	yes	CDS	TTC<->TTT	F<->F	no	1002	79.14	1411	83.06	1443	81.64	81.28	537	70.2	633	70.62	563	69.09	69.97	844	79.17	668	80.75	641	80.66	80.1933	-11.31	-1.08667	10.2233	nad1	55333
55340	C<->T	+	GlmaxMp20-2	nad1	NADH dehydrogenase subunit 1	yes	CDS	CGT<->TGT	R<->C	yes	1064	80.83	1456	87.57	1488	85.01	84.47	527	87.31	632	85.31	557	84.74	85.7867	839	94.76	672	93.3	640	92.66	93.5733	1.31667	9.10333	7.78667	nad1	55340
55395	C<->T	+	GlmaxMp20-2	nad1	NADH dehydrogenase subunit 1	yes	CDS	TCA<->TTA	S<->L	yes	1166	62.61	1331	73.18	1463	70.13	68.64	489	55.42	569	59.23	486	62.22	58.9567	719	81.22	552	75.23	560	83.04	79.83	-9.68333	11.19	20.8733	nad1	55395
57396	C<->T	+	GlmaxMp21	ccmFc	cytochrome c biogenesis FC	no	CDS	TCT<->TTT	S<->F	yes	577	86.31	809	90.85	781	87.84	88.3333	384	88.57	440	88.69	424	92.92	90.06	451	95.12	420	93.81	359	89.17	92.7	1.72667	4.36667	2.64	ccmFc	57396
57408	C<->T	+	GlmaxMp21	ccmFc	cytochrome c biogenesis FC	no	CDS	CCT<->CTT	P<->L	yes	578	83.56	800	89	805	85.22	85.9267	363	83.75	438	84.25	419	86.16	84.72	443	94.13	412	92.72	357	86.55	91.1333	-1.20667	5.20667	6.41333	ccmFc	57408
57410	C<->T	+	GlmaxMp21	ccmFc	cytochrome c biogenesis FC	no	CDS	CGT<->TGT	R<->C	yes	577	83.36	805	88.94	802	85.04	85.78	363	83.52	435	84.37	418	87.08	84.99	442	94.58	413	92.05	360	86.94	91.19	-0.79	5.41	6.2	ccmFc	57410
57461	C<->T	+	GlmaxMp21	ccmFc	cytochrome c biogenesis FC	no	CDS	CCC<->TCC	P<->S	yes	599	86.83	783	92.46	786	88.93	89.4067	391	91.56	467	92.08	464	91.4	91.68	501	95.41	436	93.58	399	89	92.6633	2.27333	3.25667	0.983333	ccmFc	57461
57462	C<->T	+	GlmaxMp21	ccmFc	cytochrome c biogenesis FC	no	CDS	CCC<->TTC	P<->F	yes	613	13.54	795	12.58	795	11.68	12.6	391	14.03	471	10.62	468	11.54	12.0633	504	17.86	436	16.02	402	16.63	16.8367	-0.536667	4.23667	4.77333	ccmFc	57462
57480	C<->T	+	GlmaxMp21	ccmFc	cytochrome c biogenesis FC	no	CDS	TCC<->TTC	S<->F	yes	680	83.24	836	88.88	844	85.78	85.9667	310	84.19	379	87.6	360	85.83	85.8733	404	94.55	352	88.92	332	86.45	89.9733	-0.0933333	4.00667	4.1	ccmFc	57480
57509	C<->T	+	GlmaxMp21	ccmFc	cytochrome c biogenesis FC	no	CDS	CCT<->TCT	P<->S	yes	785	83.95	886	87.25	854	84.31	85.17	334	85.03	402	86.85	367	84.05	85.31	428	92.76	361	86.46	346	86.74	88.6533	0.14	3.48333	3.34333	ccmFc	57509
57518	C<->T	+	GlmaxMp21	ccmFc	cytochrome c biogenesis FC	no	CDS	CCT<->TCT	P<->S	yes	882	87.3	965	90.47	975	85.13	87.6333	328	80.55	395	85.82	372	84.68	83.6833	429	93.94	350	89.43	339	87.35	90.24	-3.95	2.60667	6.55667	ccmFc	57518
57663	C<->T	+	GlmaxMp21	ccmFc	cytochrome c biogenesis FC	no	CDS	TCA<->TTA	S<->L	yes	925	86.38	1034	93.42	1033	88.29	89.3633	300	81.67	378	85.75	350	82.91	83.4433	392	96.18	322	90.68	331	88.22	91.6933	-5.92	2.33	8.25	ccmFc	57663
57668	C<->T	+	GlmaxMp21	ccmFc	cytochrome c biogenesis FC	no	CDS	CGT<->TGT	R<->C	yes	965	70.94	1076	81.69	1067	74.6	75.7433	313	73.8	389	72.24	364	71.7	72.58	406	90.89	331	83.38	345	82.9	85.7233	-3.16333	9.98	13.1433	ccmFc	57668
57679	C<->T	+	GlmaxMp21	ccmFc	cytochrome c biogenesis FC	no	CDS	CCC<->TTT	P<->F	yes	1018	67.68	1122	65.78	1145	56.86	63.44	314	31.53	384	38.34	359	39.83	36.5667	425	50.59	336	51.19	349	47.14	49.64	-26.8733	-13.8	13.0733	ccmFc	57679
57692	C<->T	+	GlmaxMp21	ccmFc	cytochrome c biogenesis FC	no	CDS	CTT<->TTT	L<->F	yes	974	86.14	1082	91.4	1056	84.94	87.4933	324	76.92	374	82.13	358	78.89	79.3133	425	92.94	330	88.18	347	86.46	89.1933	-8.18	1.7	9.88	ccmFc	57692
57764	C<->T	+	GlmaxMp21	ccmFc	cytochrome c biogenesis FC	no	CDS	CGT<->TGT	R<->C	yes	1220	87.38	1227	93.15	1219	89.5	90.01	317	87.7	378	86.51	371	86.29	86.8333	470	97.45	357	91.34	353	92.07	93.62	-3.17667	3.61	6.78667	ccmFc	57764
58114	C<->T	+	GlmaxMp21	ccmFc	cytochrome c biogenesis FC	no	CDS	ATC<->ATT	I<->I	no	291	48.11	245	50.61	240	44.17	47.63	140	49.29	152	53.95	135	60	54.4133	161	70.37	129	75.97	132	68.94	71.76	6.78333	24.13	17.3467	ccmFc	58114
61959	C<->T	+	GlmaxMp21	ccmFc	cytochrome c biogenesis FC	no	intronic	NA	NA	NA	992	13.1	552	13.41	963	11.42	12.6433	336	10.71	429	12.82	363	9.37	10.9667	634	20.35	528	19.89	518	20.46	20.2333	-1.67667	7.59	9.26667	ccmFc	61959
62183	C<->T	+	GlmaxMp21	ccmFc	cytochrome c biogenesis FC	no	intronic	NA	NA	NA	1043	72.58	597	70.18	788	69.8	70.8533	251	64.94	386	68.91	317	70.98	68.2767	545	84.04	456	77.07	422	79.15	80.0867	-2.57667	9.23333	11.81	ccmFc	62183
62348	C<->T	+	GlmaxMp21	ccmFc	cytochrome c biogenesis FC	no	CDS	TCT<->TTT	S<->F	yes	2256	89.23	1424	92.35	1515	86.27	89.2833	606	85.83	776	89.05	706	86.14	87.0067	1132	95.06	963	96.37	924	93.72	95.05	-2.27667	5.76667	8.04333	ccmFc	62348
62517	C<->T	+	GlmaxMp21	ccmFc	cytochrome c biogenesis FC	no	CDS	CGC<->CGT	R<->R	no	2017	67.77	1934	69.29	2155	58.38	65.1467	979	52.96	1193	54.02	1189	56.52	54.5	1869	63.6	1579	68.71	1447	63.49	65.2667	-10.6467	0.12	10.7667	ccmFc	62517
62609	C<->T	+	GlmaxMp21	ccmFc	cytochrome c biogenesis FC	no	CDS	CCA<->TTA	P<->L	yes	1520	86.12	1388	82.93	1358	84.9	84.65	1019	74.78	1323	72.86	1282	72.72	73.4533	2002	88.03	1673	89.8	1508	86.48	88.1033	-11.1967	3.45333	14.65	ccmFc	62609
62630	C<->T	+	GlmaxMp21	ccmFc	cytochrome c biogenesis FC	no	CDS	TCG<->TTG	S<->L	yes	1688	88.92	1571	88.16	1541	85.59	87.5567	1080	83.26	1415	83.36	1354	81.55	82.7233	2139	89.73	1827	89.28	1667	89.51	89.5067	-4.83333	1.95	6.78333	ccmFc	62630
62704	C<->T	+	GlmaxMp21	ccmFc	cytochrome c biogenesis FC	no	CDS	CGG<->TGG	R<->W	yes	1264	84.57	1172	81.48	1127	82.52	82.8567	804	69.28	1069	71.43	977	69.84	70.1833	1487	84.83	1374	87.05	1227	86.06	85.98	-12.6733	3.12333	15.7967	ccmFc	62704
62729	C<->T	+	GlmaxMp21	ccmFc	cytochrome c biogenesis FC	no	CDS	TCG<->TTG	S<->L	yes	938	77.61	1027	77.31	989	79.27	78.0633	684	66.37	890	69.7	828	66.18	67.4167	1231	80.68	1154	84.75	1007	82.13	82.52	-10.6467	4.45667	15.1033	ccmFc	62729
62738	C<->T	+	GlmaxMp21	ccmFc	cytochrome c biogenesis FC	no	CDS	TCG<->TTG	S<->L	yes	903	85.71	1009	85.93	980	86.33	85.99	630	76.83	831	78.37	786	75.32	76.84	1163	87.45	1079	87.22	946	87.84	87.5033	-9.15	1.51333	10.6633	ccmFc	62738
62785	C<->T	+	GlmaxMp21	ccmFc	cytochrome c biogenesis FC	no	CDS	CGA<->TGA	R<->U	yes	499	91.18	557	90.84	606	89.93	90.65	477	83.65	582	86.28	490	81.87	83.9333	786	93.9	745	93.83	639	92.98	93.57	-6.71667	2.92	9.63667	ccmFc	62785
63228	C<->T	+	GlmaxMp22	atp6-1	ATPase subunit 6	no	CDS	CCC<->TCC	P<->S	yes	6791	95.38	7594	97.81	7496	96.64	96.61	4324	92.81	5116	91.82	5218	93.07	92.5667	4807	95.84	4536	96.46	4679	96.24	96.18	-4.04333	-0.43	3.61333	atp6-1	63228
63230	C<->T	+	GlmaxMp22	atp6-1	ATPase subunit 6	no	CDS	CCC<->TCT	P<->S	yes	6811	29.35	7606	26.87	7506	26.99	27.7367	4366	18.55	5169	18.72	5259	19.92	19.0633	4836	15.93	4589	16.63	4725	16.67	16.41	-8.67333	-11.3267	-2.65333	atp6-1	63230
63358	C<->T	+	GlmaxMp22	atp6-1	ATPase subunit 6	no	CDS	CCG<->CTG	P<->L	yes	6799	93.34	7867	97.37	7704	95.25	95.32	4893	91.02	6060	90.5	5932	90.58	90.7	5291	94.82	5190	95.09	5191	94.98	94.9633	-4.62	-0.356667	4.26333	atp6-1	63358
63418	C<->T	+	GlmaxMp22	atp6-1	ATPase subunit 6	no	CDS	TCG<->TTG	S<->L	yes	6575	93.39	7608	98.02	7529	96.32	95.91	4981	93.1	6339	91.9	6162	92.48	92.4933	5448	93.23	5145	92.63	5363	92.66	92.84	-3.41667	-3.07	0.346667	atp6-1	63418
63436	C<->T	+	GlmaxMp22	atp6-1	ATPase subunit 6	no	CDS	TCG<->TTG	S<->L	yes	6582	91.05	8583	96.77	7877	94.46	94.0933	4982	92.49	6364	91.26	6194	91.58	91.7767	5445	94.11	4999	93.74	5334	94.34	94.0633	-2.31667	-0.03	2.28667	atp6-1	63436
63451	C<->T	+	GlmaxMp22	atp6-1	ATPase subunit 6	no	CDS	CCC<->CTC	P<->L	yes	6536	90.21	8641	96.63	8531	94.3	93.7133	5167	87.55	6582	86.17	6387	87.02	86.9133	5665	92.91	5182	92.42	5541	93.01	92.78	-6.8	-0.933333	5.86667	atp6-1	63451
63452	C<->T	+	GlmaxMp22	atp6-1	ATPase subunit 6	no	CDS	CCC<->CTT	P<->L	yes	6572	73.45	8653	76.02	8607	72.49	73.9867	5202	63.24	6616	66.94	6430	64.38	64.8533	5692	63.52	5207	66.24	5573	63.77	64.51	-9.13333	-9.47667	-0.343333	atp6-1	63452
63583	C<->T	+	GlmaxMp22	atp6-1	ATPase subunit 6	no	CDS	TCA<->TTA	S<->L	yes	7851	92.93	8041	97.5	7559	94.63	95.02	4850	91.63	6337	90.24	6092	90.42	90.7633	5482	95.48	4990	95.23	5120	95.55	95.42	-4.25667	0.4	4.65667	atp6-1	63583
63642	C<->T	+	GlmaxMp22	atp6-1	ATPase subunit 6	no	CDS	CCT<->TCT	P<->S	yes	6292	92.88	7922	96.67	8063	94.03	94.5267	4148	88.8	5336	88.92	5241	89.02	88.9133	4654	93.95	4324	93.92	4330	94.03	93.9667	-5.61333	-0.56	5.05333	atp6-1	63642
63645	C<->T	+	GlmaxMp22	atp6-1	ATPase subunit 6	no	CDS	CAT<->TAT	H<->Y	yes	6366	91.98	8054	96.06	8139	93.29	93.7767	4138	89.72	5328	89.37	5258	89	89.3633	4650	94.54	4322	94.17	4351	94.67	94.46	-4.41333	0.683333	5.09667	atp6-1	63645
63667	C<->T	+	GlmaxMp22	atp6-1	ATPase subunit 6	no	CDS	TCA<->TTA	S<->L	yes	6240	90.67	8026	95.78	8022	93.51	93.32	3824	93	4969	93.33	4821	91.51	92.6133	4315	94.76	4075	93.53	3953	95.02	94.4367	-0.706667	1.11667	1.82333	atp6-1	63667
63709	C<->T	+	GlmaxMp22	atp6-1	ATPase subunit 6	no	CDS	TCA<->TTA	S<->L	yes	5763	96.69	7720	99.09	7738	97.75	97.8433	4618	94.89	5861	95.45	5753	95.08	95.14	5117	97.44	4970	97.4	4741	97.22	97.3533	-2.70333	-0.49	2.21333	atp6-1	63709
63730	C<->T	+	GlmaxMp22	atp6-1	ATPase subunit 6	no	CDS	TCC<->TTC	S<->F	yes	5469	93	8090	97.34	8011	95.49	95.2767	5110	90.37	6315	91.05	6232	91.38	90.9333	5484	96.12	5374	95.96	5124	95.92	96	-4.34333	0.723333	5.06667	atp6-1	63730
63817	C<->T	+	GlmaxMp22	atp6-1	ATPase subunit 6	no	CDS	CCG<->CTG	P<->L	yes	3437	93.89	5828	97.98	6145	96.24	96.0367	5487	93.64	6437	93.62	6363	94.04	93.7667	5726	96.54	5691	96.56	5545	96.52	96.54	-2.27	0.503333	2.77333	atp6-1	63817
63838	C<->T	+	GlmaxMp22	atp6-1	ATPase subunit 6	no	CDS	TCA<->TTA	S<->L	yes	2621	95.42	4378	98.93	5013	97.51	97.2867	4949	95.66	5519	95.89	5411	96.03	95.86	5105	98.06	5163	98.39	4962	98.03	98.16	-1.42667	0.873333	2.3	atp6-1	63838
63846	C<->T	+	GlmaxMp22	atp6-1	ATPase subunit 6	no	CDS	CAT<->TAT	H<->Y	yes	2490	94.34	4176	98.25	4857	96.25	96.28	4733	95.56	5239	95.08	5163	95.7	95.4467	4929	98.14	4973	97.95	4768	97.9	97.9967	-0.833333	1.71667	2.55	atp6-1	63846
63853	C<->T	+	GlmaxMp22	atp6-1	ATPase subunit 6	no	CDS	TCT<->TTT	S<->F	yes	2381	92.1	3627	97.11	4247	93.69	94.3	4701	93.69	5165	93.5	5098	94	93.73	4907	96.82	4941	96.24	4740	96.42	96.4933	-0.57	2.19333	2.76333	atp6-1	63853
63862	C<->T	+	GlmaxMp22	atp6-1	ATPase subunit 6	no	CDS	TCA<->TTA	S<->L	yes	2230	93.27	3239	97.28	3929	94.73	95.0933	4454	94.53	4711	93.59	4720	94.83	94.3167	4650	98.11	4744	98.04	4499	97.71	97.9533	-0.776667	2.86	3.63667	atp6-1	63862
63900	C<->T	+	GlmaxMp22	atp6-1	ATPase subunit 6	no	CDS	CAA<->TAA	Q<->U	yes	1604	94.45	1922	97.03	1756	95.16	95.5467	3431	94.83	3241	94.15	3341	94.8	94.5933	3671	97.28	3789	97.15	3607	97.34	97.2567	-0.953333	1.71	2.66333	atp6-1	63900
94089	G<->A	-	GlmaxMp28	nad4	NADH dehydrogenase subunit 4	no	CDS	ACC<->ACT	T<->T	no	1650	73.82	1800	87.22	1847	75.2	78.7467	726	53.99	850	53.11	756	50.66	52.5867	874	62.53	639	62.13	723	61.38	62.0133	-26.16	-16.7333	9.42667	nad4	94089
94094	G<->A	-	GlmaxMp28	nad4	NADH dehydrogenase subunit 4	no	CDS	CGG<->TGG	R<->W	yes	1660	76.64	1784	88.57	1859	78.59	81.2667	767	66.75	893	64.13	794	61.26	64.0467	914	75.93	685	74.89	754	71.83	74.2167	-17.22	-7.05	10.17	nad4	94094
94110	G<->A	-	GlmaxMp28	nad4	NADH dehydrogenase subunit 4	no	CDS	TTC<->TTT	F<->F	no	1438	81.64	1499	89.46	1572	79.83	83.6433	763	71.43	899	71.97	803	71.36	71.5867	923	82.23	684	80.26	749	76.64	79.71	-12.0567	-3.93333	8.12333	nad4	94110
94122	G<->A	-	GlmaxMp28	nad4	NADH dehydrogenase subunit 4	no	CDS	TTC<->TTT	F<->F	no	1105	85.25	1005	92.44	1252	89.7	89.13	774	85.03	926	90.53	831	86.88	87.48	945	94.71	717	93.72	771	92.35	93.5933	-1.65	4.46333	6.11333	nad4	94122
94132	G<->A	-	GlmaxMp28	nad4	NADH dehydrogenase subunit 4	no	intronic	NA	NA	NA	775	69.68	559	78.53	862	68.45	72.22	738	85.23	900	88.67	820	84.15	86.0167	909	94.72	691	93.94	733	92.52	93.7267	13.7967	21.5067	7.71	nad4	94132
94669	G<->A	-	GlmaxMp28	nad4	NADH dehydrogenase subunit 4	no	intronic	NA	NA	NA	687	26.64	538	32.16	695	25.18	27.9933	544	29.04	619	28.27	562	30.73	29.3467	643	38.26	415	39.76	500	40.6	39.54	1.35333	11.5467	10.1933	nad4	94669
96182	G<->A	-	GlmaxMp28	nad4	NADH dehydrogenase subunit 4	no	intronic	NA	NA	NA	437	71.85	385	71.95	598	72.24	72.0133	631	78.13	786	80.15	633	80.73	79.67	707	87.69	522	83.33	539	84.79	85.27	7.65667	13.2567	5.6	nad4	96182
96723	G<->A	-	GlmaxMp28	nad4	NADH dehydrogenase subunit 4	no	CDS	TTC<->TTT	F<->F	no	1124	91.37	1576	92.26	1312	89.02	90.8833	839	75.33	976	74	828	75.39	74.9067	979	86.24	790	88.1	788	85.41	86.5833	-15.9767	-4.3	11.6767	nad4	96723
96741	G<->A	-	GlmaxMp28	nad4	NADH dehydrogenase subunit 4	no	CDS	TCC<->TCT	S<->S	no	2629	96.27	3143	97.58	2631	94.49	96.1133	1464	92.7	1652	92.62	1586	92.69	92.67	2043	96.38	1746	96.68	1693	96.46	96.5067	-3.44333	0.393333	3.83667	nad4	96741
96885	G<->A	-	GlmaxMp28	nad4	NADH dehydrogenase subunit 4	no	CDS	CTC<->CTT	L<->L	no	6004	98.85	6534	98.78	6642	98.43	98.6867	4274	96.87	4783	96.68	4816	96.78	96.7767	6307	98.21	5647	97.97	5327	98.18	98.12	-1.91	-0.566667	1.34333	nad4	96885
96890	G<->A	-	GlmaxMp28	nad4	NADH dehydrogenase subunit 4	no	CDS	CAT<->TAT	H<->Y	yes	5578	95.65	6275	95.19	6428	94.94	95.26	4248	91.55	4740	92.22	4766	91.64	91.8033	6233	96.14	5564	96.3	5267	96.74	96.3933	-3.45667	1.13333	4.59	nad4	96890
96891	G<->A	-	GlmaxMp28	nad4	NADH dehydrogenase subunit 4	no	CDS	TCC<->TCT	S<->S	no	5589	98.59	6265	98.58	6419	98.3	98.49	4243	96.87	4726	97.17	4761	96.77	96.9367	6225	98.7	5552	98.74	5265	98.73	98.7233	-1.55333	0.233333	1.78667	nad4	96891
96924	G<->A	-	GlmaxMp28	nad4	NADH dehydrogenase subunit 4	no	CDS	TTC<->TTT	F<->F	no	6093	96.93	6451	97.66	6418	96.74	97.11	4475	94.95	5032	95.08	5030	94.61	94.88	6648	96.72	5921	96.22	5534	96.73	96.5567	-2.23	-0.553333	1.67667	nad4	96924
96945	G<->A	-	GlmaxMp28	nad4	NADH dehydrogenase subunit 4	no	CDS	TTC<->TTT	F<->F	no	6512	97.76	7263	98.14	7257	97.3	97.7333	4103	93.4	4596	93.19	4544	93.32	93.3033	6117	95.57	5408	95.86	4953	95.28	95.57	-4.43	-2.16333	2.26667	nad4	96945
96948	G<->A	-	GlmaxMp28	nad4	NADH dehydrogenase subunit 4	no	CDS	CTC<->CTT	L<->L	no	6548	97.94	7254	98.33	7232	97.57	97.9467	4100	93.59	4602	93.74	4539	93.68	93.67	6119	96.03	5410	96.09	4948	95.7	95.94	-4.27667	-2.00667	2.27	nad4	96948
96954	G<->A	-	GlmaxMp28	nad4	NADH dehydrogenase subunit 4	no	CDS	TTC<->TTT	F<->F	no	6712	96.33	7293	97.76	7321	96.26	96.7833	4116	90.68	4589	91.31	4535	91.58	91.19	6115	94.86	5438	95.55	4946	95.23	95.2133	-5.59333	-1.57	4.02333	nad4	96954
96967	G<->A	-	GlmaxMp28	nad4	NADH dehydrogenase subunit 4	no	CDS	TCT<->TTT	S<->F	yes	6740	98.37	7328	98.85	7354	97.96	98.3933	3934	94.96	4417	94.84	4313	94.6	94.8	5834	96.31	5134	96.64	4685	95.79	96.2467	-3.59333	-2.14667	1.44667	nad4	96967
97063	G<->A	-	GlmaxMp28	nad4	NADH dehydrogenase subunit 4	no	CDS	TCC<->TTC	S<->F	yes	2536	96.69	2387	97.19	2997	97.43	97.1033	1336	95.06	1591	92.33	1555	93.31	93.5667	1952	97.13	1726	96.47	1584	95.09	96.23	-3.53667	-0.873333	2.66333	nad4	97063
97086	G<->A	-	GlmaxMp28	nad4	NADH dehydrogenase subunit 4	no	CDS	ACC<->ACT	T<->T	no	430	59.77	715	82.8	649	74.88	72.4833	893	67.71	1109	69.46	1069	69.32	68.83	1281	76.44	1115	77.26	1073	77.23	76.9767	-3.65333	4.49333	8.14667	nad4	97086
97087	G<->A	-	GlmaxMp28	nad4	NADH dehydrogenase subunit 4	no	CDS	ACC<->ATT	T<->I	yes	422	62.09	713	85.41	646	76.01	74.5033	876	71.64	1111	74.03	1059	72.13	72.6	1271	84.16	1108	84.22	1073	83.43	83.9367	-1.90333	9.43333	11.3367	nad4	97087
97089	G<->A	-	GlmaxMp28	nad4	NADH dehydrogenase subunit 4	no	CDS	TCC<->TCT	S<->S	no	424	62.74	717	87.31	636	79.72	76.59	888	75.84	1105	76.65	1060	74.81	75.7667	1275	87.46	1105	87.53	1071	86.27	87.0867	-0.823333	10.4967	11.32	nad4	97089
97090	G<->A	-	GlmaxMp28	nad4	NADH dehydrogenase subunit 4	no	CDS	TCC<->TTT	S<->F	yes	421	51.54	716	77.65	629	70.05	66.4133	888	58.02	1096	60.2	1058	63.4	60.54	1269	74.39	1105	74.71	1069	74.91	74.67	-5.87333	8.25667	14.13	nad4	97090
99178	G<->A	-	GlmaxMp28	nad4	NADH dehydrogenase subunit 4	no	intronic	NA	NA	NA	823	28.55	386	16.84	762	23.1	22.83	532	14.82	699	13.73	612	14.71	14.42	468	13.89	359	14.48	364	15.11	14.4933	-8.41	-8.33667	0.0733333	nad4	99178
99573	G<->A	-	GlmaxMp28	nad4	NADH dehydrogenase subunit 4	no	intronic	NA	NA	NA	796	6.91	475	8.61	877	6.16	7.22667	491	4.88	633	7.11	491	7.94	6.64333	452	18.98	299	15.38	317	16.09	16.8167	-0.583333	9.59	10.1733	nad4	99573
99715	G<->A	-	GlmaxMp28	nad4	NADH dehydrogenase subunit 4	no	intronic	NA	NA	NA	1513	46.79	697	37.02	1258	42.21	42.0067	534	30.9	591	31.13	532	35.53	32.52	446	43.72	320	37.5	357	51.54	44.2533	-9.48667	2.24667	11.7333	nad4	99715
100490	G<->A	-	GlmaxMp28	nad4	NADH dehydrogenase subunit 4	no	CDS	TCA<->TTA	S<->L	yes	4801	95.69	5120	96.95	5243	96.03	96.2233	2077	95.43	2436	95.94	2371	95.12	95.4967	2691	98.36	2311	98.14	2319	98.45	98.3167	-0.726667	2.09333	2.82	nad4	100490
100529	G<->A	-	GlmaxMp28	nad4	NADH dehydrogenase subunit 4	no	CDS	CCA<->CTA	P<->L	yes	7815	94.68	6410	95.69	6671	93.18	94.5167	3014	91.45	3564	91.02	3551	89.61	90.6933	4298	96.88	3703	96.9	3847	96.96	96.9133	-3.82333	2.39667	6.22	nad4	100529
100530	G<->A	-	GlmaxMp28	nad4	NADH dehydrogenase subunit 4	no	CDS	CCA<->TTA	P<->L	yes	7811	92.77	6406	93.97	6663	90.67	92.47	3080	89.61	3637	90.04	3615	88.36	89.3367	4402	92.72	3791	93.33	3933	93.1	93.05	-3.13333	0.58	3.71333	nad4	100530
100550	G<->A	-	GlmaxMp28	nad4	NADH dehydrogenase subunit 4	no	CDS	TCC<->TTT	S<->F	yes	7862	93.79	6489	95.59	6782	92.98	94.12	3273	92.21	3851	92.01	3827	91.83	92.0167	4685	98.1	4075	97.6	4189	97.97	97.89	-2.10333	3.77	5.87333	nad4	100550
100602	G<->A	-	GlmaxMp28	nad4	NADH dehydrogenase subunit 4	no	CDS	CAC<->TAC	H<->Y	yes	6767	96.29	5688	96.75	6040	94.49	95.8433	3500	91.52	4073	92.44	4205	91.87	91.9433	5212	96.32	4578	96.68	4637	96.74	96.58	-3.9	0.736667	4.63667	nad4	100602
100616	G<->A	-	GlmaxMp28	nad4	NADH dehydrogenase subunit 4	no	CDS	TCA<->TTA	S<->L	yes	7027	97.82	5521	98.03	5723	96.89	97.58	3679	94.65	4388	94.76	4469	94.68	94.6967	5482	97.99	4951	97.54	4856	97.64	97.7233	-2.88333	0.143333	3.02667	nad4	100616
100619	G<->A	-	GlmaxMp28	nad4	NADH dehydrogenase subunit 4	no	CDS	CCT<->CTT	P<->L	yes	7099	97.28	5563	97.72	5733	96.39	97.13	3605	95.06	4270	95.22	4366	94.42	94.9	5307	97.53	4829	97.35	4758	97.52	97.4667	-2.23	0.336667	2.56667	nad4	100619
100727	G<->A	-	GlmaxMp28	nad4	NADH dehydrogenase subunit 4	no	CDS	TCT<->TTT	S<->F	yes	6426	95.77	6813	96.74	6941	95.5	96.0033	3738	94.22	4273	94.43	4283	94.01	94.22	5313	97.56	4679	97.82	4510	97.52	97.6333	-1.78333	1.63	3.41333	nad4	100727
100778	G<->A	-	GlmaxMp28	nad4	NADH dehydrogenase subunit 4	no	CDS	TCA<->TTA	S<->L	yes	4781	95.17	4249	95.65	4791	95.14	95.32	3120	93.05	3637	93.55	3584	93.34	93.3133	4459	97.47	3764	97.43	3703	97.36	97.42	-2.00667	2.1	4.10667	nad4	100778
100812	G<->A	-	GlmaxMp28	nad4	NADH dehydrogenase subunit 4	no	CDS	CTT<->TTT	L<->F	yes	4438	94.03	3409	95.39	3916	95.02	94.8133	2268	94.36	2736	95.11	2714	94.55	94.6733	3311	97.86	2726	97.33	2761	97.36	97.5167	-0.14	2.70333	2.84333	nad4	100812
101113	G<->A	-	GlmaxMp28	nad4	NADH dehydrogenase subunit 4	no	intronic	NA	NA	NA	2040	50.78	1534	44.2	1825	41.37	45.45	947	40.93	1122	43.85	1129	42.21	42.33	1319	39.17	937	41.36	915	44.44	41.6567	-3.12	-3.79333	-0.673333	nad4	101113
102195	G<->A	-	GlmaxMp28	nad4	NADH dehydrogenase subunit 4	no	intronic	NA	NA	NA	2711	39.58	2490	46.63	2915	40.96	42.39	1159	27.96	1421	25.32	1198	28.8	27.36	1318	73.86	909	68.65	920	71.2	71.2367	-15.03	28.8467	43.8767	nad4	102195
102357	G<->A	-	GlmaxMp28	nad4	NADH dehydrogenase subunit 4	no	CDS	TCC<->TCT	S<->S	no	2023	70.44	2622	75.29	3374	75.73	73.82	1821	76.44	2273	77.58	2135	77.66	77.2267	2306	88.43	1838	90.71	1825	89.39	89.51	3.40667	15.69	12.2833	nad4	102357
102358	G<->A	-	GlmaxMp28	nad4	NADH dehydrogenase subunit 4	no	CDS	TCC<->TTT	S<->F	yes	2024	72.78	2628	76.37	3372	77.46	75.5367	1831	77.77	2268	78.05	2127	78.4	78.0733	2303	88.89	1833	90.51	1821	89.96	89.7867	2.53667	14.25	11.7133	nad4	102358
102361	G<->A	-	GlmaxMp28	nad4	NADH dehydrogenase subunit 4	no	CDS	TCT<->TTT	S<->F	yes	2024	69.66	2644	75.43	3389	76.22	73.77	1842	79.23	2291	81.19	2151	80.17	80.1967	2335	88.45	1850	91.73	1839	90.06	90.08	6.42667	16.31	9.88333	nad4	102361
102378	G<->A	-	GlmaxMp28	nad4	NADH dehydrogenase subunit 4	no	CDS	TCC<->TCT	S<->S	no	2169	77.41	2956	81.5	3985	82.46	80.4567	1875	84.53	2322	86.06	2200	82.87	84.4867	2348	91.33	1896	93.58	1889	92.33	92.4133	4.03	11.9567	7.92667	nad4	102378
102391	G<->A	-	GlmaxMp28	nad4	NADH dehydrogenase subunit 4	no	CDS	CCG<->CTG	P<->L	yes	2202	82.47	3213	87.36	4382	87.02	85.6167	2178	89.67	2661	90.57	2497	88.68	89.64	2810	93.21	2220	95.09	2266	92.76	93.6867	4.02333	8.07	4.04667	nad4	102391
102418	G<->A	-	GlmaxMp28	nad4	NADH dehydrogenase subunit 4	no	CDS	TCG<->TTG	S<->L	yes	2299	81.56	4094	85.49	5236	84.76	83.9367	2620	84.41	3242	85.35	3130	85.38	85.0467	3618	92.74	2873	94.82	2997	93.93	93.83	1.11	9.89333	8.78333	nad4	102418
102426	G<->A	-	GlmaxMp28	nad4	NADH dehydrogenase subunit 4	no	CDS	ATC<->ATT	I<->I	no	2277	92.05	4108	93.01	5302	93.49	92.85	2611	91.89	3229	92.05	3109	91.26	91.7333	3607	96.4	2861	97.03	2983	96.62	96.6833	-1.11667	3.83333	4.95	nad4	102426
102432	G<->A	-	GlmaxMp28	nad4	NADH dehydrogenase subunit 4	no	CDS	TAC<->TAT	Y<->Y	no	2290	83.33	4174	87.23	5234	86.87	85.81	2741	85.28	3346	86.42	3222	86.14	85.9467	3737	93.21	2964	94.71	3132	93.65	93.8567	0.136667	8.04667	7.91	nad4	102432
102491	G<->A	-	GlmaxMp28	nad4	NADH dehydrogenase subunit 4	no	CDS	CCC<->TCC	P<->S	yes	2347	57.01	5013	51.59	6448	46.42	51.6733	2683	36.1	3284	39.82	3110	40.86	38.9267	3849	34.28	3142	37.98	3238	34.45	35.57	-12.7467	-16.1033	-3.35667	nad4	102491
102515	G<->A	-	GlmaxMp28	nad4	NADH dehydrogenase subunit 4	no	CDS	CGT<->TGT	R<->C	yes	2659	20.11	6273	18.92	7264	18.49	19.1733	3401	22.19	4122	23.42	4075	24.61	23.4067	4827	16.01	4086	18.47	4162	15.63	16.7033	4.23333	-2.47	-6.70333	nad4	102515
102597	G<->A	-	GlmaxMp28	nad4	NADH dehydrogenase subunit 4	no	CDS	ATC<->ATT	I<->I	no	2359	88.94	5743	92.64	6491	92.5	91.36	3096	92.38	3563	92.14	3457	92.31	92.2767	4175	97.27	3642	96.49	3573	96.25	96.67	0.916667	5.31	4.39333	nad4	102597
102628	G<->A	-	GlmaxMp28	nad4	NADH dehydrogenase subunit 4	no	CDS	TCG<->TTG	S<->L	yes	3864	95.65	6725	96.05	7591	96.46	96.0533	3223	95.78	3717	95.61	3594	95.72	95.7033	4290	97.62	3844	97.04	3727	97.08	97.2467	-0.35	1.19333	1.54333	nad4	102628
102630	G<->A	-	GlmaxMp28	nad4	NADH dehydrogenase subunit 4	no	CDS	TCC<->TCT	S<->S	no	3850	90.94	6726	92.6	7553	92.81	92.1167	3210	92.5	3708	92.4	3597	92.86	92.5867	4282	97.53	3838	96.75	3731	97.08	97.12	0.47	5.00333	4.53333	nad4	102630
102636	G<->A	-	GlmaxMp28	nad4	NADH dehydrogenase subunit 4	no	CDS	CCC<->CCT	P<->P	no	3898	93.95	6788	95.24	7563	95.77	94.9867	3156	95.31	3652	94.72	3543	95.15	95.06	4231	98.72	3783	98.23	3671	97.99	98.3133	0.0733333	3.32667	3.25333	nad4	102636
102638	G<->A	-	GlmaxMp28	nad4	NADH dehydrogenase subunit 4	no	CDS	CCC<->TCT	P<->S	yes	3923	19.91	6794	18.8	7585	15.59	18.1	3185	17.57	3704	17.93	3565	17.67	17.7233	4264	16.9	3829	16.68	3702	17.64	17.0733	-0.376667	-1.02667	-0.65	nad4	102638
102687	G<->A	-	GlmaxMp28	nad4	NADH dehydrogenase subunit 4	no	CDS	ACC<->ACT	T<->T	no	3729	93.03	5600	93.59	7220	94.89	93.8367	2891	93.5	3290	93.47	3280	93.91	93.6267	3953	98.74	3437	97.99	3239	98.33	98.3533	-0.21	4.51667	4.72667	nad4	102687
102717	G<->A	-	GlmaxMp28	nad4	NADH dehydrogenase subunit 4	no	CDS	TCC<->TCT	S<->S	no	4302	87.98	5310	89.06	6974	91.45	89.4967	2777	91.58	3175	91.06	3160	91.87	91.5033	3832	94.31	3350	94.54	3029	94.85	94.5667	2.00667	5.07	3.06333	nad4	102717
102750	G<->A	-	GlmaxMp28	nad4	NADH dehydrogenase subunit 4	no	CDS	TCC<->TCT	S<->S	no	6191	97.56	5563	95.92	7058	96.7	96.7267	3249	95.91	3742	95.65	3701	96.11	95.89	4543	98.37	3791	98.02	3576	97.85	98.08	-0.836667	1.35333	2.19	nad4	102750
102765	G<->A	-	GlmaxMp28	nad4	NADH dehydrogenase subunit 4	no	CDS	TTC<->TTT	F<->F	no	6651	92.62	5727	91.32	6916	92.47	92.1367	3166	91.11	3680	90.34	3627	91.87	91.1067	4453	96.99	3752	96.46	3488	96.99	96.8133	-1.03	4.67667	5.70667	nad4	102765
133228	G<->A	-	GlmaxMp31-1	nad2	NADH dehydrogenase subunit 2	yes	CDS	TCG<->TTG	S<->L	yes	580	76.55	2045	89.88	2129	86.94	84.4567	1053	82.95	1227	82.82	1172	85.18	83.65	1228	92.43	1044	91	1040	89.24	90.89	-0.806667	6.43333	7.24	nad2	133228
133297	G<->A	-	GlmaxMp31-1	nad2	NADH dehydrogenase subunit 2	yes	CDS	CCT<->CTT	P<->L	yes	662	86.56	2955	96.11	3278	94.87	92.5133	2183	94.42	2446	94.04	2338	95.18	94.5467	2378	97.73	2012	97.17	2074	97.16	97.3533	2.03333	4.84	2.80667	nad2	133297
133324	G<->A	-	GlmaxMp31-1	nad2	NADH dehydrogenase subunit 2	yes	CDS	TCA<->TTA	S<->L	yes	602	91.36	2772	97.84	3074	97.1	95.4333	2371	97.22	2720	97.21	2586	97.41	97.28	2587	98.46	2280	97.9	2272	97.76	98.04	1.84667	2.60667	0.76	nad2	133324
133331	G<->A	-	GlmaxMp31-1	nad2	NADH dehydrogenase subunit 2	yes	CDS	CAT<->TAT	H<->Y	yes	590	90.54	2739	97.63	3036	96.41	94.86	2291	96.2	2594	95.41	2506	96.33	95.98	2476	98.26	2178	98.21	2193	97.45	97.9733	1.12	3.11333	1.99333	nad2	133331
133358	G<->A	-	GlmaxMp31-1	nad2	NADH dehydrogenase subunit 2	yes	CDS	CGC<->TGC	R<->C	yes	794	89.55	2834	96.54	3294	93.93	93.34	2718	92.94	3133	92.09	3061	92.78	92.6033	2932	95.51	2593	94.72	2594	94.76	94.9967	-0.736667	1.65667	2.39333	nad2	133358
133364	G<->A	-	GlmaxMp31-1	nad2	NADH dehydrogenase subunit 2	yes	CDS	CCT<->TCT	P<->S	yes	834	94.6	2799	96.65	3211	95.48	95.5767	2751	96.99	3184	96.07	3096	96.84	96.6333	2999	97.23	2622	95.88	2632	95.94	96.35	1.05667	0.773333	-0.283333	nad2	133364
133369	G<->A	-	GlmaxMp31-1	nad2	NADH dehydrogenase subunit 2	yes	CDS	CCA<->CTA	P<->L	yes	842	93.47	2511	97.17	2919	96.3	95.6467	2807	96.58	3240	96.79	3141	96.34	96.57	3087	98.48	2692	98.48	2687	97.69	98.2167	0.923333	2.57	1.64667	nad2	133369
133414	G<->A	-	GlmaxMp31-1	nad2	NADH dehydrogenase subunit 2	yes	CDS	TCC<->TTT	S<->F	yes	875	93.26	2177	96.46	2745	96.07	95.2633	2376	96.56	2782	96.37	2632	96.43	96.4533	2738	98.65	2388	98.28	2281	97.5	98.1433	1.19	2.88	1.69	nad2	133414
133417	G<->A	-	GlmaxMp31-1	nad2	NADH dehydrogenase subunit 2	yes	CDS	TCT<->TTT	S<->F	yes	883	89.13	2177	95.59	2767	94.04	92.92	2366	95.52	2797	93.89	2640	95.08	94.83	2748	97.53	2382	96.89	2287	96.24	96.8867	1.91	3.96667	2.05667	nad2	133417
133422	G<->A	-	GlmaxMp31-1	nad2	NADH dehydrogenase subunit 2	yes	CDS	TTC<->TTT	F<->F	no	974	71.97	2220	72.79	2919	70.13	71.63	2396	60.38	2822	60.47	2671	65.46	62.1033	2734	64.38	2443	63.34	2310	60.48	62.7333	-9.52667	-8.89667	0.63	nad2	133422
133473	G<->A	-	GlmaxMp31-1	nad2	NADH dehydrogenase subunit 2	yes	CDS	TTC<->TTT	F<->F	no	1309	89.84	1788	93.9	2438	93.56	92.4333	1805	91.41	2052	90.55	1986	91.3	91.0867	2160	96.02	1847	95.35	1626	94.03	95.1333	-1.34667	2.7	4.04667	nad2	133473
133502	G<->A	-	GlmaxMp31-1	nad2	NADH dehydrogenase subunit 2	yes	CDS	CTT<->TTT	L<->F	yes	1320	88.04	1414	94.98	2084	92.08	91.7	1348	90.22	1533	87.48	1536	87.83	88.51	1741	95.86	1422	94.37	1151	92.02	94.0833	-3.19	2.38333	5.57333	nad2	133502
133511	G<->A	-	GlmaxMp31-1	nad2	NADH dehydrogenase subunit 2	yes	CDS	CGG<->TGG	R<->W	yes	1324	89.65	1316	94.91	1911	93.88	92.8133	1234	94.49	1377	93.25	1381	92.19	93.31	1631	95.71	1304	95.26	1038	92.97	94.6467	0.496667	1.83333	1.33667	nad2	133511
133632	G<->A	-	GlmaxMp31-1	nad2	NADH dehydrogenase subunit 2	yes	intronic	NA	NA	NA	683	76.13	419	82.58	545	79.82	79.51	442	71.04	544	73.44	531	72.13	72.2033	585	82.59	449	78.67	411	79.56	80.2733	-7.30667	0.763333	8.07	nad2	133632
134914	G<->A	-	GlmaxMp31-1	nad2	NADH dehydrogenase subunit 2	yes	CDS	CCA<->TTA	P<->L	yes	1377	93.75	1367	94.88	1945	94.81	94.48	1169	94.62	1313	94.52	1315	94.37	94.5033	1333	96.25	1131	96.29	1013	96.15	96.23	0.0233333	1.75	1.72667	nad2	134914
134944	G<->A	-	GlmaxMp31-1	nad2	NADH dehydrogenase subunit 2	yes	CDS	CCC<->TCC	P<->S	yes	2135	94.94	1691	95.03	2294	94.2	94.7233	1519	92.9	1702	92.37	1723	92.72	92.6633	1785	96.2	1491	96.52	1377	96.59	96.4367	-2.06	1.71333	3.77333	nad2	134944
145777	C<->T	+	GlmaxMp32	nad4L-1	NADH dehydrogenase subunit 4L	no	CDS	ACG<->ATG	T<->M	yes	3084	82.07	1800	85.94	3388	85.77	84.5933	3031	84.63	3771	84.33	2944	81.73	83.5633	3021	89.57	2741	88.65	2156	88.22	88.8133	-1.03	4.22	5.25	nad4L-1	145777
145783	C<->T	+	GlmaxMp32	nad4L-1	NADH dehydrogenase subunit 4L	no	CDS	CCT<->CTT	P<->L	yes	3242	69.06	1863	71.35	3458	73.11	71.1733	3067	75.26	3834	75.74	2974	72.82	74.6067	3064	78.21	2778	74.55	2195	74.91	75.89	3.43333	4.71667	1.28333	nad4L-1	145783
145816	C<->T	+	GlmaxMp32	nad4L-1	NADH dehydrogenase subunit 4L	no	CDS	TCT<->TTT	S<->F	yes	3937	93.73	2083	93.81	3873	93.34	93.6267	3370	95.64	4134	94.97	3255	92.67	94.4267	3363	96.34	3058	96.27	2378	95.3	95.97	0.8	2.34333	1.54333	nad4L-1	145816
145830	C<->T	+	GlmaxMp32	nad4L-1	NADH dehydrogenase subunit 4L	no	CDS	CGG<->TGG	R<->W	yes	4299	92.67	2253	91.88	4058	92.46	92.3367	3480	92.17	4270	91.13	3383	88.1	90.4667	3420	91.24	3115	89.93	2460	89.64	90.27	-1.87	-2.06667	-0.196667	nad4L-1	145830
145861	C<->T	+	GlmaxMp32	nad4L-1	NADH dehydrogenase subunit 4L	no	CDS	CCT<->CTT	P<->L	yes	4634	95.97	2322	96.13	4128	95.11	95.7367	3514	93.92	4317	93.69	3569	92.53	93.38	3496	96.08	3254	96.87	2504	95.09	96.0133	-2.35667	0.276667	2.63333	nad4L-1	145861
145870	C<->T	+	GlmaxMp32	nad4L-1	NADH dehydrogenase subunit 4L	no	CDS	TCA<->TTA	S<->L	yes	5141	90.59	2548	91.37	4441	91.65	91.2033	3638	91.1	4532	91.18	3746	88.48	90.2533	3698	92.36	3431	91.55	2633	90.32	91.41	-0.95	0.206667	1.15667	nad4L-1	145870
145875	C<->T	+	GlmaxMp32	nad4L-1	NADH dehydrogenase subunit 4L	no	CDS	CCA<->TCA	P<->S	yes	5341	90.32	2663	90.35	4648	90.6	90.4233	3740	91.31	4621	91.68	3835	88.76	90.5833	3789	91.61	3500	91.78	2697	90.4	91.2633	0.16	0.84	0.68	nad4L-1	145875
145885	C<->T	+	GlmaxMp32	nad4L-1	NADH dehydrogenase subunit 4L	no	CDS	TCA<->TTA	S<->L	yes	5491	89.31	2745	91.22	4780	90.48	90.3367	3858	85.59	4782	84.95	3912	83.07	84.5367	3897	91.2	3604	89.4	2747	88.87	89.8233	-5.8	-0.513333	5.28667	nad4L-1	145885
145906	C<->T	+	GlmaxMp32	nad4L-1	NADH dehydrogenase subunit 4L	no	CDS	TCG<->TTG	S<->L	yes	6315	92.1	3241	92.5	5400	91.74	92.1133	3790	92.99	4662	92.43	3817	90.58	92	3807	93.99	3555	93.7	2690	92.16	93.2833	-0.113333	1.17	1.28333	nad4L-1	145906
145925	C<->T	+	GlmaxMp32	nad4L-1	NADH dehydrogenase subunit 4L	no	CDS	TCC<->TCT	S<->S	no	7142	43.79	3682	45.34	5844	42.08	43.7367	4339	26.16	5298	26.57	4365	24.94	25.89	4301	32.33	4020	31.54	3057	30.54	31.47	-17.8467	-12.2667	5.58	nad4L-1	145925
145933	C<->T	+	GlmaxMp32	nad4L-1	NADH dehydrogenase subunit 4L	no	CDS	TCG<->TTG	S<->L	yes	7100	95.17	3659	95.74	5810	94.84	95.25	4386	94.62	5307	93.47	4355	92.27	93.4533	4303	95.4	4050	95.63	3081	94.65	95.2267	-1.79667	-0.0233333	1.77333	nad4L-1	145933
145954	C<->T	+	GlmaxMp32	nad4L-1	NADH dehydrogenase subunit 4L	no	CDS	TCA<->TTA	S<->L	yes	7253	95.19	4184	96.39	6665	95.52	95.7	4721	95.75	5444	95.47	4581	94.29	95.17	4425	95.55	4198	95.48	3256	95.46	95.4967	-0.53	-0.203333	0.326667	nad4L-1	145954
145963	C<->T	+	GlmaxMp32	nad4L-1	NADH dehydrogenase subunit 4L	no	CDS	TCA<->TTA	S<->L	yes	7255	93.37	4460	95.16	7002	93.77	94.1	5053	93.75	5806	93.72	4988	91.59	93.02	4735	94.4	4516	94.49	3537	93.87	94.2533	-1.08	0.153333	1.23333	nad4L-1	145963
145972	C<->T	+	GlmaxMp32	nad4L-1	NADH dehydrogenase subunit 4L	no	CDS	TCA<->TTA	S<->L	yes	7323	91.87	4574	93.84	7108	92.91	92.8733	5106	92.6	5881	92.98	5074	90.25	91.9433	4836	93.68	4595	93.78	3592	92.93	93.4633	-0.93	0.59	1.52	nad4L-1	145972
159356	G<->A	-	GlmaxMp33	nad6	NADH dehydrogenase subunit 6	no	CDS	CCT<->TCT	P<->S	yes	3935	98.37	6668	98.49	5843	98.49	98.45	2579	97.98	2960	97.54	2755	97.82	97.78	3164	99.43	2928	99.39	3042	99.34	99.3867	-0.67	0.936667	1.60667	nad6	159356
159530	G<->A	-	GlmaxMp33	nad6	NADH dehydrogenase subunit 6	no	CDS	CTT<->TTT	L<->F	yes	2395	98.96	6788	99.29	5038	99.09	99.1133	2324	99.18	2566	98.36	2392	98.04	98.5267	2956	99.46	2829	99.12	2559	98.95	99.1767	-0.586667	0.0633333	0.65	nad6	159530
159628	G<->A	-	GlmaxMp33	nad6	NADH dehydrogenase subunit 6	no	CDS	TCA<->TTA	S<->L	yes	1715	96.33	6286	99.33	5393	98.68	98.1133	3002	98.87	3440	98.52	3109	98.84	98.7433	3672	99.18	3562	98.93	3217	98.76	98.9567	0.63	0.843333	0.213333	nad6	159628
159650	G<->A	-	GlmaxMp33	nad6	NADH dehydrogenase subunit 6	no	CDS	CAT<->TAT	H<->Y	yes	2083	96.5	7336	99.29	6599	98.59	98.1267	3379	99.11	3903	98.85	3562	98.85	98.9367	4184	99.31	3945	99.44	3605	99.03	99.26	0.81	1.13333	0.323333	nad6	159650
159658	G<->A	-	GlmaxMp33	nad6	NADH dehydrogenase subunit 6	no	CDS	CCA<->CTA	P<->L	yes	2032	94.93	7207	98.24	6657	97.31	96.8267	3310	97.77	3837	97.99	3495	97.6	97.7867	4107	98.88	3858	99.2	3554	98.57	98.8833	0.96	2.05667	1.09667	nad6	159658
159673	G<->A	-	GlmaxMp33	nad6	NADH dehydrogenase subunit 6	no	CDS	TCC<->TTT	S<->F	yes	2012	91.75	6704	97.35	6615	95.87	94.99	3461	96.8	4014	97.14	3638	96.62	96.8533	4214	98.84	3963	98.94	3659	98.41	98.73	1.86333	3.74	1.87667	nad6	159673
159716	G<->A	-	GlmaxMp33	nad6	NADH dehydrogenase subunit 6	no	CDS	CGC<->TGC	R<->C	yes	4418	96.33	7702	98.56	7522	97.53	97.4733	4520	98.01	5280	98.49	4951	97.98	98.16	5714	97.74	5336	97.73	4912	97.48	97.65	0.686667	0.176667	-0.51	nad6	159716
159724	G<->A	-	GlmaxMp33	nad6	NADH dehydrogenase subunit 6	no	CDS	CCA<->CTA	P<->L	yes	4917	95.34	7882	98.02	7650	96.67	96.6767	4812	96.92	5591	97.5	5277	96.82	97.08	6084	97.54	5646	97.57	5259	97.24	97.45	0.403333	0.773333	0.37	nad6	159724
159730	G<->A	-	GlmaxMp33	nad6	NADH dehydrogenase subunit 6	no	CDS	CCC<->CTT	P<->L	yes	4911	94.93	7545	97.75	7358	96.43	96.37	4877	96.35	5682	97.59	5356	96.6	96.8467	6193	96.71	5743	96.24	5365	96.61	96.52	0.476667	0.15	-0.326667	nad6	159730
159731	G<->A	-	GlmaxMp33	nad6	NADH dehydrogenase subunit 6	no	CDS	CCC<->TTT	P<->F	yes	4907	96.03	7541	98.46	7346	97.24	97.2433	4880	97.48	5682	98.26	5354	97.55	97.7633	6196	98.06	5739	98.03	5366	97.84	97.9767	0.52	0.733333	0.213333	nad6	159731
159766	G<->A	-	GlmaxMp33	nad6	NADH dehydrogenase subunit 6	no	CDS	GCA<->GTA	A<->V	yes	6431	97.65	7744	98.86	7509	97.98	98.1633	4674	98.06	5510	98.37	5205	98.19	98.2067	6021	99.02	5579	99.03	5291	98.83	98.96	0.0433333	0.796667	0.753333	nad6	159766
159793	G<->A	-	GlmaxMp33	nad6	NADH dehydrogenase subunit 6	no	CDS	CCT<->CTT	P<->L	yes	6537	97.45	6796	98.91	6422	98.1	98.1533	4082	98.46	4779	98.56	4627	98.51	98.51	5273	98.48	4911	98.29	4618	98.33	98.3667	0.356667	0.213333	-0.143333	nad6	159793
163172	G<->A	-	GlmaxMp20-1	nad1	NADH dehydrogenase subunit 1	yes	CDS	ACA<->ATA	T<->I	yes	1085	89.68	905	94.81	997	90.17	91.5533	1063	94.64	1161	94.07	1067	94.1	94.27	1169	96.58	891	96.75	895	95.2	96.1767	2.71667	4.62333	1.90667	nad1	163172
163232	G<->A	-	GlmaxMp20-1	nad1	NADH dehydrogenase subunit 1	yes	CDS	TCG<->TTG	S<->L	yes	3544	97.23	3590	97.99	3601	96.95	97.39	1899	95.89	2161	96.76	2052	96.93	96.5267	2432	97.74	2004	98.15	1902	96.95	97.6133	-0.863333	0.223333	1.08667	nad1	163232
163275	G<->A	-	GlmaxMp20-1	nad1	NADH dehydrogenase subunit 1	yes	CDS	CGG<->TGG	R<->W	yes	4176	98.3	4542	98.77	5005	98.2	98.4233	1715	97.55	1985	98.14	1987	98.19	97.96	2360	98.26	2007	99.4	1779	98.37	98.6767	-0.463333	0.253333	0.716667	nad1	163275
163325	G<->A	-	GlmaxMp20-1	nad1	NADH dehydrogenase subunit 1	yes	CDS	TCC<->TTC	S<->F	yes	4504	94.34	4471	95.35	4926	94.05	94.58	1918	92.5	2204	91.35	2212	93.54	92.4633	2619	96.07	2288	96.82	2021	95.9	96.2633	-2.11667	1.68333	3.8	nad1	163325
163500	G<->A	-	GlmaxMp20-1	nad1	NADH dehydrogenase subunit 1	yes	CDS	CTA<->TTA	L<->L	no	3726	33.79	3442	34.31	4050	31.62	33.24	2918	22.73	3256	22.45	3269	26.99	24.0567	3897	23.48	3565	23.73	2987	24.43	23.88	-9.18333	-9.36	-0.176667	nad1	163500
163538	G<->A	-	GlmaxMp20-1	nad1	NADH dehydrogenase subunit 1	yes	CDS	ACG<->ATG	T<->M	yes	4622	95.24	4591	93.23	5138	93.4	93.9567	2902	86.61	3234	87.95	3349	88.93	87.83	3987	91.18	3644	91.53	3062	89.63	90.78	-6.12667	-3.17667	2.95	nad1	163538
164270	G<->A	-	GlmaxMp35	ccmB	cytochrome c biogenesis B	no	CDS	GCG<->GTG	A<->V	yes	3656	93.03	2380	93.11	3262	90.59	92.2433	1425	85.83	1486	88.83	1406	90.26	88.3067	1369	91.17	1105	90.14	931	89.48	90.2633	-3.93667	-1.98	1.95667	ccmB	164270
164290	G<->A	-	GlmaxMp35	ccmB	cytochrome c biogenesis B	no	CDS	TTC<->TTT	F<->F	no	3242	20.33	2157	24.06	3011	21.95	22.1133	1441	16.62	1495	14.1	1387	18.88	16.5333	1351	21.79	1118	23.39	931	20.09	21.7567	-5.58	-0.356667	5.22333	ccmB	164290
164294	G<->A	-	GlmaxMp35	ccmB	cytochrome c biogenesis B	no	CDS	CCG<->CTG	P<->L	yes	3029	91.58	2062	92.24	2862	90.04	91.2867	1404	90.04	1423	90.44	1331	90.62	90.3667	1329	92.26	1085	89.95	920	89.13	90.4467	-0.92	-0.84	0.08	ccmB	164294
164297	G<->A	-	GlmaxMp35	ccmB	cytochrome c biogenesis B	no	CDS	TCT<->TTT	S<->F	yes	3033	96.21	2053	96.49	2871	95.09	95.93	1411	97.17	1435	96.8	1342	97.02	96.9967	1336	98.35	1085	97.05	921	96.74	97.38	1.06667	1.45	0.383333	ccmB	164297
164300	G<->A	-	GlmaxMp35	ccmB	cytochrome c biogenesis B	no	CDS	TCC<->TTC	S<->F	yes	3034	92.44	2054	92.42	2862	91.28	92.0467	1414	91.95	1443	92.17	1347	92.73	92.2833	1342	92.85	1089	92.75	923	92.1	92.5667	0.236667	0.52	0.283333	ccmB	164300
164312	G<->A	-	GlmaxMp35	ccmB	cytochrome c biogenesis B	no	CDS	TCG<->TTG	S<->L	yes	3049	93.02	2108	93.69	2902	91.83	92.8467	1422	93.67	1446	95.09	1332	93.55	94.1033	1332	95.05	1090	94.13	911	94.19	94.4567	1.25667	1.61	0.353333	ccmB	164312
164315	G<->A	-	GlmaxMp35	ccmB	cytochrome c biogenesis B	no	CDS	TCA<->TTA	S<->L	yes	2973	91.86	2038	93.23	2768	90.14	91.7433	1382	91.99	1424	91.51	1282	91.82	91.7733	1297	95.54	1044	94.35	888	93.48	94.4567	0.03	2.71333	2.68333	ccmB	164315
164352	G<->A	-	GlmaxMp35	ccmB	cytochrome c biogenesis B	no	CDS	CGT<->TGT	R<->C	yes	2086	85.05	1729	88.96	2386	85.3	86.4367	1363	80.73	1406	79.32	1305	81.1	80.3833	1294	86.81	1074	83.61	922	81.8	84.0733	-6.05333	-2.36333	3.69	ccmB	164352
164354	G<->A	-	GlmaxMp35	ccmB	cytochrome c biogenesis B	no	CDS	TCT<->TTT	S<->F	yes	2089	86.12	1726	88.18	2385	85.37	86.5567	1359	83.69	1390	83.5	1303	83.74	83.6433	1290	87.29	1069	85.5	911	83.33	85.3733	-2.91333	-1.18333	1.73	ccmB	164354
164363	G<->A	-	GlmaxMp35	ccmB	cytochrome c biogenesis B	no	CDS	CCA<->CTA	P<->L	yes	2507	89	2171	91.85	2787	88.37	89.74	1444	88.03	1435	88.59	1403	86.32	87.6467	1332	87.16	1120	87.41	943	86.96	87.1767	-2.09333	-2.56333	-0.47	ccmB	164363
164372	G<->A	-	GlmaxMp35	ccmB	cytochrome c biogenesis B	no	CDS	TCA<->TTA	S<->L	yes	3481	89.49	2616	90.1	3272	87.35	88.98	1665	86.07	1651	85.84	1688	86.74	86.2167	1555	91.19	1279	89.14	1106	87.8	89.3767	-2.76333	0.396667	3.16	ccmB	164372
164381	G<->A	-	GlmaxMp35	ccmB	cytochrome c biogenesis B	no	CDS	TCA<->TTA	S<->L	yes	3658	88.79	2725	90.39	3358	87.02	88.7333	1658	82.59	1660	83.02	1664	85.71	83.7733	1568	89.24	1272	87.58	1083	86.52	87.78	-4.96	-0.953333	4.00667	ccmB	164381
164390	G<->A	-	GlmaxMp35	ccmB	cytochrome c biogenesis B	no	CDS	CCA<->CTA	P<->L	yes	3766	92.11	2699	93.89	3509	91.42	92.4733	1534	92.25	1535	93.36	1553	93.05	92.8867	1440	95.07	1156	93.08	1013	92.89	93.68	0.413333	1.20667	0.793333	ccmB	164390
164391	G<->A	-	GlmaxMp35	ccmB	cytochrome c biogenesis B	no	CDS	CCA<->TTA	P<->L	yes	3762	92.77	2694	94.51	3506	92.24	93.1733	1534	94.52	1532	95.17	1552	94.53	94.74	1439	96.59	1153	93.93	1013	93.88	94.8	1.56667	1.62667	0.06	ccmB	164391
164399	G<->A	-	GlmaxMp35	ccmB	cytochrome c biogenesis B	no	CDS	TCG<->TTG	S<->L	yes	3941	94.44	2965	95.79	3943	93.41	94.5467	1530	90.46	1533	90.75	1548	92.12	91.11	1419	96.34	1155	93.94	975	93.14	94.4733	-3.43667	-0.0733333	3.36333	ccmB	164399
164442	G<->A	-	GlmaxMp35	ccmB	cytochrome c biogenesis B	no	CDS	CGT<->TGT	R<->C	yes	3640	94.12	2671	96.52	3460	95.06	95.2333	1545	94.5	1464	94.07	1541	94.23	94.2667	1391	97.63	1108	94.49	971	94.95	95.69	-0.966667	0.456667	1.42333	ccmB	164442
164486	G<->A	-	GlmaxMp35	ccmB	cytochrome c biogenesis B	no	CDS	CCA<->CTA	P<->L	yes	3262	69.47	2457	72.73	3238	73.97	72.0567	1596	65.1	1569	66.43	1679	67.04	66.19	1412	66.55	1138	65.94	1022	69.4	67.2967	-5.86667	-4.76	1.10667	ccmB	164486
164487	G<->A	-	GlmaxMp35	ccmB	cytochrome c biogenesis B	no	CDS	CCA<->TTA	P<->L	yes	3262	24.6	2459	27.82	3232	32.2	28.2067	1614	22.99	1581	22	1686	26.47	23.82	1422	27.27	1146	30.92	1037	33.43	30.54	-4.38667	2.33333	6.72	ccmB	164487
164499	G<->A	-	GlmaxMp35	ccmB	cytochrome c biogenesis B	no	CDS	CGG<->TGG	R<->W	yes	3117	91.11	2544	93.32	3366	91.83	92.0867	1584	89.08	1542	90.34	1650	87.88	89.1	1389	95.03	1137	92.44	1026	92.99	93.4867	-2.98667	1.4	4.38667	ccmB	164499
164528	G<->A	-	GlmaxMp35	ccmB	cytochrome c biogenesis B	no	CDS	CCG<->CTG	P<->L	yes	2265	88.26	2092	91.69	2853	90.99	90.3133	1568	92.22	1539	91.56	1650	91.45	91.7433	1413	96.33	1128	93.01	1013	93.4	94.2467	1.43	3.93333	2.50333	ccmB	164528
164529	G<->A	-	GlmaxMp35	ccmB	cytochrome c biogenesis B	no	CDS	CCG<->TTG	P<->L	yes	2271	35.72	2097	35.46	2868	32.81	34.6633	1576	25.55	1548	26.02	1667	26.33	25.9667	1425	26.11	1145	25.04	1014	28.97	26.7067	-8.69667	-7.95667	0.74	ccmB	164529
164580	G<->A	-	GlmaxMp35	ccmB	cytochrome c biogenesis B	no	CDS	CGG<->TGG	R<->W	yes	1670	90.48	1827	90.97	2557	90.3	90.5833	1274	87.05	1247	88.05	1323	88.45	87.85	1166	95.8	937	93.38	780	93.09	94.09	-2.73333	3.50667	6.24	ccmB	164580
164672	G<->A	-	GlmaxMp35	ccmB	cytochrome c biogenesis B	no	CDS	CCT<->CTT	P<->L	yes	847	73.44	1297	82.73	2069	79.6	78.59	964	83.61	1010	83.68	1101	82.83	83.3733	849	85.04	765	79.48	601	86.02	83.5133	4.78333	4.92333	0.14	ccmB	164672
164673	G<->A	-	GlmaxMp35	ccmB	cytochrome c biogenesis B	no	CDS	CCT<->TTT	P<->F	yes	841	71.22	1282	77.15	2066	75.17	74.5133	950	80.48	1000	80.72	1081	79.21	80.1367	847	82.64	757	77.18	599	84.47	81.43	5.62333	6.91667	1.29333	ccmB	164673
164685	G<->A	-	GlmaxMp35	ccmB	cytochrome c biogenesis B	no	CDS	CCC<->TTT	P<->F	yes	927	83.73	1413	86.78	2234	83.53	84.68	1087	86.11	1138	89.29	1166	88.34	87.9133	980	91.33	890	90.67	704	90.23	90.7433	3.23333	6.06333	2.83	ccmB	164685
164687	G<->A	-	GlmaxMp35	ccmB	cytochrome c biogenesis B	no	CDS	CCT<->CTT	P<->L	yes	940	83.95	1421	88.04	2248	85.63	85.8733	1096	87.78	1149	90.34	1194	88.37	88.83	989	92.32	895	91.63	724	90.88	91.61	2.95667	5.73667	2.78	ccmB	164687
164702	G<->A	-	GlmaxMp35	ccmB	cytochrome c biogenesis B	no	CDS	TCG<->TTG	S<->L	yes	929	81.27	1456	85.65	2138	85.5	84.14	1166	84.91	1216	85.54	1275	84.63	85.0267	1044	89.37	961	89.71	751	90.28	89.7867	0.886667	5.64667	4.76	ccmB	164702
164706	G<->A	-	GlmaxMp35	ccmB	cytochrome c biogenesis B	no	CDS	CCT<->TCT	P<->S	yes	899	88.99	1445	90.45	2106	90.52	89.9867	1140	92.83	1197	93.07	1248	91.51	92.47	1026	95.23	948	94.84	747	94.78	94.95	2.48333	4.96333	2.48	ccmB	164706
164707	G<->A	-	GlmaxMp35	ccmB	cytochrome c biogenesis B	no	CDS	ATC<->ATT	I<->I	no	910	14.71	1463	16.27	2150	16.14	15.7067	1149	12.7	1210	13.12	1255	15.3	13.7067	1036	12.83	963	15.35	753	16.87	15.0167	-2	-0.69	1.31	ccmB	164707
164712	G<->A	-	GlmaxMp35	ccmB	cytochrome c biogenesis B	no	CDS	CGG<->TGG	R<->W	yes	912	84.98	1489	88.45	2199	88.86	87.43	1154	88.47	1227	89.89	1242	87.84	88.7333	1050	93.33	986	91.89	753	92.7	92.64	1.30333	5.21	3.90667	ccmB	164712
164717	G<->A	-	GlmaxMp35	ccmB	cytochrome c biogenesis B	no	CDS	CCG<->CTG	P<->L	yes	835	82.63	1403	87.03	2124	87.43	85.6967	1078	87.95	1160	87.93	1170	86.15	87.3433	991	90.21	934	89.61	702	90.31	90.0433	1.64667	4.34667	2.7	ccmB	164717
164718	G<->A	-	GlmaxMp35	ccmB	cytochrome c biogenesis B	no	CDS	CCG<->TTG	P<->L	yes	831	86.16	1403	88.53	2124	89.36	88.0167	1080	89.63	1155	91	1166	88.95	89.86	989	92.32	932	92.06	700	93	92.46	1.84333	4.44333	2.6	ccmB	164718
164729	G<->A	-	GlmaxMp35	ccmB	cytochrome c biogenesis B	no	CDS	TCC<->TTT	S<->F	yes	810	72.38	1388	75.36	2110	75.83	74.5233	1072	63.25	1150	60.61	1176	62.87	62.2433	981	72.88	922	75.7	697	75.75	74.7767	-12.28	0.253333	12.5333	ccmB	164729
164738	G<->A	-	GlmaxMp35	ccmB	cytochrome c biogenesis B	no	CDS	TCA<->TTA	S<->L	yes	767	78.88	1318	86.8	1948	86.24	83.9733	1049	87.8	1106	88.88	1136	87.34	88.0067	929	93.86	887	91.54	659	92.26	92.5533	4.03333	8.58	4.54667	ccmB	164738
164779	G<->A	-	GlmaxMp35	ccmB	cytochrome c biogenesis B	no	CDS	ATC<->ATT	I<->I	no	1273	78.16	1581	76.04	2332	75.9	76.7	1173	73.7	1261	73.93	1352	73.15	73.5933	1091	64.29	1017	66.18	804	65.59	65.3533	-3.10667	-11.3467	-8.24	ccmB	164779
164795	G<->A	-	GlmaxMp35	ccmB	cytochrome c biogenesis B	no	CDS	CCA<->CTA	P<->L	yes	1300	85.54	1565	88.43	2328	88.83	87.6	1202	90.43	1295	89.58	1394	88.67	89.56	1110	91.99	1057	90.63	816	92.52	91.7133	1.96	4.11333	2.15333	ccmB	164795
164823	G<->A	-	GlmaxMp35	ccmB	cytochrome c biogenesis B	no	CDS	CCC<->TCT	P<->S	yes	1300	84.38	1289	84.41	2005	84.79	84.5267	1075	89.86	1181	90.36	1238	87.01	89.0767	1021	86.97	946	88.05	757	89.3	88.1067	4.55	3.58	-0.97	ccmB	164823
170044	C<->T	+	GlmaxMp38	nad7	NADH dehydrogenase subunit 7	no	CDS	TCG<->TTG	S<->L	yes	4005	93.16	3811	89.5	5197	92.5	91.72	2065	91.72	2649	91.4	2619	91.33	91.4833	2053	96.21	1556	96.4	1793	95.6	96.07	-0.236667	4.35	4.58667	nad7	170044
170051	C<->T	+	GlmaxMp38	nad7	NADH dehydrogenase subunit 7	no	CDS	TTC<->TTT	F<->F	no	3945	66.95	3773	56.45	5156	59.61	61.0033	2070	52.9	2644	51.11	2617	51.76	51.9233	2044	36.36	1554	37.07	1793	36.68	36.7033	-9.08	-24.3	-15.22	nad7	170051
170083	C<->T	+	GlmaxMp38	nad7	NADH dehydrogenase subunit 7	no	CDS	TCA<->TTA	S<->L	yes	3153	89.06	3198	85.33	4269	89.93	88.1067	1571	89	2054	88.32	2115	88.33	88.55	1551	93.95	1151	94.97	1342	94.56	94.4933	0.443333	6.38667	5.94333	nad7	170083
170089	C<->T	+	GlmaxMp38	nad7	NADH dehydrogenase subunit 7	no	CDS	TCA<->TTA	S<->L	yes	3108	86.16	3143	81.42	4115	87.59	85.0567	1552	88.32	2054	87.15	2104	86.76	87.41	1544	93.01	1147	93.55	1325	93.59	93.3833	2.35333	8.32667	5.97333	nad7	170089
170105	C<->T	+	GlmaxMp38	nad7	NADH dehydrogenase subunit 7	no	CDS	AAC<->AAT	N<->N	no	2937	19.24	2978	15.41	3849	18.16	17.6033	1535	8.73	2022	9.63	2048	10.69	9.68333	1479	7.43	1127	7.28	1296	6.32	7.01	-7.92	-10.5933	-2.67333	nad7	170105
170143	C<->T	+	GlmaxMp38	nad7	NADH dehydrogenase subunit 7	no	CDS	TCA<->TTA	S<->L	yes	1935	88.32	1740	84.37	1961	88.83	87.1733	771	93.39	1017	89.68	1066	90.36	91.1433	651	93.39	490	93.06	582	92.44	92.9633	3.97	5.79	1.82	nad7	170143
171046	C<->T	+	GlmaxMp38	nad7	NADH dehydrogenase subunit 7	no	intronic	NA	NA	NA	0	0	0	0	0	0	0	578	15.92	742	17.12	689	19.68	17.5733	491	23.48	303	15.13	380	24.21	20.94	17.5733	20.94	3.36667	nad7	171046
171106	C<->T	+	GlmaxMp38	nad7	NADH dehydrogenase subunit 7	no	CDS	TCT<->TTT	S<->F	yes	1114	76.12	1180	76.61	1340	75.37	76.0333	655	82.14	834	84.31	781	82.71	83.0533	660	87.42	459	83.88	469	82.94	84.7467	7.02	8.71333	1.69333	nad7	171106
172181	C<->T	+	GlmaxMp38	nad7	NADH dehydrogenase subunit 7	no	intronic	NA	NA	NA	2245	10.02	2266	6.84	2315	7.17	8.01	1023	6.93	1348	6.66	1204	7.56	7.05	1198	17.82	897	17.91	887	18.69	18.14	-0.96	10.13	11.09	nad7	172181
172441	C<->T	+	GlmaxMp38	nad7	NADH dehydrogenase subunit 7	no	intronic	NA	NA	NA	2937	89.85	2639	86.44	3190	88.44	88.2433	1241	90.25	1705	89.33	1575	90.86	90.1467	1464	95.84	1160	96.04	1136	96.83	96.2367	1.90333	7.99333	6.09	nad7	172441
172461	C<->T	+	GlmaxMp38	nad7	NADH dehydrogenase subunit 7	no	CDS	ACG<->ATG	T<->M	yes	3110	95.4	2891	91.29	3467	93.8	93.4967	1384	94.36	1919	94.06	1760	93.48	93.9667	1648	97.82	1287	97.83	1282	97.9	97.85	0.47	4.35333	3.88333	nad7	172461
172481	C<->T	+	GlmaxMp38	nad7	NADH dehydrogenase subunit 7	no	CDS	CAT<->TAT	H<->Y	yes	4104	92.74	3987	89.62	5054	92.11	91.49	1714	92.02	2294	91.11	2194	91.48	91.5367	2047	97.61	1620	97.9	1605	97.51	97.6733	0.0466667	6.18333	6.13667	nad7	172481
172488	C<->T	+	GlmaxMp38	nad7	NADH dehydrogenase subunit 7	no	CDS	TCA<->TTA	S<->L	yes	4231	89.32	4083	85.7	5204	87.8	87.6067	1739	84.53	2331	84.95	2220	85.27	84.9167	2079	92.84	1636	92.73	1619	93.77	93.1133	-2.69	5.50667	8.19667	nad7	172488
172553	C<->T	+	GlmaxMp38	nad7	NADH dehydrogenase subunit 7	no	CDS	CGT<->TGT	R<->C	yes	6052	94.28	4727	91.6	5922	93.68	93.1867	2328	92.96	2963	91.9	2885	91.83	92.23	2710	97.53	2156	97.22	2090	96.99	97.2467	-0.956667	4.06	5.01667	nad7	172553
172572	C<->T	+	GlmaxMp38	nad7	NADH dehydrogenase subunit 7	no	CDS	TCA<->TTA	S<->L	yes	6562	95.52	5519	93.1	6257	93.13	93.9167	2535	94.8	3222	92.99	3112	93.83	93.8733	2949	98.1	2345	97.53	2276	98.11	97.9133	-0.0433333	3.99667	4.04	nad7	172572
172620	C<->T	+	GlmaxMp38	nad7	NADH dehydrogenase subunit 7	no	CDS	TCA<->TTA	S<->L	yes	6856	97.21	5620	95.06	6083	95.66	95.9767	2738	96.35	3369	95.43	3385	95.24	95.6733	3185	97.9	2556	98	2445	97.87	97.9233	-0.303333	1.94667	2.25	nad7	172620
172629	C<->T	+	GlmaxMp38	nad7	NADH dehydrogenase subunit 7	no	CDS	TCC<->TTC	S<->F	yes	7166	96.82	5832	93.69	6338	94.26	94.9233	2768	95.52	3410	94.61	3435	94.89	95.0067	3243	98.37	2604	97.7	2497	98.32	98.13	0.0833333	3.20667	3.12333	nad7	172629
172669	C<->T	+	GlmaxMp38	nad7	NADH dehydrogenase subunit 7	no	CDS	TTC<->TTT	F<->F	no	7867	2.11	6174	2.61	6998	2.44	2.38667	4562	3.66	5477	3.58	5426	4.68	3.97333	5031	20.27	4047	21.26	3911	22.24	21.2567	1.58667	18.87	17.2833	nad7	172669
172815	C<->T	+	GlmaxMp38	nad7	NADH dehydrogenase subunit 7	no	CDS	TCA<->TTA	S<->L	yes	5914	96.35	5490	96.54	5635	96.13	96.34	3892	94.97	4647	95.46	4611	94.97	95.1333	4144	97.88	3408	97.66	3280	97.53	97.69	-1.20667	1.35	2.55667	nad7	172815
173990	C<->T	+	GlmaxMp38	nad7	NADH dehydrogenase subunit 7	no	CDS	TCG<->TTG	S<->L	yes	4637	92.17	3091	90.56	3835	90.9	91.21	1563	92.78	1941	91.4	1838	91.78	91.9867	1534	94.73	1159	93.8	1212	93.9	94.1433	0.776667	2.93333	2.15667	nad7	173990
174016	C<->T	+	GlmaxMp38	nad7	NADH dehydrogenase subunit 7	no	CDS	CAT<->TAT	H<->Y	yes	4912	96.05	3356	95.56	4081	95.57	95.7267	1830	95.79	2289	95.63	2178	95.78	95.7333	1850	97.41	1408	96.38	1458	97.53	97.1067	0.00666667	1.38	1.37333	nad7	174016
174026	C<->T	+	GlmaxMp38	nad7	NADH dehydrogenase subunit 7	no	CDS	TCG<->TTG	S<->L	yes	4975	92.91	3520	89.35	4225	88.05	90.1033	1858	88.5	2342	88.99	2236	88.6	88.6967	1909	95.34	1447	94.34	1521	94.82	94.8333	-1.40667	4.73	6.13667	nad7	174026
174031	C<->T	+	GlmaxMp38	nad7	NADH dehydrogenase subunit 7	no	CDS	CCT<->TCT	P<->S	yes	5076	95.09	3676	92.85	4375	91.41	93.1167	1913	88.23	2357	88.31	2281	87.61	88.05	1922	94.39	1466	93.73	1554	94.6	94.24	-5.06667	1.12333	6.19	nad7	174031
174032	C<->T	+	GlmaxMp38	nad7	NADH dehydrogenase subunit 7	no	CDS	CCT<->TTT	P<->F	yes	5094	95.56	3684	93.38	4388	92.5	93.8133	1925	89.92	2372	89.97	2281	89.35	89.7467	1927	95.9	1465	94.48	1552	95.81	95.3967	-4.06667	1.58333	5.65	nad7	174032
174061	C<->T	+	GlmaxMp38	nad7	NADH dehydrogenase subunit 7	no	CDS	CGC<->TGC	R<->C	yes	5293	93.16	4107	91.45	4965	90.11	91.5733	2021	87.29	2473	85.66	2396	86.7	86.55	2005	94.63	1524	94.03	1643	95.44	94.7	-5.02333	3.12667	8.15	nad7	174061
174081	C<->T	+	GlmaxMp38	nad7	NADH dehydrogenase subunit 7	no	CDS	ATC<->ATT	I<->I	no	5392	17.45	4570	12.95	5388	15.81	15.4033	2067	7.83	2503	7.54	2424	8.65	8.00667	2040	13.33	1537	11.38	1661	13.78	12.83	-7.39667	-2.57333	4.82333	nad7	174081
174128	C<->T	+	GlmaxMp38	nad7	NADH dehydrogenase subunit 7	no	CDS	CCT<->CTT	P<->L	yes	3932	94.56	3974	92.07	4267	91.82	92.8167	1977	93.53	2373	92.59	2302	94.05	93.39	1967	97.82	1471	97.62	1562	97.64	97.6933	0.573333	4.87667	4.30333	nad7	174128
176117	C<->T	+	GlmaxMp38	nad7	NADH dehydrogenase subunit 7	no	intronic	NA	NA	NA	1971	81.33	2191	87.31	2226	82.8	83.8133	1254	81.99	1491	82.33	1461	82.92	82.4133	1213	78.85	963	76.6	1074	72.7	76.05	-1.4	-7.76333	-6.36333	nad7	176117
176288	C<->T	+	GlmaxMp38	nad7	NADH dehydrogenase subunit 7	no	CDS	TCC<->TCT	S<->S	no	3767	54.21	4757	55.58	4458	50.34	53.3767	2541	30.95	3037	30.69	3141	31.16	30.9333	3397	37.36	2916	38.33	2759	34.14	36.61	-22.4433	-16.7667	5.67667	nad7	176288
176298	C<->T	+	GlmaxMp38	nad7	NADH dehydrogenase subunit 7	no	CDS	CCT<->TCT	P<->S	yes	3870	61.9	4994	66.06	4676	61.09	63.0167	2673	53.12	3174	55.26	3293	56.44	54.94	3535	53.91	3077	53.73	2891	54.18	53.94	-8.07667	-9.07667	-1	nad7	176298
176375	C<->T	+	GlmaxMp38	nad7	NADH dehydrogenase subunit 7	no	CDS	CCC<->CCT	P<->P	no	5098	28.29	6209	32.87	5853	29.55	30.2367	3011	18.2	3728	20.14	3802	21	19.78	4014	21.39	3521	21.95	3324	22.62	21.9867	-10.4567	-8.25	2.20667	nad7	176375
176382	C<->T	+	GlmaxMp38	nad7	NADH dehydrogenase subunit 7	no	CDS	CGT<->TGT	R<->C	yes	5067	88.47	6157	90.95	5739	89.62	89.68	2887	82.16	3621	82.06	3686	83.03	82.4167	3866	85.6	3405	86.67	3173	86.32	86.1967	-7.26333	-3.48333	3.78	nad7	176382
176404	C<->T	+	GlmaxMp38	nad7	NADH dehydrogenase subunit 7	no	CDS	TCT<->TTT	S<->F	yes	5624	89.76	6509	92.47	6161	88.38	90.2033	2955	81.86	3722	82.68	3711	82.91	82.4833	3730	86.46	3245	86.56	3205	85.96	86.3267	-7.72	-3.87667	3.84333	nad7	176404
176413	C<->T	+	GlmaxMp38	nad7	NADH dehydrogenase subunit 7	no	CDS	TCA<->TTA	S<->L	yes	5724	85.17	6245	87.4	6139	84.2	85.59	2886	71.7	3630	75.72	3663	74.22	73.88	3642	80.52	3203	80.31	3116	80.72	80.5167	-11.71	-5.07333	6.63667	nad7	176413
176428	C<->T	+	GlmaxMp38	nad7	NADH dehydrogenase subunit 7	no	CDS	TCT<->TTT	S<->F	yes	5936	86.34	6373	88.77	6278	83.91	86.34	2823	77.42	3537	78.84	3588	77.46	77.9067	3522	84.37	3086	84.36	3032	83.91	84.2133	-8.43333	-2.12667	6.30667	nad7	176428
176449	C<->T	+	GlmaxMp38	nad7	NADH dehydrogenase subunit 7	no	CDS	CCA<->CTA	P<->L	yes	5838	82.96	5642	86.8	5846	82.62	84.1267	2852	74.92	3530	75.67	3515	74.31	74.9667	3516	79.75	3095	77.73	2987	81.76	79.7467	-9.16	-4.38	4.78	nad7	176449
176462	C<->T	+	GlmaxMp38	nad7	NADH dehydrogenase subunit 7	no	CDS	GTC<->GTT	V<->V	no	5429	17.19	4985	18.27	5333	15.6	17.02	2683	5.59	3258	6.59	3183	5.9	6.02667	3217	3.64	2848	3.47	2735	4.57	3.89333	-10.9933	-13.1267	-2.13333	nad7	176462
176491	C<->T	+	GlmaxMp38	nad7	NADH dehydrogenase subunit 7	no	CDS	TCT<->TTT	S<->F	yes	4987	85.88	4108	87.59	4515	82.62	85.3633	2408	77.3	2950	78.5	2845	79.07	78.29	2880	83.39	2539	83.67	2505	83.49	83.5167	-7.07333	-1.84667	5.22667	nad7	176491
176843	C<->T	+	GlmaxMp39	atp1-1	ATPase subunit 1	no	CDS	ACC<->ACT	T<->T	no	4581	36.8	4557	38.52	6075	37.11	37.4767	3782	21.68	4123	19.99	3941	21.06	20.91	4396	16.39	3952	15.42	3530	17.54	16.45	-16.5667	-21.0267	-4.46	atp1-1	176843
177626	C<->T	+	GlmaxMp39	atp1-1	ATPase subunit 1	no	CDS	ACC<->ACT	T<->T	no	2297	58.42	2601	56.26	3032	52.41	55.6967	1777	31.3	2150	28	2123	29.48	29.5933	2652	29.74	2043	29.63	2040	33.37	30.9133	-26.1033	-24.7833	1.32	atp1-1	177626
205992	G<->A	-	GlmaxMp46	nad4L-2	NADH dehydrogenase subunit 4L	no	CDS	TCA<->TTA	S<->L	yes	6471	92.09	4773	93.55	6787	93.67	93.1033	4976	92.75	5883	93.39	4974	90.75	92.2967	4686	93.41	4778	93.51	3542	93.23	93.3833	-0.806667	0.28	1.08667	nad4L-2	205992
206001	G<->A	-	GlmaxMp46	nad4L-2	NADH dehydrogenase subunit 4L	no	CDS	TCA<->TTA	S<->L	yes	6431	93.59	4667	94.54	6700	94.36	94.1633	4930	93.72	5813	94.31	4903	92.38	93.47	4603	94.29	4681	94.11	3505	94.15	94.1833	-0.693333	0.02	0.713333	nad4L-2	206001
206010	G<->A	-	GlmaxMp46	nad4L-2	NADH dehydrogenase subunit 4L	no	CDS	TCA<->TTA	S<->L	yes	6062	95.04	4295	96.14	6367	96.06	95.7467	4589	95.76	5432	95.95	4543	94.39	95.3667	4294	95.6	4367	94.9	3220	95.56	95.3533	-0.38	-0.393333	-0.0133333	nad4L-2	206010
206031	G<->A	-	GlmaxMp46	nad4L-2	NADH dehydrogenase subunit 4L	no	CDS	TCG<->TTG	S<->L	yes	5033	95.09	3763	95.01	5495	95.51	95.2033	4261	93.76	5178	93.51	4292	92.18	93.15	4310	95.25	4226	95.18	3050	94.79	95.0733	-2.05333	-0.13	1.92333	nad4L-2	206031
206039	G<->A	-	GlmaxMp46	nad4L-2	NADH dehydrogenase subunit 4L	no	CDS	TCC<->TCT	S<->S	no	5106	43.27	3720	44.8	5661	43.25	43.7733	4234	25.17	5146	26.04	4269	24.59	25.2667	4313	30.69	4214	30.75	2994	29.98	30.4733	-18.5067	-13.3	5.20667	nad4L-2	206039
206058	G<->A	-	GlmaxMp46	nad4L-2	NADH dehydrogenase subunit 4L	no	CDS	TCG<->TTG	S<->L	yes	4732	91.53	3288	92.61	5302	92.42	92.1867	3662	92.12	4484	92.74	3751	89.76	91.54	3876	94.04	3708	93.7	2628	92.63	93.4567	-0.646667	1.27	1.91667	nad4L-2	206058
206079	G<->A	-	GlmaxMp46	nad4L-2	NADH dehydrogenase subunit 4L	no	CDS	TCA<->TTA	S<->L	yes	4985	90.43	2779	90.86	4679	90.96	90.75	3716	85.74	4625	85.82	3783	82.16	84.5733	3958	91.01	3728	89.91	2716	89.33	90.0833	-6.17667	-0.666667	5.51	nad4L-2	206079
206089	G<->A	-	GlmaxMp46	nad4L-2	NADH dehydrogenase subunit 4L	no	CDS	CCA<->TCA	P<->S	yes	5030	91.37	2702	89.97	4531	90.86	90.7333	3583	91.3	4489	91.14	3722	88.45	90.2967	3844	91.79	3595	92.1	2646	90.82	91.57	-0.436667	0.836667	1.27333	nad4L-2	206089
206094	G<->A	-	GlmaxMp46	nad4L-2	NADH dehydrogenase subunit 4L	no	CDS	TCA<->TTA	S<->L	yes	4968	91.51	2541	91.03	4365	92.21	91.5833	3537	91.04	4395	90.65	3670	88.26	89.9833	3779	91.67	3549	91.46	2610	91.12	91.4167	-1.6	-0.166667	1.43333	nad4L-2	206094
206103	G<->A	-	GlmaxMp46	nad4L-2	NADH dehydrogenase subunit 4L	no	CDS	CCT<->CTT	P<->L	yes	4728	96.36	2328	96.61	4079	95.98	96.3167	3395	93.82	4197	93.4	3497	92.17	93.13	3540	95.91	3373	96.72	2439	95.69	96.1067	-3.18667	-0.21	2.97667	nad4L-2	206103
206134	G<->A	-	GlmaxMp46	nad4L-2	NADH dehydrogenase subunit 4L	no	CDS	CGG<->TGG	R<->W	yes	4285	93.07	2199	92.77	4100	93	92.9467	3418	91.55	4199	90.79	3415	88.94	90.4267	3491	90.41	3190	91.2	2383	88.8	90.1367	-2.52	-2.81	-0.29	nad4L-2	206134
206148	G<->A	-	GlmaxMp46	nad4L-2	NADH dehydrogenase subunit 4L	no	CDS	TCT<->TTT	S<->F	yes	3906	93.63	2045	94.33	3923	94.49	94.15	3295	94.88	4041	94.05	3261	93.11	94.0133	3422	95.77	3115	96.28	2338	95.43	95.8267	-0.136667	1.67667	1.81333	nad4L-2	206148
206181	G<->A	-	GlmaxMp46	nad4L-2	NADH dehydrogenase subunit 4L	no	CDS	CCT<->CTT	P<->L	yes	3274	67.69	1830	71.64	3506	73.77	71.0333	2955	76.93	3736	74.48	2994	71.32	74.2433	3131	74.75	2807	75.49	2118	74.75	74.9967	3.21	3.96333	0.753333	nad4L-2	206181
206187	G<->A	-	GlmaxMp46	nad4L-2	NADH dehydrogenase subunit 4L	no	CDS	ACG<->ATG	T<->M	yes	3145	82.67	1765	85.44	3387	85.62	84.5767	2898	86.69	3665	83.71	2936	81.23	83.8767	3069	87.72	2751	89.2	2077	86.23	87.7167	-0.7	3.14	3.84	nad4L-2	206187
244724	G<->A	-	GlmaxMp51	ccmFn	cytochrome c biogenesis FN	no	CDS	TCA<->TTA	S<->L	yes	542	88.75	702	93.3	684	91.23	91.0933	298	87.58	347	89.05	361	88.37	88.3333	218	93.58	167	92.22	150	84	89.9333	-2.76	-1.16	1.6	ccmFn	244724
244736	G<->A	-	GlmaxMp51	ccmFn	cytochrome c biogenesis FN	no	CDS	CCA<->CTA	P<->L	yes	544	94.12	707	95.19	676	95.86	95.0567	288	92.71	343	93.29	353	94.05	93.35	215	96.28	172	95.95	152	87.5	93.2433	-1.70667	-1.81333	-0.106667	ccmFn	244736
244740	G<->A	-	GlmaxMp51	ccmFn	cytochrome c biogenesis FN	no	CDS	CTT<->TTT	L<->F	yes	532	83.65	698	88.83	654	87.77	86.75	286	84.27	340	85	349	84.86	84.71	219	93.61	175	91.43	151	81.46	88.8333	-2.04	2.08333	4.12333	ccmFn	244740
244760	G<->A	-	GlmaxMp51	ccmFn	cytochrome c biogenesis FN	no	CDS	TCG<->TTG	S<->L	yes	585	89.44	736	94.84	678	92.04	92.1067	310	88.39	360	89.44	372	86.56	88.13	220	92.27	184	88.59	154	82.47	87.7767	-3.97667	-4.33	-0.353333	ccmFn	244760
244779	G<->A	-	GlmaxMp51	ccmFn	cytochrome c biogenesis FN	no	CDS	CTT<->TTT	L<->F	yes	584	90.92	717	93.17	651	90.78	91.6233	308	83.44	361	85.08	374	81.82	83.4467	218	82.57	182	82.42	165	73.94	79.6433	-8.17667	-11.98	-3.80333	ccmFn	244779
244803	G<->A	-	GlmaxMp51	ccmFn	cytochrome c biogenesis FN	no	CDS	CGT<->TGT	R<->C	yes	617	88.98	724	92.27	655	92.37	91.2067	352	90.93	437	90.62	424	88.94	90.1633	254	91.37	218	90.87	200	87.06	89.7667	-1.04333	-1.44	-0.396667	ccmFn	244803
244854	G<->A	-	GlmaxMp51	ccmFn	cytochrome c biogenesis FN	no	CDS	CGG<->TGG	R<->W	yes	581	89.33	629	91.57	549	91.44	90.78	353	89.8	448	87.53	392	86.99	88.1067	266	91.73	229	91.27	208	87.02	90.0067	-2.67333	-0.773333	1.9	ccmFn	244854
244872	G<->A	-	GlmaxMp51	ccmFn	cytochrome c biogenesis FN	no	CDS	CGG<->TGG	R<->W	yes	611	89.03	613	92.33	578	91.35	90.9033	337	91.39	421	89.13	385	89.35	89.9567	255	92.16	230	92.61	207	88.41	91.06	-0.946667	0.156667	1.10333	ccmFn	244872
244887	G<->A	-	GlmaxMp51	ccmFn	cytochrome c biogenesis FN	no	CDS	CAT<->TAT	H<->Y	yes	593	90.56	619	93.54	595	94.96	93.02	323	93.19	410	90	375	91.47	91.5533	243	93.42	225	90.67	205	89.27	91.12	-1.46667	-1.9	-0.433333	ccmFn	244887
244904	G<->A	-	GlmaxMp51	ccmFn	cytochrome c biogenesis FN	no	CDS	CCA<->CTA	P<->L	yes	914	91.58	880	96.02	876	95.32	94.3067	343	93	432	91.45	398	93.97	92.8067	252	94.47	221	91.4	222	89.64	91.8367	-1.5	-2.47	-0.97	ccmFn	244904
244932	G<->A	-	GlmaxMp51	ccmFn	cytochrome c biogenesis FN	no	CDS	CGG<->TGG	R<->W	yes	995	92.96	1034	94.78	976	94.67	94.1367	353	90.37	433	88.22	407	92.38	90.3233	250	93.2	228	90.83	235	88.94	90.99	-3.81333	-3.14667	0.666667	ccmFn	244932
245250	G<->A	-	GlmaxMp51	ccmFn	cytochrome c biogenesis FN	no	CDS	CGC<->TGC	R<->C	yes	1259	94.05	1488	95.5	1403	93.87	94.4733	398	86.97	484	88.84	495	90.51	88.7733	319	95.62	241	94.19	242	90.08	93.2967	-5.7	-1.17667	4.52333	ccmFn	245250
245399	G<->A	-	GlmaxMp51	ccmFn	cytochrome c biogenesis FN	no	CDS	TCA<->TTA	S<->L	yes	812	94.21	1216	94.98	1148	93.47	94.22	443	89.41	522	91.95	560	91.25	90.87	379	96.05	254	95.28	273	90.91	94.08	-3.35	-0.14	3.21	ccmFn	245399
245414	G<->A	-	GlmaxMp51	ccmFn	cytochrome c biogenesis FN	no	CDS	CCA<->CTA	P<->L	yes	806	89.33	1150	91.91	1118	90.97	90.7367	445	86.29	534	86.89	569	83.16	85.4467	386	94.04	260	93.85	274	87.27	91.72	-5.29	0.983333	6.27333	ccmFn	245414
245426	G<->A	-	GlmaxMp51	ccmFn	cytochrome c biogenesis FN	no	CDS	TCA<->TTA	S<->L	yes	857	90.2	1350	92	1233	92.54	91.58	429	91.16	530	91.51	553	89.33	90.6667	374	95.2	255	92.16	266	87.97	91.7767	-0.913333	0.196667	1.11	ccmFn	245426
245448	G<->A	-	GlmaxMp51	ccmFn	cytochrome c biogenesis FN	no	CDS	CGT<->TGT	R<->C	yes	857	94.75	1317	94.68	1120	93.93	94.4533	428	90.42	521	91.55	537	89.57	90.5133	368	94.02	254	90.98	267	88.01	91.0033	-3.94	-3.45	0.49	ccmFn	245448
245476	G<->A	-	GlmaxMp51	ccmFn	cytochrome c biogenesis FN	no	CDS	TCC<->TCT	S<->S	no	870	37.36	1380	36.38	1174	36.2	36.6467	392	18.37	484	17.25	528	19.7	18.44	326	15.34	256	12.11	243	13.17	13.54	-18.2067	-23.1067	-4.9	ccmFn	245476
245486	G<->A	-	GlmaxMp51	ccmFn	cytochrome c biogenesis FN	no	CDS	TCA<->TTA	S<->L	yes	895	91.06	1382	93.13	1197	89.81	91.3333	403	85.36	481	88.17	516	84.69	86.0733	293	93.52	252	88.89	238	84.45	88.9533	-5.26	-2.38	2.88	ccmFn	245486
245495	G<->A	-	GlmaxMp51	ccmFn	cytochrome c biogenesis FN	no	CDS	CCT<->CTT	P<->L	yes	893	89.59	1346	93.17	1156	90.83	91.1967	399	90.23	477	88.47	528	88.07	88.9233	308	94.16	258	88.76	244	86.89	89.9367	-2.27333	-1.26	1.01333	ccmFn	245495
245646	G<->A	-	GlmaxMp51	ccmFn	cytochrome c biogenesis FN	no	CDS	CCT<->TCT	P<->S	yes	1306	69.55	1419	69.77	1384	72.04	70.4533	381	59.32	519	63.85	509	63.6	62.2567	291	71.58	260	74.71	235	74.04	73.4433	-8.19667	2.99	11.1867	ccmFn	245646
245692	G<->A	-	GlmaxMp51	ccmFn	cytochrome c biogenesis FN	no	CDS	GCC<->GCT	A<->A	no	1489	39.36	1645	40.55	1506	39.11	39.6733	424	27.29	579	29.53	566	29.86	28.8933	344	27.03	300	24.33	300	29.67	27.01	-10.78	-12.6633	-1.88333	ccmFn	245692
245833	G<->A	-	GlmaxMp51	ccmFn	cytochrome c biogenesis FN	no	CDS	TTC<->TTT	F<->F	no	1276	93.03	1519	93.35	1446	92.32	92.9	514	90.47	659	92.12	632	92.41	91.6667	425	89.18	346	86.13	334	89.22	88.1767	-1.23333	-4.72333	-3.49	ccmFn	245833
245840	G<->A	-	GlmaxMp51	ccmFn	cytochrome c biogenesis FN	no	CDS	TCG<->TTG	S<->L	yes	1254	77.35	1517	81.08	1425	80.49	79.64	516	64.34	646	66.87	634	71.61	67.6067	432	71.3	340	75.29	339	78.76	75.1167	-12.0333	-4.52333	7.51	ccmFn	245840
245919	G<->A	-	GlmaxMp51	ccmFn	cytochrome c biogenesis FN	no	CDS	CTT<->TTT	L<->F	yes	700	78.57	1143	84.43	1197	83.29	82.0967	375	83.2	506	84.58	486	82.3	83.36	319	90.6	262	85.93	259	88.03	88.1867	1.26333	6.09	4.82667	ccmFn	245919
245923	G<->A	-	GlmaxMp51	ccmFn	cytochrome c biogenesis FN	no	CDS	TTC<->TTT	F<->F	no	649	69.85	1035	69.18	1102	75.86	71.63	376	80.85	502	83.86	480	82.5	82.4033	313	87.86	262	86.26	260	87.31	87.1433	10.7733	15.5133	4.74	ccmFn	245923
245937	G<->A	-	GlmaxMp51	ccmFn	cytochrome c biogenesis FN	no	CDS	CGT<->TGT	R<->C	yes	634	79.34	1026	81.48	1122	80.84	80.5533	360	79.5	462	78.4	445	75.11	77.67	288	85.76	241	75.52	244	76.23	79.17	-2.88333	-1.38333	1.5	ccmFn	245937
245939	G<->A	-	GlmaxMp51	ccmFn	cytochrome c biogenesis FN	no	CDS	CCA<->CTA	P<->L	yes	634	90.06	1032	94.19	1109	91.16	91.8033	361	88.64	461	92.41	440	87.76	89.6033	286	91.32	245	86.53	243	89.71	89.1867	-2.2	-2.61667	-0.416667	ccmFn	245939
245946	G<->A	-	GlmaxMp51	ccmFn	cytochrome c biogenesis FN	no	CDS	CGG<->TGG	R<->W	yes	636	84.75	1036	88.61	1120	88.14	87.1667	380	84.78	489	86.33	441	86.17	85.76	284	92.63	245	86.94	251	89.64	89.7367	-1.40667	2.57	3.97667	ccmFn	245946
245954	G<->A	-	GlmaxMp51	ccmFn	cytochrome c biogenesis FN	no	CDS	TCA<->TTA	S<->L	yes	616	81.98	984	85.08	1033	81.91	82.99	395	84.81	496	86.09	460	86.12	85.6733	301	88.7	254	76.47	258	79.46	81.5433	2.68333	-1.44667	-4.13	ccmFn	245954
246051	G<->A	-	GlmaxMp51	ccmFn	cytochrome c biogenesis FN	no	CDS	CCT<->TCT	P<->S	yes	677	84.64	1435	88.86	1215	87.16	86.8867	496	85.89	669	89.39	687	87.48	87.5867	419	88.81	340	90	347	87.03	88.6133	0.7	1.72667	1.02667	ccmFn	246051
246060	G<->A	-	GlmaxMp51	ccmFn	cytochrome c biogenesis FN	no	CDS	CGT<->TGT	R<->C	yes	652	86.81	1446	91.63	1219	90.24	89.56	509	89.8	681	92.51	711	91.56	91.29	441	92.97	342	94.15	363	90.63	92.5833	1.73	3.02333	1.29333	ccmFn	246060
246065	G<->A	-	GlmaxMp51	ccmFn	cytochrome c biogenesis FN	no	CDS	TCG<->TTG	S<->L	yes	663	93.22	1453	95.73	1261	95.64	94.8633	510	90.61	676	94.97	713	93.69	93.09	443	95.5	336	94.94	363	88.98	93.14	-1.77333	-1.72333	0.05	ccmFn	246065
246104	G<->A	-	GlmaxMp51	ccmFn	cytochrome c biogenesis FN	no	CDS	CCT<->CTT	P<->L	yes	768	89.06	1503	93.28	1312	92	91.4467	524	88.74	688	91.42	701	89.87	90.01	434	93.79	320	91.88	371	88.41	91.36	-1.43667	-0.0866667	1.35	ccmFn	246104
246164	G<->A	-	GlmaxMp51	ccmFn	cytochrome c biogenesis FN	no	CDS	CCG<->CTG	P<->L	yes	775	59.87	1082	67.84	931	64.02	63.91	543	71.09	644	72.09	654	69.88	71.02	423	71.63	316	75	350	67.52	71.3833	7.11	7.47333	0.363333	ccmFn	246164
249476	C<->T	+	GlmaxMp52	rps4	ribosomal protein S4	no	CDS	TCA<->TTA	S<->L	yes	1904	60.77	1061	66.26	2182	64.16	63.73	1915	71.91	2234	67.02	2276	68.72	69.2167	2815	82.75	2399	82.97	2211	82.5	82.74	5.48667	19.01	13.5233	rps4	249476
249487	C<->T	+	GlmaxMp52	rps4	ribosomal protein S4	no	CDS	CGG<->TGG	R<->W	yes	1883	72.17	1073	73.44	2172	74.59	73.4	1979	80.2	2333	76.46	2360	76.41	77.69	2936	90.91	2513	89.98	2305	89.42	90.1033	4.29	16.7033	12.4133	rps4	249487
249571	C<->T	+	GlmaxMp52	rps4	ribosomal protein S4	no	CDS	CCG<->TCG	P<->S	yes	1710	66.37	1020	70.98	2017	68.32	68.5567	2002	78.14	2455	77.3	2287	76.27	77.2367	3009	91.13	2557	91.08	2285	91.13	91.1133	8.68	22.5567	13.8767	rps4	249571
249602	C<->T	+	GlmaxMp52	rps4	ribosomal protein S4	no	CDS	TCA<->TTA	S<->L	yes	1777	68.94	1017	71.78	2170	76.74	72.4867	2083	86.06	2577	84.02	2396	84.2	84.76	3125	93.61	2729	93.99	2332	93.31	93.6367	12.2733	21.15	8.87667	rps4	249602
249622	C<->T	+	GlmaxMp52	rps4	ribosomal protein S4	no	CDS	CCC<->TCC	P<->S	yes	1818	59.41	1020	63.63	2206	68.81	63.95	1927	78.95	2428	77.58	2236	76.94	77.8233	2847	91.37	2480	91.3	2130	90.35	91.0067	13.8733	27.0567	13.1833	rps4	249622
249631	C<->T	+	GlmaxMp52	rps4	ribosomal protein S4	no	CDS	CAT<->TAT	H<->Y	yes	1959	53.34	1075	54.98	2413	61.75	56.69	1880	65.16	2379	64.16	2206	64.93	64.75	2775	74.47	2406	75.49	2089	73.34	74.4333	8.06	17.7433	9.68333	rps4	249631
249704	C<->T	+	GlmaxMp52	rps4	ribosomal protein S4	no	CDS	CCA<->CTA	P<->L	yes	1764	71.5	1021	68.85	2238	78.87	73.0733	1884	79.9	2167	77.59	2115	78.61	78.7	2534	91.01	2270	90.36	2008	89.5	90.29	5.62667	17.2167	11.59	rps4	249704
249716	C<->T	+	GlmaxMp52	rps4	ribosomal protein S4	no	CDS	TCG<->TTG	S<->L	yes	1789	69.31	1003	69.49	2258	78.21	72.3367	1895	83.08	2208	81.48	2185	81.76	82.1067	2656	93.56	2357	93.68	2106	92.7	93.3133	9.77	20.9767	11.2067	rps4	249716
249728	C<->T	+	GlmaxMp52	rps4	ribosomal protein S4	no	CDS	CCG<->CTG	P<->L	yes	1802	72.25	1029	71.04	2298	80.07	74.4533	1948	81.72	2283	80.33	2261	80.63	80.8933	2720	92.21	2411	92.5	2198	91.86	92.19	6.44	17.7367	11.2967	rps4	249728
249745	C<->T	+	GlmaxMp52	rps4	ribosomal protein S4	no	CDS	CGT<->TGT	R<->C	yes	1871	29.01	1112	33.96	2412	36.86	33.2767	1895	39.42	2213	32.79	2234	40.04	37.4167	2653	61.44	2366	59.67	2168	56.29	59.1333	4.14	25.8567	21.7167	rps4	249745
249773	C<->T	+	GlmaxMp52	rps4	ribosomal protein S4	no	CDS	CCG<->CTG	P<->L	yes	1727	81.64	1086	79.67	2332	86.96	82.7567	1763	88.88	2092	85.86	2103	87.93	87.5567	2480	95.36	2176	95	2005	94.42	94.9267	4.8	12.17	7.37	rps4	249773
249902	C<->T	+	GlmaxMp52	rps4	ribosomal protein S4	no	CDS	TCT<->TTT	S<->F	yes	1451	76.22	775	71.35	1606	78.02	75.1967	1850	78.9	2243	79.14	2175	77.23	78.4233	2693	91.73	2369	92.17	2216	92.02	91.9733	3.22667	16.7767	13.55	rps4	249902
249920	C<->T	+	GlmaxMp52	rps4	ribosomal protein S4	no	CDS	TCA<->TTA	S<->L	yes	1717	86.73	813	78.84	1711	88.72	84.7633	1930	93.43	2334	94.36	2256	92.62	93.47	2807	96.83	2473	96.61	2289	96.25	96.5633	8.70667	11.8	3.09333	rps4	249920
250281	C<->T	+	GlmaxMp52	rps4	ribosomal protein S4	no	CDS	ACC<->ACT	T<->T	no	2528	81.8	902	83.48	2162	81.59	82.29	1554	77.17	1722	75.67	1792	75.74	76.1933	2225	90.3	1918	88.8	1755	88.49	89.1967	-6.09667	6.90667	13.0033	rps4	250281
250355	C<->T	+	GlmaxMp52	rps4	ribosomal protein S4	no	CDS	TCG<->TTG	S<->L	yes	2791	77.34	936	80.98	2075	78.36	78.8933	1644	70.11	1887	68.22	1828	68.33	68.8867	2451	86.51	2059	84.58	1876	85.52	85.5367	-10.0067	6.64333	16.65	rps4	250355
250366	C<->T	+	GlmaxMp52	rps4	ribosomal protein S4	no	CDS	CAT<->TAT	H<->Y	yes	2735	82.71	938	87.74	2071	83.29	84.58	1649	83.45	1911	84.74	1807	85.15	84.4467	2502	95.37	2120	94.3	1897	95.32	94.9967	-0.133333	10.4167	10.55	rps4	250366
250376	C<->T	+	GlmaxMp52	rps4	ribosomal protein S4	no	CDS	CCA<->CTA	P<->L	yes	2724	83.05	915	87.98	2063	84.59	85.2067	1685	83.94	1932	86.3	1835	85.35	85.1967	2566	94.31	2146	93.35	1923	94.02	93.8933	-0.01	8.68667	8.69667	rps4	250376
250441	C<->T	+	GlmaxMp52	rps4	ribosomal protein S4	no	CDS	CCA<->TCA	P<->S	yes	2268	7.8	690	10.58	1721	8.72	9.03333	1569	5.79	1783	6.39	1640	7.19	6.45667	2503	20.84	2044	21.57	1836	23.95	22.12	-2.57667	13.0867	15.6633	rps4	250441
250442	C<->T	+	GlmaxMp52	rps4	ribosomal protein S4	no	CDS	CCA<->TTA	P<->L	yes	2274	77.75	687	85.88	1717	79.56	81.0633	1568	81.12	1786	82.6	1635	82.62	82.1133	2496	92.47	2045	90.73	1830	92.53	91.91	1.05	10.8467	9.79667	rps4	250442
250451	C<->T	+	GlmaxMp52	rps4	ribosomal protein S4	no	CDS	CCT<->CTT	P<->L	yes	2271	75.62	687	83.11	1754	76.51	78.4133	1561	80.92	1767	82.99	1631	82.27	82.06	2477	92.68	2035	91.95	1838	93.37	92.6667	3.64667	14.2533	10.6067	rps4	250451
250456	C<->T	+	GlmaxMp52	rps4	ribosomal protein S4	no	CDS	CGG<->TGG	R<->W	yes	2296	74.61	691	82.34	1765	75.58	77.51	1555	78.23	1753	80.44	1620	80.94	79.87	2469	91.87	2022	90.76	1831	92.14	91.59	2.36	14.08	11.72	rps4	250456
251261	C<->T	+	GlmaxMp53	rps1	ribosomal protein S1	no	CDS	TCC<->TCT	S<->S	no	2268	18.77	771	19.84	2051	20.87	19.8267	1891	16.17	2035	16.22	2105	17.93	16.7733	2026	17.74	1635	17.98	1586	19.13	18.2833	-3.05333	-1.54333	1.51	rps1	251261
251377	C<->T	+	GlmaxMp53	rps1	ribosomal protein S1	no	CDS	CCT<->CTT	P<->L	yes	2462	84.48	765	84.58	1689	85.67	84.91	2353	80.91	2516	79.95	2552	80.09	80.3167	2645	91.02	2236	90.4	2004	89.7	90.3733	-4.59333	5.46333	10.0567	rps1	251377
251428	C<->T	+	GlmaxMp53	rps1	ribosomal protein S1	no	CDS	TCC<->TTC	S<->F	yes	929	64.48	266	67.67	551	65.46	65.87	2051	75.27	2185	74.73	2106	73.24	74.4133	2182	86.26	1860	85.14	1726	85.81	85.7367	8.54333	19.8667	11.3233	rps1	251428
252091	C<->T	+	GlmaxMp05-1	nad5	NADH dehydrogenase subunit 5	yes	CDS	TTC<->TTT	F<->F	no	1523	27.25	2299	30.88	4002	25.94	28.0233	2782	24.11	2848	25.86	2792	23.99	24.6533	3024	36.94	2559	37.29	2357	37.45	37.2267	-3.37	9.20333	12.5733	nad5	252091
252189	C<->T	+	GlmaxMp05-1	nad5	NADH dehydrogenase subunit 5	yes	CDS	CCG<->CTG	P<->L	yes	1190	84.12	1234	88.49	2145	90.49	87.7	1689	82.65	1722	81.96	1694	82.29	82.3	1672	92.34	1523	92.98	1333	91.75	92.3567	-5.4	4.65667	10.0567	nad5	252189
253114	C<->T	+	GlmaxMp05-1	nad5	NADH dehydrogenase subunit 5	yes	intronic	NA	NA	NA	1043	69.42	649	75.19	1065	71.83	72.1467	1265	72.08	1552	74.28	1450	72.42	72.9267	1465	88.81	1167	85.1	1066	85.27	86.3933	0.78	14.2467	13.4667	nad5	253114
253135	C<->T	+	GlmaxMp05-1	nad5	NADH dehydrogenase subunit 5	yes	CDS	CCG<->CTG	P<->L	yes	850	88.73	635	90.71	1094	92.14	90.5267	1329	93.08	1486	92.13	1385	92.5	92.57	1497	96.46	1190	95.04	1091	94.42	95.3067	2.04333	4.78	2.73667	nad5	253135
253165	C<->T	+	GlmaxMp05-1	nad5	NADH dehydrogenase subunit 5	yes	CDS	TCC<->TTC	S<->F	yes	1075	84.09	1090	92.84	1684	88.84	88.59	1775	90.15	1901	88.75	1900	91.54	90.1467	2091	96.7	1711	96.08	1567	95.98	96.2533	1.55667	7.66333	6.10667	nad5	253165
253251	C<->T	+	GlmaxMp05-1	nad5	NADH dehydrogenase subunit 5	yes	CDS	CTT<->TTT	L<->F	yes	2285	98.91	2166	99.12	3707	99.03	99.02	2586	98.22	2729	98.32	2736	98.58	98.3733	3067	99.35	2686	99.14	2406	98.63	99.04	-0.646667	0.02	0.666667	nad5	253251
253267	C<->T	+	GlmaxMp05-1	nad5	NADH dehydrogenase subunit 5	yes	CDS	CCA<->CTA	P<->L	yes	2634	95.37	2419	96.98	4241	96.75	96.3667	2677	95.93	2817	95.31	2842	95.78	95.6733	3160	98.92	2808	98.65	2523	98.38	98.65	-0.693333	2.28333	2.97667	nad5	253267
253291	C<->T	+	GlmaxMp05-1	nad5	NADH dehydrogenase subunit 5	yes	CDS	TCT<->TTT	S<->F	yes	2867	97.17	2303	97.74	3914	97.39	97.4333	2993	95.8	3163	95.23	3205	95.41	95.48	3613	98.15	3191	97.53	2938	97.58	97.7533	-1.95333	0.32	2.27333	nad5	253291
253352	C<->T	+	GlmaxMp05-1	nad5	NADH dehydrogenase subunit 5	yes	CDS	TTC<->TTT	F<->F	no	4015	63.96	2952	63.89	5645	63.88	63.91	4498	49.9	4805	48.86	4964	52.49	50.4167	5573	54.85	4835	54.53	4441	57.07	55.4833	-13.4933	-8.42667	5.06667	nad5	253352
253387	C<->T	+	GlmaxMp05-1	nad5	NADH dehydrogenase subunit 5	yes	CDS	ACA<->ATA	T<->I	yes	3506	96.81	3177	98.9	5944	97.78	97.83	4478	98.01	4831	97.91	4818	97.99	97.97	5552	99.08	4842	99.15	4395	98.86	99.03	0.14	1.2	1.06	nad5	253387
253399	C<->T	+	GlmaxMp05-1	nad5	NADH dehydrogenase subunit 5	yes	CDS	CCT<->CTT	P<->L	yes	3631	95.76	3370	97.77	6337	97.14	96.89	4589	97.32	4975	96.81	4974	96.85	96.9933	5682	98.68	5003	98.38	4491	98.22	98.4267	0.103333	1.53667	1.43333	nad5	253399
253432	C<->T	+	GlmaxMp05-1	nad5	NADH dehydrogenase subunit 5	yes	CDS	CCT<->CTT	P<->L	yes	3464	96.91	3425	97.69	6290	97.71	97.4367	5266	97.72	5791	97.48	5716	97.38	97.5267	6593	98.49	5728	98.03	5127	98.27	98.2633	0.09	0.826667	0.736667	nad5	253432
253441	C<->T	+	GlmaxMp05-1	nad5	NADH dehydrogenase subunit 5	yes	CDS	TCG<->TTG	S<->L	yes	3302	94.79	3362	96.52	6151	96.05	95.7867	5102	95.73	5589	94.84	5604	95.12	95.23	6379	98.5	5578	98.28	4979	98.37	98.3833	-0.556667	2.59667	3.15333	nad5	253441
253446	C<->T	+	GlmaxMp05-1	nad5	NADH dehydrogenase subunit 5	yes	CDS	CGT<->TGT	R<->C	yes	3213	95.86	3367	96.47	6094	97.46	96.5967	5121	97.46	5634	97.18	5666	97.09	97.2433	6403	98.11	5617	97.51	5007	97.58	97.7333	0.646667	1.13667	0.49	nad5	253446
253491	C<->T	+	GlmaxMp05-1	nad5	NADH dehydrogenase subunit 5	yes	CDS	CGT<->TGT	R<->C	yes	4273	96.86	4151	97.42	7262	97.22	97.1667	5413	97.12	5880	97.08	6048	96.68	96.96	6836	98.83	6031	98.39	5327	98.29	98.5033	-0.206667	1.33667	1.54333	nad5	253491
253501	C<->T	+	GlmaxMp05-1	nad5	NADH dehydrogenase subunit 5	yes	CDS	GCC<->GTC	A<->V	yes	3833	95.62	3582	96.32	6342	96.23	96.0567	4671	93.6	5081	93.63	5284	93.77	93.6667	5866	96.46	5223	96.21	4584	95.57	96.08	-2.39	0.0233333	2.41333	nad5	253501
253522	C<->T	+	GlmaxMp05-1	nad5	NADH dehydrogenase subunit 5	yes	CDS	TCT<->TTT	S<->F	yes	4471	97.61	4027	97.69	6976	97.18	97.4933	5094	96.94	5436	96.75	5696	96.9	96.8633	6312	99.02	5557	98.62	4982	98.6	98.7467	-0.63	1.25333	1.88333	nad5	253522
253569	C<->T	+	GlmaxMp05-1	nad5	NADH dehydrogenase subunit 5	yes	CDS	CTT<->TTT	L<->F	yes	5496	97.83	3717	98.68	6309	98.53	98.3467	4527	97.88	4872	97.89	5149	98.08	97.95	5519	99.02	4888	98.53	4442	98.33	98.6267	-0.396667	0.28	0.676667	nad5	253569
253606	C<->T	+	GlmaxMp05-1	nad5	NADH dehydrogenase subunit 5	yes	CDS	TCG<->TTG	S<->L	yes	6745	96.96	4215	97.51	6903	97.39	97.2867	4257	97	4547	97.05	4822	96.93	96.9933	5227	99.24	4668	98.72	4261	98.69	98.8833	-0.293333	1.59667	1.89	nad5	253606
253618	C<->T	+	GlmaxMp05-1	nad5	NADH dehydrogenase subunit 5	yes	CDS	TCA<->TTA	S<->L	yes	6770	99.26	4423	99.16	6973	99.44	99.2867	4262	98.78	4612	99.05	4865	98.91	98.9133	5358	99.48	4750	98.8	4353	98.9	99.06	-0.373333	-0.226667	0.146667	nad5	253618
253728	C<->T	+	GlmaxMp05-1	nad5	NADH dehydrogenase subunit 5	yes	CDS	CCA<->TCA	P<->S	yes	5209	96.74	4885	97.13	6385	96.43	96.7667	3121	90.59	3491	89.43	3737	89.89	89.97	4158	95.53	3566	95.58	3423	95.56	95.5567	-6.79667	-1.21	5.58667	nad5	253728
253756	C<->T	+	GlmaxMp05-1	nad5	NADH dehydrogenase subunit 5	yes	CDS	TCT<->TTT	S<->F	yes	5522	98.93	5369	99.18	7080	98.98	99.03	3299	98.61	3726	98.61	3913	98.39	98.5367	4267	99.42	3728	99.22	3516	99.15	99.2633	-0.493333	0.233333	0.726667	nad5	253756
253768	C<->T	+	GlmaxMp05-1	nad5	NADH dehydrogenase subunit 5	yes	CDS	ACG<->ATG	T<->M	yes	5506	95.73	5218	96.24	6937	96.31	96.0933	3405	90.6	3829	91.57	4032	89.76	90.6433	4357	94.7	3849	94.62	3591	94.35	94.5567	-5.45	-1.53667	3.91333	nad5	253768
254168	C<->T	+	GlmaxMp05-1	nad5	NADH dehydrogenase subunit 5	yes	CDS	GTC<->GTT	V<->V	no	4612	24.59	3329	23.88	4163	18.26	22.2433	2882	8.36	3188	7.24	3166	7.23	7.61	3425	7.27	2993	7.84	2758	7.83	7.64667	-14.6333	-14.5967	0.0366667	nad5	254168
254203	C<->T	+	GlmaxMp05-1	nad5	NADH dehydrogenase subunit 5	yes	CDS	TCA<->TTA	S<->L	yes	4239	98.07	3139	98.09	3575	98.1	98.0867	2436	97.58	2765	97.36	2732	97.88	97.6067	2970	98.96	2568	99.14	2395	98.91	99.0033	-0.48	0.916667	1.39667	nad5	254203
254609	C<->T	+	GlmaxMp05-1	nad5	NADH dehydrogenase subunit 5	yes	intronic	NA	NA	NA	761	58.34	597	68.34	700	63.71	63.4633	831	67.91	1037	70.23	984	73.43	70.5233	959	83.87	740	80.43	749	84.53	82.9433	7.06	19.48	12.42	nad5	254609
255398	C<->T	+	GlmaxMp05-1	nad5	NADH dehydrogenase subunit 5	yes	intronic	NA	NA	NA	355	27.32	332	22.59	490	24.08	24.6633	299	27.33	395	21.77	387	34.02	27.7067	326	42.94	270	39.26	260	38.08	40.0933	3.04333	15.43	12.3867	nad5	255398
256109	C<->T	+	GlmaxMp05-1	nad5	NADH dehydrogenase subunit 5	yes	intronic	NA	NA	NA	1892	22.41	1770	22.18	1717	16.16	20.25	992	5.54	1151	5.9	1071	8.57	6.67	1050	7.99	910	9.43	855	8.52	8.64667	-13.58	-11.6033	1.97667	nad5	256109
256184	C<->T	+	GlmaxMp05-1	nad5	NADH dehydrogenase subunit 5	yes	intronic	NA	NA	NA	2360	18.64	2882	14.08	2896	16.51	16.41	1333	8.02	1583	7.94	1547	8.53	8.16333	1526	8.25	1362	8.36	1217	8.55	8.38667	-8.24667	-8.02333	0.223333	nad5	256184
256221	C<->T	+	GlmaxMp05-1	nad5	NADH dehydrogenase subunit 5	yes	intronic	NA	NA	NA	3215	56.83	3838	58.03	3838	55.42	56.76	1686	35.58	2073	34.14	2054	36.96	35.56	2102	43.49	1920	46.9	1652	44.53	44.9733	-21.2	-11.7867	9.41333	nad5	256221
256231	C<->T	+	GlmaxMp05-1	nad5	NADH dehydrogenase subunit 5	yes	intronic	NA	NA	NA	3363	67.92	4074	70.32	4104	65.77	68.0033	1814	60.1	2194	61.92	2208	61.97	61.33	2249	60.83	2095	62.82	1787	61.63	61.76	-6.67333	-6.24333	0.43	nad5	256231
256308	C<->T	+	GlmaxMp05-1	nad5	NADH dehydrogenase subunit 5	yes	intronic	NA	NA	NA	4826	29.86	5743	32.82	5589	30.72	31.1333	2516	19.91	3067	21.87	3176	24.08	21.9533	3232	24.84	2874	26.24	2547	24.66	25.2467	-9.18	-5.88667	3.29333	nad5	256308
256315	C<->T	+	GlmaxMp05-1	nad5	NADH dehydrogenase subunit 5	yes	intronic	NA	NA	NA	4808	89.75	5711	91.82	5505	88.99	90.1867	2499	85.18	3060	84.96	3187	86.18	85.44	3208	87.99	2874	88.19	2551	87.9	88.0267	-4.74667	-2.16	2.58667	nad5	256315
256337	C<->T	+	GlmaxMp05-1	nad5	NADH dehydrogenase subunit 5	yes	intronic	NA	NA	NA	5412	91.02	6261	92.3	5976	88.76	90.6933	2680	83.11	3318	84.21	3415	83.47	83.5967	3318	87.35	2963	89.21	2790	87.92	88.16	-7.09667	-2.53333	4.56333	nad5	256337
256346	C<->T	+	GlmaxMp05-1	nad5	NADH dehydrogenase subunit 5	yes	intronic	NA	NA	NA	5553	86.52	6111	86.89	5976	83.72	85.71	2649	73.98	3314	76.06	3424	75.34	75.1267	3346	81.4	2966	82.87	2801	82.39	82.22	-10.5833	-3.49	7.09333	nad5	256346
256361	C<->T	+	GlmaxMp05-1	nad5	NADH dehydrogenase subunit 5	yes	intronic	NA	NA	NA	5871	87.57	6260	88.19	6153	84.46	86.74	2636	77.52	3327	77.64	3415	76.7	77.2867	3331	84.29	2941	86.16	2810	85.1	85.1833	-9.45333	-1.55667	7.89667	nad5	256361
256382	C<->T	+	GlmaxMp05-1	nad5	NADH dehydrogenase subunit 5	yes	intronic	NA	NA	NA	5794	83.38	5651	86.36	5761	83.29	84.3433	2711	75.64	3344	74.68	3428	75.54	75.2867	3416	80.44	3094	79.83	2842	80.53	80.2667	-9.05667	-4.07667	4.98	nad5	256382
256395	C<->T	+	GlmaxMp05-1	nad5	NADH dehydrogenase subunit 5	yes	intronic	NA	NA	NA	5452	17.2	5003	16.75	5164	16.3	16.75	2566	4.79	3154	5.58	3229	5.51	5.29333	3203	3.18	2928	3.21	2680	3.73	3.37333	-11.4567	-13.3767	-1.92	nad5	256395
256424	C<->T	+	GlmaxMp05-1	nad5	NADH dehydrogenase subunit 5	yes	intronic	NA	NA	NA	5028	85.94	4110	86.82	4432	84.05	85.6033	2336	75.99	2888	76.81	2933	77.56	76.7867	2919	82.74	2634	84.81	2436	82.93	83.4933	-8.81667	-2.11	6.70667	nad5	256424
256776	C<->T	+	GlmaxMp55	atp1-2	ATPase subunit 1	no	CDS	ACC<->ACT	T<->T	no	4683	35.11	4573	38.88	5999	38.07	37.3533	3859	20.89	4268	19.49	3900	18.45	19.61	4584	17.18	3868	15.09	3550	15.57	15.9467	-17.7433	-21.4067	-3.66333	atp1-2	256776
257559	C<->T	+	GlmaxMp55	atp1-2	ATPase subunit 1	no	CDS	ACC<->ACT	T<->T	no	2298	57.46	2787	56.3	3009	52.47	55.41	1842	29.17	2005	25.34	2107	28.52	27.6767	2655	30.56	2077	28.8	1978	30.45	29.9367	-27.7333	-25.4733	2.26	atp1-2	257559
258873	C<->T	+	GlmaxMp05-1	nad5	NADH dehydrogenase subunit 5	yes	intronic	NA	NA	NA	880	70.45	453	63.58	278	56.83	63.62	862	55.92	914	55.96	819	56.76	56.2133	1295	70.35	1031	71.71	954	72.12	71.3933	-7.40667	7.77333	15.18	nad5	258873
267615	C<->T	+	GlmaxMp05-3	nad5	NADH dehydrogenase subunit 5	yes	CDS	CCC<->CTC	P<->L	yes	5422	95.37	6231	96.07	5170	94.9	95.4467	3307	94.77	3758	94.92	3701	94.7	94.7967	3611	96.79	3258	97.15	3025	97.46	97.1333	-0.65	1.68667	2.33667	nad5	267615
267675	C<->T	+	GlmaxMp05-3	nad5	NADH dehydrogenase subunit 5	yes	CDS	ACC<->ATC	T<->I	yes	5836	98.2	6442	98.74	6745	98.93	98.6233	4722	98.56	5211	98.68	5152	98.64	98.6267	5243	99.54	4842	99.53	4483	99.31	99.46	0.00333333	0.836667	0.833333	nad5	267675
267705	C<->T	+	GlmaxMp05-3	nad5	NADH dehydrogenase subunit 5	yes	CDS	TCA<->TTA	S<->L	yes	6377	84.98	7934	90.26	7844	88.89	88.0433	5531	86.37	6115	85.76	6154	83.62	85.25	6468	87.32	5998	89.11	5346	88.79	88.4067	-2.79333	0.363333	3.15667	nad5	267705
267714	C<->T	+	GlmaxMp05-3	nad5	NADH dehydrogenase subunit 5	yes	CDS	TCT<->TTT	S<->F	yes	6432	93.25	7816	95.73	7689	95.38	94.7867	5611	91.99	6206	91.67	6289	91.05	91.57	6599	94.28	6114	94.86	5479	95.41	94.85	-3.21667	0.0633333	3.28	nad5	267714
267735	C<->T	+	GlmaxMp05-3	nad5	NADH dehydrogenase subunit 5	yes	CDS	CCC<->CTC	P<->L	yes	6511	85.5	7997	90.8	7849	89.38	88.56	6398	91.15	7137	91.82	7261	89.87	90.9467	7785	89.62	7284	89.45	6479	91.19	90.0867	2.38667	1.52667	-0.86	nad5	267735
267790	C<->T	+	GlmaxMp05-3	nad5	NADH dehydrogenase subunit 5	yes	CDS	CTC<->CTT	L<->L	no	6599	11.85	8211	12.71	8204	12.5	12.3533	6335	14.24	7096	13.49	7232	14.21	13.98	7807	19.49	7641	19.12	6640	19.55	19.3867	1.62667	7.03333	5.40667	nad5	267790
268940	C<->T	+	GlmaxMp05-3	nad5	NADH dehydrogenase subunit 5	yes	CDS	TCA<->TTA	S<->L	yes	4021	91.72	2839	93.59	2151	91.4	92.2367	2258	92.12	2628	92.62	2474	92.41	92.3833	2628	96.58	2409	97.51	2244	96.75	96.9467	0.146667	4.71	4.56333	nad5	268940
268963	C<->T	+	GlmaxMp05-3	nad5	NADH dehydrogenase subunit 5	yes	CDS	CGT<->TGT	R<->C	yes	3130	96.43	2601	97.96	1920	97.08	97.1567	2635	96.43	3058	96.31	2869	96.03	96.2567	3088	98	2789	98.32	2638	98.03	98.1167	-0.9	0.96	1.86	nad5	268963
289161	C<->T	+	GlmaxMp61	nad9	NADH dehydrogenase subunit 9	no	CDS	TCC<->TTC	S<->F	yes	5505	79.95	8528	80.8	8468	81.36	80.7033	3611	78.03	4803	79.09	4732	79.07	78.73	5351	88.75	5052	89.52	5441	89.91	89.3933	-1.97333	8.69	10.6633	nad9	289161
289239	C<->T	+	GlmaxMp61	nad9	NADH dehydrogenase subunit 9	no	CDS	TCT<->TTT	S<->F	yes	7803	97.35	8391	98.71	8472	98.3	98.12	4328	95.38	5582	95.11	5474	95.59	95.36	6368	98.53	6014	98.65	6460	98.55	98.5767	-2.76	0.456667	3.21667	nad9	289239
289314	C<->T	+	GlmaxMp61	nad9	NADH dehydrogenase subunit 9	no	CDS	TCG<->TTG	S<->L	yes	8349	98.22	8399	99.01	8388	98.71	98.6467	4726	96.77	5604	95.94	5736	96.58	96.43	6592	98.97	6174	98.85	6665	98.65	98.8233	-2.21667	0.176667	2.39333	nad9	289314
289445	C<->T	+	GlmaxMp61	nad9	NADH dehydrogenase subunit 9	no	CDS	CCG<->TCG	P<->S	yes	8393	97.32	8523	98.3	8231	98.18	97.9333	5147	95	5970	94.62	6293	95.32	94.98	7114	98.22	6759	97.86	7078	98.09	98.0567	-2.95333	0.123333	3.07667	nad9	289445
289475	C<->T	+	GlmaxMp61	nad9	NADH dehydrogenase subunit 9	no	CDS	CGG<->TGG	R<->W	yes	8290	98.24	8406	99.26	8451	99.02	98.84	4820	96.16	5673	95.28	5970	95.85	95.7633	6746	97.05	6404	96.32	6740	95.3	96.2233	-3.07667	-2.61667	0.46	nad9	289475
289515	C<->T	+	GlmaxMp61	nad9	NADH dehydrogenase subunit 9	no	CDS	TCC<->TTC	S<->F	yes	7827	98.48	8219	98.91	8245	98.8	98.73	6530	95.42	7627	94.76	7888	94.91	95.03	8835	98.84	8552	98.63	8784	98.61	98.6933	-3.7	-0.0366667	3.66333	nad9	289515
289545	C<->T	+	GlmaxMp61	nad9	NADH dehydrogenase subunit 9	no	CDS	TCA<->TTA	S<->L	yes	8229	97.16	8810	98.04	8669	97.6	97.6	6899	95.29	8028	95.24	8005	95.08	95.2033	8280	97.69	8236	97.78	8178	97.52	97.6633	-2.39667	0.0633333	2.46	nad9	289545
289586	C<->T	+	GlmaxMp61	nad9	NADH dehydrogenase subunit 9	no	CDS	CTT<->TTT	L<->F	yes	8079	96.74	7816	98.12	7560	97.84	97.5667	7730	95.7	8333	94.78	8429	95.03	95.17	8688	98.81	8607	98.54	8512	98.42	98.59	-2.39667	1.02333	3.42	nad9	289586
308138	G<->A	-	GlmaxMp69	rpl16	ribosomal protein L16	no	CDS	TCG<->TTG	S<->L	yes	5949	96.39	4331	97.11	5163	96.92	96.8067	2301	93.96	2900	93.9	2619	94.13	93.9967	4530	97.55	4456	97.71	3852	97.04	97.4333	-2.81	0.626667	3.43667	rpl16	308138
308144	G<->A	-	GlmaxMp69	rpl16	ribosomal protein L16	no	CDS	CCA<->CTA	P<->L	yes	5990	96.08	4406	97.16	5288	96.63	96.6233	2320	93.08	2898	93.25	2625	94.56	93.63	4549	98	4503	97.63	3844	97.22	97.6167	-2.99333	0.993333	3.98667	rpl16	308144
308441	G<->A	-	GlmaxMp69	rpl16	ribosomal protein L16	no	CDS	ACT<->ATT	T<->I	yes	5695	98.42	2697	98.15	4121	97.94	98.17	1627	95.7	2028	97.34	1943	96.56	96.5333	2369	97.97	2125	97.79	1818	97.03	97.5967	-1.63667	-0.573333	1.06333	rpl16	308441
308589	G<->A	-	GlmaxMp70	rps3	ribosomal protein S3	no	CDS	CTC<->CTT	L<->L	no	4496	84.63	2284	86.34	3951	86.64	85.87	1407	79.05	1769	79.29	1660	80.08	79.4733	1910	87.53	1712	88.86	1430	87.53	87.9733	-6.39667	2.10333	8.5	rps3	308589
308653	G<->A	-	GlmaxMp70	rps3	ribosomal protein S3	no	CDS	TCG<->TTG	S<->L	yes	3494	75.68	1365	77.53	2892	81.15	78.12	1334	69.51	1668	68.24	1461	69.72	69.1567	1790	68.36	1557	68.14	1309	69.63	68.71	-8.96333	-9.41	-0.446667	rps3	308653
308706	G<->A	-	GlmaxMp70	rps3	ribosomal protein S3	no	CDS	ATC<->ATT	I<->I	no	4428	96.12	1552	95.49	3273	96.61	96.0733	1333	94.7	1671	94.08	1588	94.21	94.33	1839	94.13	1562	96.67	1312	95.51	95.4367	-1.74333	-0.636667	1.10667	rps3	308706
308844	G<->A	-	GlmaxMp70	rps3	ribosomal protein S3	no	CDS	TCC<->TCT	S<->S	no	2562	91.69	1611	93.48	3304	92.8	92.6567	1563	91.88	1847	90.37	1803	91.35	91.2	1893	96.04	1750	96.58	1488	94.96	95.86	-1.45667	3.20333	4.66	rps3	308844
309177	G<->A	-	GlmaxMp70	rps3	ribosomal protein S3	no	CDS	TCC<->TCT	S<->S	no	2152	96	1302	95.55	2533	96.25	95.9333	1019	91.67	1290	92.1	1187	93.19	92.32	1143	94.06	1103	93.38	903	92.48	93.3067	-3.61333	-2.62667	0.986667	rps3	309177
309318	G<->A	-	GlmaxMp70	rps3	ribosomal protein S3	no	CDS	CTC<->CTT	L<->L	no	2925	82.6	1433	87.51	2622	86.01	85.3733	1120	71.33	1246	76.02	1256	70.38	72.5767	1143	81.31	1038	78.92	990	82.34	80.8567	-12.7967	-4.51667	8.28	rps3	309318
309492	G<->A	-	GlmaxMp70	rps3	ribosomal protein S3	no	CDS	TTC<->TTT	F<->F	no	2684	92.36	1109	89.72	2240	90.94	91.0067	999	87.99	1195	88.39	1190	88.83	88.4033	1167	94	1021	93.54	885	93.24	93.5933	-2.60333	2.58667	5.19	rps3	309492
309693	G<->A	-	GlmaxMp70	rps3	ribosomal protein S3	no	CDS	ATC<->ATT	I<->I	no	2455	82.65	835	75.93	1801	84.13	80.9033	1200	80.81	1452	81.36	1372	81.08	81.0833	1454	87.98	1133	87.84	1056	88.09	87.97	0.18	7.06667	6.88667	rps3	309693
309986	G<->A	-	GlmaxMp70	rps3	ribosomal protein S3	no	CDS	CTT<->TTT	L<->F	yes	2248	8.67	1020	10.1	1986	11.48	10.0833	615	7.77	753	10.49	762	9.16	9.14	721	19.53	573	18.43	505	17.62	18.5267	-0.943333	8.44333	9.38667	rps3	309986
311517	G<->A	-	GlmaxMp70	rps3	ribosomal protein S3	no	CDS	TCG<->TTG	S<->L	yes	670	68.36	397	62.47	703	66.29	65.7067	851	70.54	990	66.97	1039	65.96	67.8233	769	70.95	668	67.76	613	63.68	67.4633	2.11667	1.75667	-0.36	rps3	311517
318277	G<->A	-	GlmaxMp31-2	nad2	NADH dehydrogenase subunit 2	yes	CDS	TCA<->TTA	S<->L	yes	968	95.35	3663	98.77	2817	98.44	97.52	2647	98.91	3113	98.97	2896	98.69	98.8567	2912	99.04	2714	99.19	2601	99.04	99.09	1.33667	1.57	0.233333	nad2	318277
318318	G<->A	-	GlmaxMp31-2	nad2	NADH dehydrogenase subunit 2	yes	CDS	CCC<->CCT	P<->P	no	1253	84.44	4691	89.81	3406	85.27	86.5067	3256	83.82	3837	83.01	3579	83.32	83.3833	3546	81.01	3205	83.76	3211	82.59	82.4533	-3.12333	-4.05333	-0.93	nad2	318318
318325	G<->A	-	GlmaxMp31-2	nad2	NADH dehydrogenase subunit 2	yes	CDS	CCA<->CTA	P<->L	yes	1255	92.75	4677	97.61	3402	96.47	95.61	3296	96.91	3911	96.37	3627	97.22	96.8333	3595	98.55	3251	98.43	3240	98.55	98.51	1.22333	2.9	1.67667	nad2	318325
318326	G<->A	-	GlmaxMp31-2	nad2	NADH dehydrogenase subunit 2	yes	CDS	CCA<->TTA	P<->L	yes	1255	94.34	4681	98.27	3405	97.09	96.5667	3299	97.21	3911	97.32	3632	97.52	97.35	3590	98.39	3251	98.71	3240	98.61	98.57	0.783333	2.00333	1.22	nad2	318326
318331	G<->A	-	GlmaxMp31-2	nad2	NADH dehydrogenase subunit 2	yes	CDS	TCC<->TTC	S<->F	yes	1259	95.23	4700	97.71	3418	96.65	96.53	3307	96.83	3912	96.35	3643	97.12	96.7667	3602	97.95	3261	98.04	3251	97.67	97.8867	0.236667	1.35667	1.12	nad2	318331
318334	G<->A	-	GlmaxMp31-2	nad2	NADH dehydrogenase subunit 2	yes	CDS	TCA<->TTA	S<->L	yes	1272	92.45	4737	98.18	3469	97.32	95.9833	3347	96.57	3948	95.67	3683	96.63	96.29	3641	98.05	3310	98.31	3287	97.96	98.1067	0.306667	2.12333	1.81667	nad2	318334
318436	G<->A	-	GlmaxMp31-2	nad2	NADH dehydrogenase subunit 2	yes	CDS	GCG<->GTG	A<->V	yes	1191	96.31	1647	96.72	1435	97	96.6767	1948	97.7	2311	98.01	2253	98.1	97.9367	2149	97.59	2055	97.77	1875	97.71	97.69	1.26	1.01333	-0.246667	nad2	318436
319602	G<->A	-	GlmaxMp31-2	nad2	NADH dehydrogenase subunit 2	yes	intronic	NA	NA	NA	438	4.34	440	4.77	407	4.42	4.51	282	6.38	385	5.45	320	7.81	6.54667	344	13.08	231	17.32	253	14.62	15.0067	2.03667	10.4967	8.46	nad2	319602
319786	G<->A	-	GlmaxMp31-2	nad2	NADH dehydrogenase subunit 2	yes	intronic	NA	NA	NA	393	57.76	448	77.46	530	59.06	64.76	544	69.67	708	62.85	625	63.42	65.3133	553	78.48	421	80.05	446	73.6	77.3767	0.553333	12.6167	12.0633	nad2	319786
319804	G<->A	-	GlmaxMp31-2	nad2	NADH dehydrogenase subunit 2	yes	intronic	NA	NA	NA	388	42.78	455	42.64	550	41.82	42.4133	551	34.85	725	37.47	647	38.79	37.0367	587	30.39	443	29.95	470	30.85	30.3967	-5.37667	-12.0167	-6.64	nad2	319804
319965	G<->A	-	GlmaxMp31-2	nad2	NADH dehydrogenase subunit 2	yes	CDS	CCC<->CCT	P<->P	no	1787	86.18	1592	89.95	1965	86.46	87.53	776	88.79	896	88.06	753	88.18	88.3433	772	91.98	688	91.59	554	88.31	90.6267	0.813333	3.09667	2.28333	nad2	319965
320084	G<->A	-	GlmaxMp31-2	nad2	NADH dehydrogenase subunit 2	yes	CDS	CGG<->TGG	R<->W	yes	3242	97.78	4163	98.34	4673	97.84	97.9867	2404	96.3	2790	95.42	2550	96.2	95.9733	2615	97.56	2180	98.08	2139	97.62	97.7533	-2.01333	-0.233333	1.78	nad2	320084
320249	G<->A	-	GlmaxMp31-2	nad2	NADH dehydrogenase subunit 2	yes	CDS	CTG<->TTG	L<->L	no	3099	99.16	4640	98.94	5051	98.61	98.9033	3114	96.73	3752	96.3	3640	97.06	96.6967	3554	98.62	3004	98.34	2969	98.42	98.46	-2.20667	-0.443333	1.76333	nad2	320249
320253	G<->A	-	GlmaxMp31-2	nad2	NADH dehydrogenase subunit 2	yes	CDS	TTC<->TTT	F<->F	no	3065	99.54	4538	99.38	4971	99.26	99.3933	3094	98.51	3723	98.1	3607	98.26	98.29	3523	99.4	2973	98.92	2939	99.15	99.1567	-1.10333	-0.236667	0.866667	nad2	320253
320283	G<->A	-	GlmaxMp31-2	nad2	NADH dehydrogenase subunit 2	yes	CDS	CTC<->CTT	L<->L	no	2855	99.33	3770	98.86	4216	98.86	99.0167	2757	97.03	3332	97.18	3261	97.58	97.2633	3243	98.77	2674	98.43	2656	98.68	98.6267	-1.75333	-0.39	1.36333	nad2	320283
320291	G<->A	-	GlmaxMp31-2	nad2	NADH dehydrogenase subunit 2	yes	CDS	CTC<->TTC	L<->F	yes	2708	98.26	3385	98.85	3998	98.7	98.6033	2753	96.08	3302	97.07	3236	96.95	96.7	3261	99.05	2654	98.23	2638	98.79	98.69	-1.90333	0.0866667	1.99	nad2	320291
320402	G<->A	-	GlmaxMp31-2	nad2	NADH dehydrogenase subunit 2	yes	CDS	CTA<->TTA	L<->L	no	2266	98.9	2715	99.01	3104	98.65	98.8533	1754	98.18	2113	98.2	2083	97.51	97.9633	2087	99.04	1653	98.91	1663	98.56	98.8367	-0.89	-0.0166667	0.873333	nad2	320402
320411	G<->A	-	GlmaxMp31-2	nad2	NADH dehydrogenase subunit 2	yes	CDS	CAC<->TAC	H<->Y	yes	2326	96.39	2685	97.84	3111	96.91	97.0467	1730	96.48	2072	97.39	2025	96.05	96.64	2032	98.82	1608	98.57	1611	98.08	98.49	-0.406667	1.44333	1.85	nad2	320411
320553	G<->A	-	GlmaxMp31-2	nad2	NADH dehydrogenase subunit 2	yes	intronic	NA	NA	NA	2434	38.44	2034	32.06	2181	30.89	33.7967	1137	21.07	1420	21.6	1340	22.74	21.8033	1248	17.39	910	19.34	989	16.08	17.6033	-11.9933	-16.1933	-4.2	nad2	320553
321092	G<->A	-	GlmaxMp31-2	nad2	NADH dehydrogenase subunit 2	yes	intronic	NA	NA	NA	306	43.79	390	51.28	439	40.32	45.13	400	36.5	490	30.49	490	29.33	32.1067	535	52.15	376	47.87	392	42.75	47.59	-13.0233	2.46	15.4833	nad2	321092
322085	G<->A	-	GlmaxMp31-2	nad2	NADH dehydrogenase subunit 2	yes	intronic	NA	NA	NA	332	23.8	371	11.59	416	30.29	21.8933	278	16.19	392	18.11	350	15.43	16.5767	287	28.22	202	22.17	204	24.51	24.9667	-5.31667	3.07333	8.39	nad2	322085
323104	G<->A	-	GlmaxMp31-2	nad2	NADH dehydrogenase subunit 2	yes	CDS	TCC<->TTC	S<->F	yes	366	70.22	513	79.53	519	77.46	75.7367	421	74.88	492	76.22	475	77.89	76.33	385	85.71	293	82.25	269	84.39	84.1167	0.593333	8.38	7.78667	nad2	323104
323119	G<->A	-	GlmaxMp31-2	nad2	NADH dehydrogenase subunit 2	yes	CDS	TCT<->TTT	S<->F	yes	392	68.88	532	78.01	598	74.79	73.8933	403	58.91	484	65.08	474	69.2	64.3967	371	78.98	295	79.39	267	78.28	78.8833	-9.49667	4.99	14.4867	nad2	323119
323172	G<->A	-	GlmaxMp31-2	nad2	NADH dehydrogenase subunit 2	yes	CDS	ACC<->ACT	T<->T	no	486	59.47	587	67.63	628	63.69	63.5967	492	39.63	581	42.61	539	47.5	43.2467	404	78.22	338	72.49	302	75.83	75.5133	-20.35	11.9167	32.2667	nad2	323172
328677	C<->T	+	GlmaxMp72	atp9	ATPase subunit 9	no	CDS	TCA<->TTA	S<->L	yes	8542	99.5	8685	99.6	8638	99.54	99.5467	8196	98.93	8907	98.9	8721	98.81	98.88	8735	99.46	8712	99.34	8822	99.33	99.3767	-0.666667	-0.17	0.496667	atp9	328677
328707	C<->T	+	GlmaxMp72	atp9	ATPase subunit 9	no	CDS	TCA<->TTA	S<->L	yes	8137	99.62	8177	99.67	8177	99.57	99.62	9056	99.29	9222	99.28	9326	99.37	99.3133	9343	99.69	9361	99.74	9217	99.6	99.6767	-0.306667	0.0566667	0.363333	atp9	328707
337304	G<->A	-	GlmaxMp20-3	nad1	NADH dehydrogenase subunit 1	yes	CDS	TTC<->TTT	F<->F	no	5747	99.04	6601	99.44	6063	99.37	99.2833	4431	98.51	4828	98.7	4760	98.74	98.65	5628	99.25	5129	99.2	4397	98.89	99.1133	-0.633333	-0.17	0.463333	nad1	337304
337318	G<->A	-	GlmaxMp20-3	nad1	NADH dehydrogenase subunit 1	yes	CDS	CGT<->TGT	R<->C	yes	5976	39.03	6625	40.27	6413	35.87	38.39	4588	17.95	5024	19.85	4961	18.41	18.7367	5854	16.62	5328	16.23	4604	15.19	16.0133	-19.6533	-22.3767	-2.72333	nad1	337318
337329	G<->A	-	GlmaxMp20-3	nad1	NADH dehydrogenase subunit 1	yes	CDS	TCG<->TTG	S<->L	yes	5994	99.28	6612	99.26	6391	99.05	99.1967	4646	97.81	5134	98.46	5073	98.37	98.2133	5938	98.45	5349	98.23	4748	98.25	98.31	-0.983333	-0.886667	0.0966667	nad1	337329
337359	G<->A	-	GlmaxMp20-3	nad1	NADH dehydrogenase subunit 1	yes	CDS	CCG<->CTG	P<->L	yes	5829	98.99	5808	99.21	5868	99.15	99.1167	4633	98.36	5145	98.76	5089	98.39	98.5033	5941	98.37	5383	97.85	4759	98.17	98.13	-0.613333	-0.986667	-0.373333	nad1	337359
337434	G<->A	-	GlmaxMp20-3	nad1	NADH dehydrogenase subunit 1	yes	CDS	TCT<->TTT	S<->F	yes	5559	22.11	5748	19.33	5658	17.87	19.77	3868	18.87	4444	22.07	4525	17.18	19.3733	5419	9.36	4736	10.39	4182	8.91	9.55333	-0.396667	-10.2167	-9.82	nad1	337434
337502	G<->A	-	GlmaxMp20-3	nad1	NADH dehydrogenase subunit 1	yes	CDS	GCC<->GCT	A<->A	no	5466	90.78	6022	92.29	4788	92.09	91.72	2404	85	2705	84.63	2764	86.66	85.43	3051	92.13	2525	92.64	2451	91.68	92.15	-6.29	0.43	6.72	nad1	337502
337514	G<->A	-	GlmaxMp20-3	nad1	NADH dehydrogenase subunit 1	yes	CDS	TCC<->TCT	S<->S	no	4986	96.33	5464	97.07	4439	97.07	96.8233	1934	89.76	2272	89.57	2248	90.4	89.91	2426	95.02	2041	94.41	1994	94.49	94.64	-6.91333	-2.18333	4.73	nad1	337514
337517	G<->A	-	GlmaxMp20-3	nad1	NADH dehydrogenase subunit 1	yes	CDS	CTC<->CTT	L<->L	no	5005	96.02	5486	96.59	4463	96.48	96.3633	1939	88.87	2261	88.72	2243	89.41	89	2421	93.98	2035	94.21	1999	93.95	94.0467	-7.36333	-2.31667	5.04667	nad1	337517
337523	G<->A	-	GlmaxMp20-3	nad1	NADH dehydrogenase subunit 1	yes	CDS	ATC<->ATT	I<->I	no	4963	92.85	5367	94.37	4373	94.24	93.82	1897	89.26	2237	87.53	2214	89.53	88.7733	2356	91.74	1971	92.5	1962	92.77	92.3367	-5.04667	-1.48333	3.56333	nad1	337523
337532	G<->A	-	GlmaxMp20-3	nad1	NADH dehydrogenase subunit 1	yes	CDS	TCC<->TCT	S<->S	no	4160	95.34	4506	96.89	3651	96.44	96.2233	1716	93.36	1983	92.99	1981	94.04	93.4633	2013	95.44	1733	95.22	1716	95.4	95.3533	-2.76	-0.87	1.89	nad1	337532
337546	G<->A	-	GlmaxMp20-3	nad1	NADH dehydrogenase subunit 1	yes	intronic	NA	NA	NA	4242	96.49	4050	97.48	3045	96.45	96.8067	1664	95.97	1930	94.92	1970	96.4	95.7633	1920	97.14	1627	96.99	1609	96.34	96.8233	-1.04333	0.0166667	1.06	nad1	337546
338025	G<->A	-	GlmaxMp20-3	nad1	NADH dehydrogenase subunit 1	yes	intronic	NA	NA	NA	1536	75.39	2324	75.65	2145	70.87	73.97	1202	44.77	1460	45.17	1367	53.36	47.7667	1415	50.95	1137	49.87	1111	48.43	49.75	-26.2033	-24.22	1.98333	nad1	338025
338186	G<->A	-	GlmaxMp73	matR	maturase	no	CDS	GTC<->GTT	V<->V	no	2112	41.29	2292	38.57	2065	36.42	38.76	1139	31.76	1355	32.89	1369	33.33	32.66	1843	40.18	1584	44.35	1531	40.42	41.65	-6.1	2.89	8.99	matR	338186
338196	G<->A	-	GlmaxMp73	matR	maturase	no	CDS	TCA<->TTA	S<->L	yes	2075	95.91	2291	96.73	2024	94.86	95.8333	1091	90.1	1320	91.82	1306	90.06	90.66	1776	97.64	1528	97.45	1476	96.55	97.2133	-5.17333	1.38	6.55333	matR	338196
338214	G<->A	-	GlmaxMp73	matR	maturase	no	CDS	CCC<->CTC	P<->L	yes	2105	70.07	2286	71.26	2070	70.72	70.6833	1190	71.48	1441	74.05	1421	71.77	72.4333	1921	83.2	1614	83.74	1603	82.33	83.09	1.75	12.4067	10.6567	matR	338214
338284	G<->A	-	GlmaxMp73	matR	maturase	no	CDS	CAC<->TAC	H<->Y	yes	2966	87.46	2914	88.88	2473	87.27	87.87	1220	75.49	1437	78.43	1413	80.13	78.0167	2006	93.43	1685	93	1697	92.81	93.08	-9.85333	5.21	15.0633	matR	338284
338306	G<->A	-	GlmaxMp73	matR	maturase	no	CDS	TAC<->TAT	Y<->Y	no	2833	94.95	2786	95.05	2283	94.74	94.9133	1165	92.88	1422	93.61	1351	92.6	93.03	1875	97.98	1498	96.74	1601	96.88	97.2	-1.88333	2.28667	4.17	matR	338306
338320	G<->A	-	GlmaxMp73	matR	maturase	no	CDS	CGC<->TGT	R<->C	yes	2892	66.87	2789	69.5	2374	71.52	69.2967	1106	52.71	1294	57.11	1242	54.99	54.9367	1720	81.22	1325	78.34	1468	81.22	80.26	-14.36	10.9633	25.3233	matR	338320
338340	G<->A	-	GlmaxMp73	matR	maturase	no	CDS	CCT<->CTT	P<->L	yes	2617	83.87	2491	84.79	2054	83.89	84.1833	1113	66.85	1273	66.72	1217	70.41	67.9933	1712	91.37	1313	91.01	1449	90.14	90.84	-16.19	6.65667	22.8467	matR	338340
338361	G<->A	-	GlmaxMp73	matR	maturase	no	CDS	TCT<->TTT	S<->F	yes	2645	87.03	2576	88.82	2136	86.42	87.4233	1098	78.78	1179	77.1	1131	80.85	78.91	1633	93.08	1258	90.62	1407	90.77	91.49	-8.51333	4.06667	12.58	matR	338361
338495	G<->A	-	GlmaxMp73	matR	maturase	no	CDS	CCC<->CCT	P<->P	no	916	22.11	959	15.31	1021	21.94	19.7867	761	21.52	854	19.56	755	23.94	21.6733	1134	42.15	858	43.19	957	40.25	41.8633	1.88667	22.0767	20.19	matR	338495
338976	G<->A	-	GlmaxMp73	matR	maturase	no	CDS	CCC<->CTC	P<->L	yes	663	59.43	746	62.6	869	61.33	61.12	626	45.69	756	53.04	709	41.04	46.59	1009	78.71	851	75.47	829	75.54	76.5733	-14.53	15.4533	29.9833	matR	338976
339126	G<->A	-	GlmaxMp73	matR	maturase	no	CDS	GCC<->GTC	A<->V	yes	424	21.93	487	21.56	674	13.48	18.99	542	12.92	639	12.68	515	13.18	12.9267	761	16.67	568	15.14	608	19.05	16.9533	-6.06333	-2.03667	4.02667	matR	339126
339633	G<->A	-	GlmaxMp73	matR	maturase	no	CDS	TCG<->TTG	S<->L	yes	583	66.04	518	62.36	686	61.37	63.2567	555	44.96	605	49.09	598	50.75	48.2667	720	84.03	539	83.73	585	83.5	83.7533	-14.99	20.4967	35.4867	matR	339633
339711	G<->A	-	GlmaxMp73	matR	maturase	no	CDS	CCA<->CTA	P<->L	yes	528	71.97	536	76.68	677	74.74	74.4633	628	67.41	662	68.48	658	70.06	68.65	748	76.47	562	77.4	571	70.8	74.89	-5.81333	0.426667	6.24	matR	339711
339801	G<->A	-	GlmaxMp73	matR	maturase	no	CDS	TCC<->TTT	S<->F	yes	785	67.3	674	67.36	793	71.03	68.5633	777	78.89	920	80.13	837	82.98	80.6667	1207	94.28	915	92.91	935	90.39	92.5267	12.1033	23.9633	11.86	matR	339801
339844	G<->A	-	GlmaxMp73	matR	maturase	no	CDS	CCA<->TCA	P<->S	yes	719	73.16	696	77.73	840	79.64	76.8433	790	79.29	934	76.68	875	81.25	79.0733	1246	94.64	953	91.86	990	88.8	91.7667	2.23	14.9233	12.6933	matR	339844
339890	G<->A	-	GlmaxMp73	matR	maturase	no	CDS	TTC<->TTT	F<->F	no	818	9.17	811	13.69	996	16.37	13.0767	945	10.77	1071	10.99	984	14.99	12.25	1527	26.36	1113	25.88	1164	25.32	25.8533	-0.826667	12.7767	13.6033	matR	339890
340005	G<->A	-	GlmaxMp73	matR	maturase	no	CDS	TCC<->TTC	S<->F	yes	476	62.39	612	70.92	761	68.33	67.2133	640	71.41	792	69.77	684	75.29	72.1567	1017	91.15	785	85.35	745	87.65	88.05	4.94333	20.8367	15.8933	matR	340005
340080	G<->A	-	GlmaxMp20-3	nad1	NADH dehydrogenase subunit 1	yes	intronic	NA	NA	NA	340	54.12	373	64.53	428	56.54	58.3967	655	61.04	812	61.75	736	63.06	61.95	961	79.21	737	75.98	748	76.64	77.2767	3.55333	18.88	15.3267	nad1	340080
352737	G<->A	-	GlmaxMp76	cox2	cytochrome c oxidase subunit 2	no	CDS	ACG<->ATG	T<->M	yes	263	11.41	124	20.97	325	17.23	16.5367	135	32.59	139	10.07	134	8.21	16.9567	145	17.93	163	18.4	153	15.03	17.12	0.42	0.583333	0.163333	cox2	352737
352801	G<->A	-	GlmaxMp76	cox2	cytochrome c oxidase subunit 2	no	CDS	CGG<->TGG	R<->W	yes	206	16.5	173	23.56	324	22.22	20.76	151	35.1	158	13.29	160	18.12	22.17	161	26.22	179	24.02	189	19.05	23.0967	1.41	2.33667	0.926667	cox2	352801
352927	G<->A	-	GlmaxMp76	cox2	cytochrome c oxidase subunit 2	no	CDS	CGG<->TGG	R<->W	yes	254	11.42	251	19.12	382	18.32	16.2867	145	31.03	182	10.44	175	21.71	21.06	191	15.71	171	11.11	206	11.65	12.8233	4.77333	-3.46333	-8.23667	cox2	352927
353017	G<->A	-	GlmaxMp76	cox2	cytochrome c oxidase subunit 2	no	CDS	CGG<->TGG	R<->W	yes	237	16.46	230	11.3	319	19.44	15.7333	138	23.19	177	10.17	159	9.43	14.2633	168	18.45	159	14.47	191	15.18	16.0333	-1.47	0.3	1.77	cox2	353017
353019	G<->A	-	GlmaxMp76	cox2	cytochrome c oxidase subunit 2	no	CDS	TCA<->TTA	S<->L	yes	227	7.05	231	3.9	314	14.65	8.53333	137	17.52	170	7.65	154	3.9	9.69	161	23.6	155	15.48	190	17.89	18.99	1.15667	10.4567	9.3	cox2	353019
355497	C<->T	+	GlmaxMp78	atp1-3	ATPase subunit 1	no	CDS	ACC<->ACT	T<->T	no	4674	36.29	4412	38.42	6045	37.64	37.45	3893	21.34	4169	20.07	3917	19.68	20.3633	4531	16.34	3835	15	3440	18.15	16.4967	-17.0867	-20.9533	-3.86667	atp1-3	355497
356280	C<->T	+	GlmaxMp78	atp1-3	ATPase subunit 1	no	CDS	ACC<->ACT	T<->T	no	2304	59.9	2664	55.26	3170	52.59	55.9167	1805	28.78	2175	26.94	2192	27.53	27.75	2617	29.72	2026	32.35	2075	30.28	30.7833	-28.1667	-25.1333	3.03333	atp1-3	356280
361737	G<->A	-	GlmaxMp80	atp6-2	ATPase subunit 6	no	CDS	CAA<->TAA	Q<->U	yes	1643	95.13	7389	97.67	5640	96.68	96.4933	3453	94.65	4222	95.2	4210	95.26	95.0367	3677	96.96	3609	96.46	3475	96.84	96.7533	-1.45667	0.26	1.71667	atp6-2	361737
361775	G<->A	-	GlmaxMp80	atp6-2	ATPase subunit 6	no	CDS	TCA<->TTA	S<->L	yes	2290	93.45	7938	97.9	7465	96	95.7833	4450	94.39	5416	94.3	5453	94.98	94.5567	4665	97.66	4534	97.67	4439	97.68	97.67	-1.22667	1.88667	3.11333	atp6-2	361775
361784	G<->A	-	GlmaxMp80	atp6-2	ATPase subunit 6	no	CDS	TCT<->TTT	S<->F	yes	2431	93.34	7936	97.43	7466	95.42	95.3967	4726	93.26	5717	93.48	5716	94.3	93.68	4901	95.33	4750	95.88	4668	96.57	95.9267	-1.71667	0.53	2.24667	atp6-2	361784
361791	G<->A	-	GlmaxMp80	atp6-2	ATPase subunit 6	no	CDS	CAT<->TAT	H<->Y	yes	2529	95.02	7964	98.51	7484	97.19	96.9067	4755	95.34	5745	94.99	5760	96.08	95.47	4925	97.61	4777	97.89	4682	98.12	97.8733	-1.43667	0.966667	2.40333	atp6-2	361791
361799	G<->A	-	GlmaxMp80	atp6-2	ATPase subunit 6	no	CDS	TCA<->TTA	S<->L	yes	2664	95.95	7936	98.93	7442	97.86	97.58	4941	95.61	5989	95.65	6000	96.23	95.83	5112	97.65	4944	97.88	4888	98.3	97.9433	-1.75	0.363333	2.11333	atp6-2	361799
361820	G<->A	-	GlmaxMp80	atp6-2	ATPase subunit 6	no	CDS	CCG<->CTG	P<->L	yes	3543	93.91	7897	98.47	7427	96.74	96.3733	5419	93.88	6311	93.76	6355	94.02	93.8867	5700	96.02	5422	96.07	5545	96.63	96.24	-2.48667	-0.133333	2.35333	atp6-2	361820
361907	G<->A	-	GlmaxMp80	atp6-2	ATPase subunit 6	no	CDS	TCC<->TTC	S<->F	yes	6075	93.07	8510	96.75	7638	95.51	95.11	5030	90.56	5571	90.51	5657	91.02	90.6967	5386	95.58	5236	96.28	5137	95.68	95.8467	-4.41333	0.736667	5.15	atp6-2	361907
361928	G<->A	-	GlmaxMp80	atp6-2	ATPase subunit 6	no	CDS	TCA<->TTA	S<->L	yes	7594	96.88	8514	98.91	8486	97.88	97.89	4571	94.84	5230	94.59	5292	94.75	94.7267	5011	97.41	4922	97.58	4795	97.46	97.4833	-3.16333	-0.406667	2.75667	atp6-2	361928
361970	G<->A	-	GlmaxMp80	atp6-2	ATPase subunit 6	no	CDS	TCA<->TTA	S<->L	yes	6906	91.2	8619	96.08	8560	94.32	93.8667	3774	92.7	4856	92.31	4800	92.65	92.5533	4253	93.96	4149	92.8	4136	94.44	93.7333	-1.31333	-0.133333	1.18	atp6-2	361970
361992	G<->A	-	GlmaxMp80	atp6-2	ATPase subunit 6	no	CDS	CAT<->TAT	H<->Y	yes	8055	92.89	8425	96.67	8524	94.66	94.74	4067	89.95	5341	89.4	5250	89.72	89.69	4593	94.54	4422	93.94	4538	94.65	94.3767	-5.05	-0.363333	4.68667	atp6-2	361992
361995	G<->A	-	GlmaxMp80	atp6-2	ATPase subunit 6	no	CDS	CCT<->TCT	P<->S	yes	8020	93.56	8375	96.92	8422	95.14	95.2067	4067	89.33	5344	89.32	5260	89.49	89.38	4600	93.22	4419	93.08	4527	93.82	93.3733	-5.82667	-1.83333	3.99333	atp6-2	361995
362054	G<->A	-	GlmaxMp80	atp6-2	ATPase subunit 6	no	CDS	TCA<->TTA	S<->L	yes	6754	93.23	8008	97.23	7104	95.75	95.4033	4773	91.16	6386	90.26	6185	91.11	90.8433	5496	95.07	5159	95.14	5375	95.7	95.3033	-4.56	-0.1	4.46	atp6-2	362054
362185	G<->A	-	GlmaxMp80	atp6-2	ATPase subunit 6	no	CDS	CCC<->CCT	P<->P	no	7561	74.83	6681	75.35	7515	72.92	74.3667	5041	63.95	6489	66.43	6633	64.05	64.81	5600	62.69	5300	66.5	5469	63.9	64.3633	-9.55667	-10.0033	-0.446667	atp6-2	362185
362186	G<->A	-	GlmaxMp80	atp6-2	ATPase subunit 6	no	CDS	CCC<->CTT	P<->L	yes	7549	91.05	6541	97.11	7411	94.51	94.2233	5010	86.77	6462	85.56	6598	86.5	86.2767	5565	92.71	5270	92.57	5430	92.85	92.71	-7.94667	-1.51333	6.43333	atp6-2	362186
362201	G<->A	-	GlmaxMp80	atp6-2	ATPase subunit 6	no	CDS	TCG<->TTG	S<->L	yes	7593	91.43	7479	96.54	7871	94.5	94.1567	4827	90.77	6243	90.79	6370	91.52	91.0267	5392	94.16	5069	93.48	5213	93.78	93.8067	-3.13	-0.35	2.78	atp6-2	362201
362219	G<->A	-	GlmaxMp80	atp6-2	ATPase subunit 6	no	CDS	TCG<->TTG	S<->L	yes	7492	94.11	7911	98.33	7810	95.99	96.1433	4875	92.55	6158	91.94	6368	92.45	92.3133	5368	93.1	5116	91.72	5255	92.87	92.5633	-3.83	-3.58	0.25	atp6-2	362219
362279	G<->A	-	GlmaxMp80	atp6-2	ATPase subunit 6	no	CDS	CCG<->CTG	P<->L	yes	7412	93.44	8239	97.77	8204	95.37	95.5267	4789	91.03	5837	90.74	6031	90.34	90.7033	5180	95.12	5095	94.39	5029	95.01	94.84	-4.82333	-0.686667	4.13667	atp6-2	362279
362407	G<->A	-	GlmaxMp80	atp6-2	ATPase subunit 6	no	CDS	CCC<->CCT	P<->P	no	6094	29.46	7589	26.78	7486	26.17	27.47	4261	17.48	5262	19.9	5295	19.76	19.0467	4809	16.52	4632	16.21	4744	17.12	16.6167	-8.42333	-10.8533	-2.43	atp6-2	362407
362409	G<->A	-	GlmaxMp80	atp6-2	ATPase subunit 6	no	CDS	CCC<->TCT	P<->S	yes	6027	95.37	7551	97.82	7491	96.58	96.59	4205	93.25	5219	92.44	5242	92.84	92.8433	4773	96.53	4589	96.38	4696	95.92	96.2767	-3.74667	-0.313333	3.43333	atp6-2	362409
375492	G<->A	-	GlmaxMp82	atp8	ATPase subunit 8	no	CDS	CCA<->CTA	P<->L	yes	8261	99.33	7639	99.78	7637	99.4	99.5033	8774	99.32	9383	99.33	9001	99.35	99.3333	9203	99.83	9309	99.71	8896	99.66	99.7333	-0.17	0.23	0.4	atp8	375492
375512	G<->A	-	GlmaxMp82	atp8	ATPase subunit 8	no	CDS	TAC<->TAT	Y<->Y	no	8254	49.68	7628	51.66	7646	46.56	49.3	8774	49.14	9383	50.94	9008	48.44	49.5067	9218	30.07	9312	30.94	8901	30.36	30.4567	0.206667	-18.8433	-19.05	atp8	375512
375527	G<->A	-	GlmaxMp82	atp8	ATPase subunit 8	no	CDS	ATC<->ATT	I<->I	no	8203	15.72	7568	17.31	7578	15.84	16.29	8773	13.15	9387	14.06	9015	13.58	13.5967	9213	13.51	9318	13.49	8910	15.03	14.01	-2.69333	-2.28	0.413333	atp8	375527
375870	G<->A	-	GlmaxMp82	atp8	ATPase subunit 8	no	CDS	CCC<->CTT	P<->L	yes	7880	96.68	7814	97.53	7990	97.52	97.2433	5551	94.49	5422	94.75	5518	94.88	94.7067	5872	96.85	5924	96.46	5709	96.8	96.7033	-2.53667	-0.54	1.99667	atp8	375870
375871	G<->A	-	GlmaxMp82	atp8	ATPase subunit 8	no	CDS	CCC<->TTT	P<->F	yes	7887	93.01	7843	93.64	7990	93.18	93.2767	5553	87.86	5436	88.78	5528	90.46	89.0333	5885	92.03	5926	91.86	5709	92.25	92.0467	-4.24333	-1.23	3.01333	atp8	375871
375889	G<->A	-	GlmaxMp82	atp8	ATPase subunit 8	no	CDS	CTC<->TTC	L<->F	yes	7486	98.36	7238	99.07	7229	99.41	98.9467	5315	99.04	5218	98.85	5328	99.1	98.9967	5663	99.33	5659	99.19	5517	99.28	99.2667	0.05	0.32	0.27	atp8	375889
375900	G<->A	-	GlmaxMp82	atp8	ATPase subunit 8	no	CDS	TCA<->TTA	S<->L	yes	7595	92.36	8110	94.65	7363	94.73	93.9133	5466	90.24	6034	89.43	6010	89.84	89.8367	5895	89.44	5785	89.38	5810	90.41	89.7433	-4.07667	-4.17	-0.0933333	atp8	375900
375917	G<->A	-	GlmaxMp82	atp8	ATPase subunit 8	no	CDS	TTC<->TTT	F<->F	no	7025	77.65	8440	78.88	8113	75.15	77.2267	5666	77.7	6735	78.36	6738	78.9	78.32	6738	74.69	6202	74.69	6543	75.3	74.8933	1.09333	-2.33333	-3.42667	atp8	375917
401004	C<->T	+	GlmaxMp88	mttB	transport membrane protein	no	CDS	CGG<->TGG	R<->W	yes	881	86.04	812	91.88	1053	85.94	87.9533	699	80.83	870	85.17	706	83.71	83.2367	698	85.26	638	86.7	517	84.33	85.43	-4.71667	-2.52333	2.19333	mttB	401004
401040	C<->T	+	GlmaxMp88	mttB	transport membrane protein	no	CDS	CGT<->TGT	R<->C	yes	868	82.95	1018	91.06	1242	86.23	86.7467	788	88.47	961	90.54	775	88.9	89.3033	763	94.36	694	93.23	568	91.37	92.9867	2.55667	6.24	3.68333	mttB	401040
401051	C<->T	+	GlmaxMp88	mttB	transport membrane protein	no	CDS	TTC<->TTT	F<->F	no	864	17.48	1064	23.57	1273	19.17	20.0733	788	9.63	965	11.81	787	12.33	11.2567	765	16.47	697	15.64	557	15.62	15.91	-8.81667	-4.16333	4.65333	mttB	401051
401052	C<->T	+	GlmaxMp88	mttB	transport membrane protein	no	CDS	CCG<->TCG	P<->S	yes	855	82.34	1062	91.43	1274	84.77	86.18	788	74.62	953	79.43	781	78.36	77.47	765	87.19	695	83.74	556	84.53	85.1533	-8.71	-1.02667	7.68333	mttB	401052
401068	C<->T	+	GlmaxMp88	mttB	transport membrane protein	no	CDS	TCT<->TTT	S<->F	yes	866	84.41	1066	93.06	1275	86.75	88.0733	758	87.2	923	87.87	768	88.54	87.87	762	92.01	676	93.51	564	89.18	91.5667	-0.203333	3.49333	3.69667	mttB	401068
401071	C<->T	+	GlmaxMp88	mttB	transport membrane protein	no	CDS	CCA<->TTA	P<->L	yes	865	79.65	1069	89.71	1279	82.17	83.8433	763	77.06	924	79.91	775	80	78.99	765	83.27	677	83.31	565	81.24	82.6067	-4.85333	-1.23667	3.61667	mttB	401071
401084	C<->T	+	GlmaxMp88	mttB	transport membrane protein	no	CDS	CCC<->CTT	P<->L	yes	910	20.88	1222	28.31	1416	19.77	22.9867	753	4.91	928	7.42	787	5.45	5.92667	759	1.58	667	2.85	570	2.45	2.29333	-17.06	-20.6933	-3.63333	mttB	401084
401128	C<->T	+	GlmaxMp88	mttB	transport membrane protein	no	CDS	TCA<->TTA	S<->L	yes	889	86.5	1160	95.34	1385	91.77	91.2033	763	89.27	935	87.81	806	89.21	88.7633	775	92.65	692	93.5	597	87.63	91.26	-2.44	0.0566667	2.49667	mttB	401128
401140	C<->T	+	GlmaxMp88	mttB	transport membrane protein	no	CDS	TCC<->TTC	S<->F	yes	823	81.53	1115	92.03	1363	89.66	87.74	737	87.92	906	85.34	761	85.81	86.3567	770	91.18	707	92.22	570	87.72	90.3733	-1.38333	2.63333	4.01667	mttB	401140
401142	C<->T	+	GlmaxMp88	mttB	transport membrane protein	no	CDS	CCG<->TCG	P<->S	yes	837	75.51	1118	89.62	1368	83.55	82.8933	737	77.67	910	77.3	763	77.2	77.39	770	87.14	709	86.74	571	84.62	86.1667	-5.50333	3.27333	8.77667	mttB	401142
401192	C<->T	+	GlmaxMp88	mttB	transport membrane protein	no	CDS	CCC<->CTT	P<->L	yes	860	28.84	1033	35.82	1258	27.66	30.7733	557	17.74	677	15.51	567	16.14	16.4633	526	15.59	528	16.86	433	20.55	17.6667	-14.31	-13.1067	1.20333	mttB	401192
401202	C<->T	+	GlmaxMp88	mttB	transport membrane protein	no	CDS	CAT<->TAT	H<->Y	yes	867	90.31	1030	96.02	1241	92.11	92.8133	580	90.52	697	86.08	572	89.18	88.5933	544	94.31	557	92.1	440	88.46	91.6233	-4.22	-1.19	3.03	mttB	401202
401268	C<->T	+	GlmaxMp88	mttB	transport membrane protein	no	CDS	CTC<->TTC	L<->F	yes	1116	90.59	1189	95.54	1342	90.31	92.1467	590	87.99	740	87.31	596	88.8	88.0333	601	90.7	550	90.18	486	89.09	89.99	-4.11333	-2.15667	1.95667	mttB	401268
401284	C<->T	+	GlmaxMp88	mttB	transport membrane protein	no	CDS	TCT<->TTT	S<->F	yes	1171	86.42	1322	94.1	1497	89.99	90.17	595	87.23	784	84.2	603	86.24	85.89	585	83.62	568	80.28	481	79.63	81.1767	-4.28	-8.99333	-4.71333	mttB	401284
401286	C<->T	+	GlmaxMp88	mttB	transport membrane protein	no	CDS	CGC<->TGC	R<->C	yes	1185	89.79	1331	95.42	1506	92.1	92.4367	596	90.1	785	87.02	609	88.51	88.5433	584	91.61	568	91.9	482	90.66	91.39	-3.89333	-1.04667	2.84667	mttB	401286
401293	C<->T	+	GlmaxMp88	mttB	transport membrane protein	no	CDS	TCC<->TTC	S<->F	yes	1183	83.35	1361	91.7	1564	87.02	87.3567	612	84.34	803	80.85	617	82.82	82.67	596	87.58	583	84.91	485	86.42	86.3033	-4.68667	-1.05333	3.63333	mttB	401293
401294	C<->T	+	GlmaxMp88	mttB	transport membrane protein	no	CDS	TCC<->TTT	S<->F	yes	1190	19.5	1387	24.22	1573	23.39	22.37	614	12.99	804	11.8	619	11.95	12.2467	601	18.3	584	17.78	485	14.4	16.8267	-10.1233	-5.54333	4.58	mttB	401294
401313	C<->T	+	GlmaxMp88	mttB	transport membrane protein	no	CDS	CTT<->TTT	L<->F	yes	1076	78.53	1331	92.41	1505	86.32	85.7533	614	77.2	798	75.22	606	76.57	76.33	610	78.69	551	79.67	470	82.13	80.1633	-9.42333	-5.59	3.83333	mttB	401313
401316	C<->T	+	GlmaxMp88	mttB	transport membrane protein	no	CDS	CCC<->TCC	P<->S	yes	1073	85.93	1338	93.65	1497	90.51	90.03	619	76.9	799	77.12	598	78.43	77.4833	606	82.18	540	83.73	469	84.22	83.3767	-12.5467	-6.65333	5.89333	mttB	401316
401319	C<->T	+	GlmaxMp88	mttB	transport membrane protein	no	CDS	CGG<->TGG	R<->W	yes	1072	75	1341	88.52	1492	82.77	82.0967	648	64.35	822	64.6	634	62.3	63.75	624	71.31	563	70.34	488	72.54	71.3967	-18.3467	-10.7	7.64667	mttB	401319
401377	C<->T	+	GlmaxMp88	mttB	transport membrane protein	no	CDS	TCG<->TTG	S<->L	yes	982	86.88	1639	95.73	1781	91.41	91.34	900	88.78	1079	86.1	933	88.34	87.74	851	92.24	784	91.96	689	89.84	91.3467	-3.6	0.00666667	3.60667	mttB	401377
401381	C<->T	+	GlmaxMp88	mttB	transport membrane protein	no	CDS	CTC<->CTT	L<->L	no	1014	24.56	1680	24.88	1815	21.43	23.6233	917	8.18	1105	10.13	955	10.79	9.7	887	4.4	810	6.54	712	6.6	5.84667	-13.9233	-17.7767	-3.85333	mttB	401381
401412	C<->T	+	GlmaxMp88	mttB	transport membrane protein	no	CDS	CAT<->TAT	H<->Y	yes	1032	90.12	1653	97.7	1785	95.41	94.41	957	94.67	1137	94.03	1015	94.69	94.4633	957	97.39	856	95.22	733	94.41	95.6733	0.0533333	1.26333	1.21	mttB	401412
401437	C<->T	+	GlmaxMp88	mttB	transport membrane protein	no	CDS	TCG<->TTG	S<->L	yes	1096	86.13	1608	95.96	1729	90.92	91.0033	898	87.43	1102	86.22	1037	87.37	87.0067	942	81	853	77.73	718	78.86	79.1967	-3.99667	-11.8067	-7.81	mttB	401437
401445	C<->T	+	GlmaxMp88	mttB	transport membrane protein	no	CDS	CCA<->TCA	P<->S	yes	1147	85.96	1626	96.13	1735	90.55	90.88	877	83.83	1058	84.4	1020	84.71	84.3133	903	84.16	826	84.38	696	82.9	83.8133	-6.56667	-7.06667	-0.5	mttB	401445
401488	C<->T	+	GlmaxMp88	mttB	transport membrane protein	no	CDS	CCA<->CTA	P<->L	yes	1349	58.78	1872	81.73	1942	78.58	73.03	945	68.78	1164	69.24	1082	70.15	69.39	1002	82.73	886	78.78	775	80.77	80.76	-3.64	7.73	11.37	mttB	401488
401494	C<->T	+	GlmaxMp88	mttB	transport membrane protein	no	CDS	CCA<->CTA	P<->L	yes	1323	79.67	1823	91.72	1836	87.58	86.3233	951	80.02	1161	78.9	1090	81.14	80.02	1008	86.9	895	84.69	795	86.68	86.09	-6.30333	-0.233333	6.07	mttB	401494
401550	C<->T	+	GlmaxMp88	mttB	transport membrane protein	no	CDS	CCG<->TCG	P<->S	yes	1450	87.52	1801	96.67	1698	91.4	91.8633	1050	88	1334	89.43	1262	89.3	88.91	1145	91.18	1143	90.46	947	89.97	90.5367	-2.95333	-1.32667	1.62667	mttB	401550
401556	C<->T	+	GlmaxMp88	mttB	transport membrane protein	no	CDS	CTC<->TTC	L<->F	yes	1504	82.85	1896	91.88	1755	84.67	86.4667	1092	79.49	1388	80.19	1307	78.75	79.4767	1211	81.83	1184	82.53	991	78.71	81.0233	-6.99	-5.44333	1.54667	mttB	401556
401600	C<->T	+	GlmaxMp88	mttB	transport membrane protein	no	CDS	ATC<->ATT	I<->I	no	1430	88.75	1561	96.22	1387	90.63	91.8667	955	91.74	1144	91.96	1063	91.25	91.65	960	93.23	998	93.59	847	91.63	92.8167	-0.216667	0.95	1.16667	mttB	401600
401607	C<->T	+	GlmaxMp88	mttB	transport membrane protein	no	CDS	CGT<->TGT	R<->C	yes	1339	85.74	1415	94.77	1303	85.5	88.67	808	82.92	1000	84.42	928	81.68	83.0067	847	89.37	833	89.08	728	89.01	89.1533	-5.66333	0.483333	6.14667	mttB	401607
401612	C<->T	+	GlmaxMp88	mttB	transport membrane protein	no	CDS	TTC<->TTT	F<->F	no	1383	80.55	1508	87.07	1351	79.13	82.25	806	69.48	1018	69.09	930	70.11	69.56	861	79.21	861	79.81	764	82.59	80.5367	-12.69	-1.71333	10.9767	mttB	401612
401623	C<->T	+	GlmaxMp88	mttB	transport membrane protein	no	CDS	TCG<->TTG	S<->L	yes	1454	86.8	1553	93.69	1357	88.65	89.7133	801	83.77	986	85.09	927	82.76	83.8733	849	80.68	858	79.6	761	79.89	80.0567	-5.84	-9.65667	-3.81667	mttB	401623
401653	C<->T	+	GlmaxMp88	mttB	transport membrane protein	no	CDS	TCG<->TTG	S<->L	yes	1484	92.25	1521	97.17	1295	93.67	94.3633	778	93.57	958	94.36	883	91.4	93.11	856	95.56	853	95.32	772	94.56	95.1467	-1.25333	0.783333	2.03667	mttB	401653
The degrees of RNA editing between the three samples were compared in columns AG, AH, AI. The percentage of RNA editing was calculated from the RNA-seq data (Percentage = reads (T) / [reads (T)+reads(C)]

## Sheet: Table S3
Table S3. Differentially edited RNA editing sites.										N-UR	N-SR	SR-UR
Gene	Position	Gene name	Gene description	Amino acid change	N - UR	N - SR	SR - UR		Up	34	23	2
									Down	21	4	24
GlmaxMp01	2129	ccmC	cytochrome c biogenesis C	No (I)	-25.4567	-10.59	-14.8667
GlmaxMp07	19631	rp15	ribosomal protein subunit L5	P<->L	-29.78	-19.23	-10.55		1. Root has higher editing degrees in atp1-1, atp1-2, atp1-3 and atp1-4 than the other two samples. However, all these sites are non-synonymous.
GlmaxMp07	19634	rp15	ribosomal protein subunit L5	P<->L	-24.2067	-14.9467	-9.26		2. MatR are more edited in nodule samples at several sites.
GlmaxMp09	21016	cob	apocytochrome b	S<->L	-14.39	-25.09	10.7		3. There are 29 differentially edited sites on nad transcripts (nad1, nad2, nad4, nad4L, nad5 and nad7). Most of these sites are intronic (11 sites) or non-synonymous (9 sites). Only 6 and 3 sites on nad1 and nad4 could lead to a.a. substitutions.
GlmaxMp16	43552	rps12	ribosomal protein S12	S<->L	7.47	19.4233	-11.9533		4. There are 18 differentially edited sites on ribosomal protein transcripts (rpl5, rps1, rps4, rps10 and rps12). Only 1 sites is intronic (rps10). All the other sites lead to a.a. substitutions.
GlmaxMp17	45792	atp4	ATPase subunit 4	No (T)	-12.26	7.24	-19.5		5. Among the 18 differentially edited sites on ribosomal protein transcripts, the editing degrees of 16 sites on rps 1, 4, 10 and 12 transcripts are higher in the nodule samples. Only 2 sites on rpl5 have lower editing degrees in the nodule samples.
GlmaxMp18	47511	rps10	ribosomal protein S10	intronic	22.9333	23.3367	-0.403333
GlmaxMp20-2	55250	nad1	NADH dehydrogenase subunit 1	P<->S	23.6833	14.4033	9.28
GlmaxMp20-2	55252	nad1	NADH dehydrogenase subunit 1	P<->F	17.2833	18.5833	-1.3
GlmaxMp20-2	55253	nad1	NADH dehydrogenase subunit 1	R<->C	24.6167	11.5933	13.0233
GlmaxMp20-2	55297	nad1	NADH dehydrogenase subunit 1	S<->F	-7.20333	14.7567	-21.96
GlmaxMp20-2	55395	nad1	NADH dehydrogenase subunit 1	S<->L	11.19	20.8733	-9.68333
GlmaxMp21	57679	ccmFc	cytochrome c biogenesis FC	P<->F	-13.8	13.0733	-26.8733
GlmaxMp21	58114	ccmFc	cytochrome c biogenesis FC	No (I)	24.13	17.3467	6.78333
GlmaxMp21	62704	ccmFc	cytochrome c biogenesis FC	R<->W	3.12333	15.7967	-12.6733
GlmaxMp21	62729	ccmFc	cytochrome c biogenesis FC	S<->L	4.45667	15.1033	-10.6467
GlmaxMp28	94089	nad4	NADH dehydrogenase subunit 4	No (T)	-16.7333	9.42667	-26.16
GlmaxMp28	94094	nad4	NADH dehydrogenase subunit 4	R<->W	-7.05	10.17	-17.22
GlmaxMp28	94132	nad4	NADH dehydrogenase subunit 4	intronic	21.5067	7.71	13.7967
GlmaxMp28	96723	nad4	NADH dehydrogenase subunit 4	No (F)	-4.3	11.6767	-15.9767
GlmaxMp28	102195	nad4	NADH dehydrogenase subunit 4	intronic	28.8467	43.8767	-15.03
GlmaxMp28	102357	nad4	NADH dehydrogenase subunit 4	No (S)	15.69	12.2833	3.40667
GlmaxMp28	102361	nad4	NADH dehydrogenase subunit 4	S<->F	16.31	9.88333	6.42667
GlmaxMp28	102491	nad4	NADH dehydrogenase subunit 4	P<->S	-16.1033	-3.35667	-12.7467
GlmaxMp32	145925	nad4L-1	NADH dehydrogenase subunit 4L	No (S)	-12.2667	5.58	-17.8467
GlmaxMp38	170051	nad7	NADH dehydrogenase subunit 7	No (F)	-24.3	-15.22	-9.08
GlmaxMp38	171046	nad7	NADH dehydrogenase subunit 7	intronic	20.94	3.36667	17.5733
GlmaxMp38	172669	nad7	NADH dehydrogenase subunit 7	No (F)	18.87	17.2833	1.58667
GlmaxMp38	176288	nad7	NADH dehydrogenase subunit 7	No (S)	-16.7667	5.67667	-22.4433
GlmaxMp39	176843	atp1-1	ATPase subunit 1	No (T)	-21.0267	-4.46	-16.5667
GlmaxMp39	177626	atp1-1	ATPase subunit 1	No (T)	-24.7833	1.32	-26.1033
GlmaxMp46	206039	nad4L-2	NADH dehydrogenase subunit 4L	No (S)	-13.3	5.20667	-18.5067
GlmaxMp51	245476	ccmFn	cytochrome c biogenesis FN	No (S)	-23.1067	-4.9	-18.2067
GlmaxMp51	245923	ccmFn	cytochrome c biogenesis FN	No (F)	15.5133	4.74	10.7733
GlmaxMp52	249476	rps4	ribosomal protein S4	S<->L	19.01	13.5233	5.48667
GlmaxMp52	249487	rps4	ribosomal protein S4	R<->W	16.7033	12.4133	4.29
GlmaxMp52	249571	rps4	ribosomal protein S4	P<->S	22.5567	13.8767	8.68
GlmaxMp52	249602	rps4	ribosomal protein S4	S<->L	21.15	8.87667	12.2733
GlmaxMp52	249622	rps4	ribosomal protein S4	P<->S	27.0567	13.1833	13.8733
GlmaxMp52	249631	rps4	ribosomal protein S4	H<->Y	17.7433	9.68333	8.06
GlmaxMp52	249704	rps4	ribosomal protein S4	P<->L	17.2167	11.59	5.62667
GlmaxMp52	249716	rps4	ribosomal protein S4	S<->L	20.9767	11.2067	9.77
GlmaxMp52	249728	rps4	ribosomal protein S4	P<->L	17.7367	11.2967	6.44
GlmaxMp52	249745	rps4	ribosomal protein S4	R<->C	25.8567	21.7167	4.14
GlmaxMp52	249902	rps4	ribosomal protein S4	S<->F	16.7767	13.55	3.22667
GlmaxMp52	250355	rps4	ribosomal protein S4	S<->L	6.64333	16.65	-10.0067
GlmaxMp52	250441	rps4	ribosomal protein S4	P<->S	13.0867	15.6633	-2.57667
GlmaxMp53	251428	rps1	ribosomal protein S1	S<->F	19.8667	11.3233	8.54333
GlmaxMp05-1	254609	nad5	NADH dehydrogenase subunit 5	intronic	19.48	12.42	7.06
GlmaxMp05-1	255398	nad5	NADH dehydrogenase subunit 5	intronic	15.43	12.3867	3.04333
GlmaxMp05-1	256221	nad5	NADH dehydrogenase subunit 5	intronic	-11.7867	9.41333	-21.2
GlmaxMp55	256776	atp1-2	ATPase subunit 1	No (T)	-21.4067	-3.66333	-17.7433
GlmaxMp55	257559	atp1-2	ATPase subunit 1	No (T)	-25.4733	2.26	-27.7333
GlmaxMp05-1	258873	nad5	NADH dehydrogenase subunit 5	intronic	7.77333	15.18	-7.40667
GlmaxMp31-2	320553	nad2	NADH dehydrogenase subunit 2	intronic	-16.1933	-4.2	-11.9933
GlmaxMp31-2	321092	nad2	NADH dehydrogenase subunit 2	intronic	2.46	15.4833	-13.0233
GlmaxMp31-2	323172	nad2	NADH dehydrogenase subunit 2	No (T)	11.9167	32.2667	-20.35
GlmaxMp20-3	337318	nad1	NADH dehydrogenase subunit 1	R<->C	-22.3767	-2.72333	-19.6533
GlmaxMp20-3	338025	nad1	NADH dehydrogenase subunit 1	intronic	-24.22	1.98333	-26.2033
GlmaxMp73	338284	matR	maturase	H<->Y	5.21	15.0633	-9.85333
GlmaxMp73	338320	matR	maturase	R<->C	10.9633	25.3233	-14.36
GlmaxMp73	338340	matR	maturase	P<->L	6.65667	22.8467	-16.19
GlmaxMp73	338495	matR	maturase	No (P)	22.0767	20.19	1.88667
GlmaxMp73	338976	matR	maturase	P<->L	15.4533	29.9833	-14.53
GlmaxMp73	339633	matR	maturase	S<->L	20.4967	35.4867	-14.99
GlmaxMp73	339801	matR	maturase	S<->F	23.9633	11.86	12.1033
GlmaxMp73	340005	matR	maturase	S<->F	20.8367	15.8933	4.94333
GlmaxMp20-3	340080	nad1	NADH dehydrogenase subunit 1	intronic	18.88	15.3267	3.55333
GlmaxMp78	355497	atp1-3	ATPase subunit 1	No (T)	-20.9533	-3.86667	-17.0867
GlmaxMp78	356280	atp1-3	ATPase subunit 1	No (T)	-25.1333	3.03333	-28.1667
GlmaxMp82	375512	atp8	ATPase subunit 8	No (Y)	-18.8433	-19.05	0.206667
GlmaxMp88	401084	mttB	transport membrane protein	P<->L	-20.6933	-3.63333	-17.06
GlmaxMp88	401319	mttB	transport membrane protein	R<->W	-10.7	7.64667	-18.3467
GlmaxMp88	401381	mttB	transport membrane protein	No (L)	-17.7767	-3.85333	-13.9233
Editing degrees that are differed by more than 15% are highlighed in yellow (+) and green (-), respectively.

## Sheet: Table S4
Table S4. Expression of nuclear intron maturases in the three tissues.
Gene id	Homologous genes in Arabidopsis	Chr	Start	End	Strand	mRNA Length	Protein Length	SR/UR	p-value	N/UR	p-value	N/SR	p-value	Root-control-1	Root-control-2	Root-control-3	UR-average FPKM	Stripped-root-1	Stripped-root-2	Stripped-root-3	SR-average FPKM	Nodule-1	Nodule-2	Nodule-3	N-average FPKM
Glyma.15G094350	nMat1	Chr16	26240309	26243618	+	3309	686	2.15613	0.0138384	1.19346	0.444738	0.55352	0.0138844	0.429947	0.635052	0.861953	0.642317	1.40033	1.59513	1.1593	1.38492	0.920423	0.677954	0.701366	0.766581
Glyma.09G023300	nMat2	Chr09	1879980	1884416	+	2949	707	1.37653	0.0782584	0.935519	0.665077	0.67962	0.0205672	5.14794	3.64088	3.59255	4.12713	6.5022	5.41463	5.12653	5.68112	3.99968	4.2152	3.36813	3.861
Glyma.15G129400	nMat2	Chr15	10357118	10361811	+	2968	711	1.53746	0.0204678	1.08987	0.554272	0.708881	0.0176038	1.53931	1.08527	1.12318	1.24925	1.90277	2.11404	1.7452	1.92067	1.5478	1.30743	1.22935	1.36153
Glyma.16G116350	nMat3	Chr16	26240309	26243618	+	2254	751	0.713525	0.699583	0.922703	0.906622	1.29316	0.754785	0.163575	0.373482	0.980616	0.505891	0.144862	0.0802	0.857836	0.360966	0.089328	0.739931	0.571102	0.466787
Glyma.16G222000	nMat3	Chr16	37850959	37855559	+	2688	896	2.66555	0.0148317	1.29509	0.474875	0.485861	0.0037701	0.267361	0.0548364	0.241	0.187732	0.462082	0.465616	0.573535	0.500411	0.27478	0.201544	0.253067	0.24313
Glyma.17G135400	nMat4	Chr17	10890751	10895120	-	4078	798	2.04503	0.0312844	2.16173	0.0220368	1.05707	0.632642	0.456771	0.181859	0.546585	0.395072	0.929354	0.781167	0.713276	0.807932	0.813142	0.772374	0.976604	0.85404
Ratios that are significantly increased or decreased (fold change > 1.5 or <0.067, p-value <0.05) are highlighed in yellow and green, respectively.

## Sheet: Table S5
Table S4. Primers used in this study.
Primer name	Forward primer	Genome position	Reverse primer	Genome position
rps3	agccaaaggttagtctcgca	310042-310061	ccgatttcggtaagactcga	311543-311562
rps3 intron1 exon2	agccaaaggttagtctcgca	310042-310061	cccacggcggagtcaccat	310140-310158
cox2	tgtgggattaattgattgaa	352413-352432	tgatgctgtacctggtcgtt	352567-352586
cox2 intron1 exon2	tgtgggattaattgattgaa	352413-352432	ggttgtacgacccaaaactc	352657-352676
ccmFc	gtgggtccatgtaaatgatcg	62325-62345	cacattttggagtgtgcatc	58095-58114
ccmFc intron1 exon1	cccggatcgagtcagagtt	58205-58223	cacattttggagtgtgcatc	58095-58114
nad1 exon1-2	gaccaatagagacttcataagagacca	53749-53775	ttgccatatcttcgttaggtg	163188-163208
nad1 intron1 exon2	gaccaatagagacttcataagagacca	53749-53775	cgtgctcgtacggttcaaag	53637-53656
nad1 exon2-3	attcagcttccgcttctgg	55376-55394	tctgcagctcaaatggtctc	53736-53755
nad1 intron2 exon2	ggttgggttaggggaacatc	53831-53850	tctgcagctcaaatggtctc	53736-53755
nad1 exon3-4	aaaagagcagaccccattga	340723-340742	tccgtttgatctcccagaag	55363-55382
nad1 intron3 exon4	aaaagagcagaccccattga	340723-340742	gggagctgtatgaacggtaa	340810-340829
nad1 exon4-5	agcccgggatcctcttga	337461-337478	tcttcaatggggtctgctc	340727-340745
nad1 intron4 exon5	agcccgggatcctcttga	337461-337478	acggagctgcatccctact	337542-337560
nad2 exon1-2	gcgagcagaagcaaggttat	133549-133568	ggatcctcccacatgttc	134964-134981
nad2 intron1 exon2	gcgagcagaagcaaggttat	133549-133568	cccattcctaaccagtttcg	133713-133732
nad2 exon2-3	aaaggaactgcagtgatcttga	323077-323098	aatatttgatcttaggtgcattttc	133201-133225
nad2 intron2 exon2	cccgatccgatagtttacga	133090-133109	aatatttgatcttaggtgcattttc	133201-133225
nad2 exon3-4	gcgcaatagaaaggaatgct	320439-320458	ctatgggtctactggagctaccc	323201-323223
nad2 intron3 exon4	gcgcaatagaaaggaatgct	320439-320458	ggcgaattcaaaactttttt	320582-320601
nad2 exon4-5	aacaggagaggggtgaagctt	341344-341364	tatttgttcttcgccgcttt	319991-320010
nad2 intron4 exon4	cttattcgtggcaaccttcc	319904-319923	tatttgttcttcgccgcttt	319991-320010
nad4 exon1-2	attctatgttcttcccgaaagc	102350-102371	gaaaaactgatatgctgccttg	100864-100885
nad4 intron1 exon2	ccgtatgatgcggaagtctc	101018-101037	gaaaaactgatatgctgccttg	100864-100885
nad4 exon2-3	aatacccatgtttcccgaag	100563-100582	tgctacctccaattccctgt	97093-97112
nad4 intron2 exon3	gcggaacgaccagaaaaaaa	97219-97238	tgctacctccaattccctgt	97093-97112
nad4 exon3-4	ttcctccataaattctccgatc	96742-96763	ttaaatttcccatgttgcac	94043-97112
nad4 intron3 exon4	tctagcttggttcggagagc	94195-94214	ttaaatttcccatgttgcac	94043-97112
nad5 exon1-2	tggaccaagctacttatggatg	253162-253183	ccatggatctcatcggaaat	252221-252240
nad5 intron1 exon2	tggaccaagctacttatggatg	253162-253183	ttcgcaaattggtccgact	253083-253101
nad5 exon2-4	aactcggattcggcaagaa	267639-267657	ctggctctcgggagtctctt	254301-254320
nad5 intron2 exon2	gtacgatcgtgtcgggtga	253489-254407	ctggctctcgggagtctctt	254301-254320
nad5 intron3 exon4	aactcggattcggcaagaa	267639-267657	gccgtgtaataggcgacca	267512-267530
nad5 exon4-5	aacattgcaaaggcataatga	268911-268931	gttcctgcgtttcggatatg	267853-267872
nad5 intron4 exon5	aacattgcaaaggcataatga	268911-268931	cctgtaaacccccatgatgt	268779-268798
nad7 exon1-2	acctcaacatcctgctgctc	170054-170073	aaggtaaagcttgaagataagttttgt	171076-171102
nad7 intron1 exon2	acggtttttagggggatctg	171001-171020	aaggtaaagcttgaagataagttttgt	171076-171102
nad7 exon2-3	gagggactgagaaattaatagagtaca	171052-171078	tggtacctcgcaattcaaaa	172503-172522
nad7 intron2 exon3	agtgggagagccgtgttatg	172323-172342	tggtacctcgcaattcaaaa	172503-172522
nad7 exon3-4	actgtcactgcacagcaagc	172859-172878	cattgcaaaattatccgcag	174106-174125
nad7 intron3 exon4	gaaagtgaagtggtgggcct	173940-173959	cattgcaaaattatccgcag	174106-174125
nad7 exon4-5	gatcaaagccgatgatcgtaa	174150-174170	aggtgcttcaacagcggtat	176308-176327
nad7 intron4 exon5	cggcaaaatgactacaggat	176213-176232	aggtgcttcaacagcggtat	176308-176327
MatR_soybean(32,404)_F	atgaaagaggcgatcagaat
MatR_soybean(32,404)_R	ccacgacgaaacaaggga
MatR_soybean(1061)_F	tgggaatcgtgggtgccgtag
MatR_soybean(1061)_R	tggatggcggagcgtaggtg
MatR_soybean(1697,1717)_F	tcgaggtatcattagccg
MatR_soybean(1697,1717)_R	gggtcttaccaccttcttg
α-tubulin_F(Glyma20g27280)	gaaggcctaccatgaacagc
α-tubulin_R(Glyma20g27280)	gtgacgaggatcacacttgg
